# Supplementary material for: Examining the prevalence, correlates and inequalities of undiagnosed hypertension in Nepal: a population-based cross-sectional study
Source: PubMed Central journal article supplement — BMJ Open. 2020 Oct 1;10(10):e037592. doi: 10.1136/bmjopen-2020-037592 (PMC7534699; doi:10.1136/bmjopen-2020-037592), 2020-10-01
Supplement: bmjopen-2020-037592.draft_revisions.pdf [file bmjopen-2020-037592.draft_revisions.pdf]

# BMJ Open

BMJ Open is committed to open peer review. As part of this commitment we make the peer review history of every article we publish publicly available.

When an article is published we post the peer reviewers' comments and the authors' responses online. We also post the versions of the paper that were used during peer review. These are the versions that the peer review comments apply to.

The versions of the paper that follow are the versions that were submitted during the peer review process. They are not the versions of record or the final published versions. They should not be cited or distributed as the published version of this manuscript.

BMJ Open is an open access journal and the full, final, typeset and author-corrected version of record of the manuscript is available on our site with no access controls, subscription charges or pay-per-view fees (<http://bmjopen.bmj.com>).

If you have any questions on BMJ Open's open peer review process please email [info.bmjopen@bmj.com](mailto:info.bmjopen@bmj.com)

# BMJ Open

## Examining the prevalence, correlates and inequalities of undiagnosed hypertension in Nepal: a population-based study

|                               |                                                                                                                                                                                                                                                                                                                                                                                                                                                                                                                                                                                                                                                                                                                                                                        |
|-------------------------------|------------------------------------------------------------------------------------------------------------------------------------------------------------------------------------------------------------------------------------------------------------------------------------------------------------------------------------------------------------------------------------------------------------------------------------------------------------------------------------------------------------------------------------------------------------------------------------------------------------------------------------------------------------------------------------------------------------------------------------------------------------------------|
| Journal:                      | <i>BMJ Open</i>                                                                                                                                                                                                                                                                                                                                                                                                                                                                                                                                                                                                                                                                                                                                                        |
| Manuscript ID                 | bmjopen-2020-037592                                                                                                                                                                                                                                                                                                                                                                                                                                                                                                                                                                                                                                                                                                                                                    |
| Article Type:                 | Original research                                                                                                                                                                                                                                                                                                                                                                                                                                                                                                                                                                                                                                                                                                                                                      |
| Date Submitted by the Author: | 09-Feb-2020                                                                                                                                                                                                                                                                                                                                                                                                                                                                                                                                                                                                                                                                                                                                                            |
| Complete List of Authors:     | Hasan, Md. Mehedi ; The University of Queensland Institute for Social Science Research,<br>Tasnim, Fariha; International Centre for Diarrhoeal Disease Research Bangladesh, Maternal and Child Health Division<br>Tariqujjaman, Md.; International Centre for Diarrhoeal Disease Research Bangladesh, Nutrition and Clinical Services Division<br>Ahmed, Sayem; Liverpool School of Tropical Medicine, Department of Tropical Biology; International Centre for Diarrhoeal Disease Research Bangladesh, Health Systems and Population Studies Division<br>Mamun, Abdullah; University of Queensland, Institute for Social Science Research; University of Queensland, ARC Centre of Excellence for Children and Families over the Life Course (The Life Course Centre) |
| Keywords:                     | Hypertension < CARDIOLOGY, Public health < INFECTIOUS DISEASES, EPIDEMIOLOGY                                                                                                                                                                                                                                                                                                                                                                                                                                                                                                                                                                                                                                                                                           |
|                               |                                                                                                                                                                                                                                                                                                                                                                                                                                                                                                                                                                                                                                                                                                                                                                        |

SCHOLARONE™  
Manuscripts

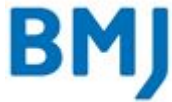

I, the Submitting Author has the right to grant and does grant on behalf of all authors of the Work (as defined in the below author licence), an exclusive licence and/or a non-exclusive licence for contributions from authors who are: i) UK Crown employees; ii) where BMJ has agreed a CC-BY licence shall apply, and/or iii) in accordance with the terms applicable for US Federal Government officers or employees acting as part of their official duties; on a worldwide, perpetual, irrevocable, royalty-free basis to BMJ Publishing Group Ltd ("BMJ") its licensees and where the relevant Journal is co-owned by BMJ to the co-owners of the Journal, to publish the Work in this journal and any other BMJ products and to exploit all rights, as set out in our [licence](#).

The Submitting Author accepts and understands that any supply made under these terms is made by BMJ to the Submitting Author unless you are acting as an employee on behalf of your employer or a postgraduate student of an affiliated institution which is paying any applicable article publishing charge ("APC") for Open Access articles. Where the Submitting Author wishes to make the Work available on an Open Access basis (and intends to pay the relevant APC), the terms of reuse of such Open Access shall be governed by a Creative Commons licence – details of these licences and which [Creative Commons](#) licence will apply to this Work are set out in our licence referred to above.

Other than as permitted in any relevant BMJ Author's Self Archiving Policies, I confirm this Work has not been accepted for publication elsewhere, is not being considered for publication elsewhere and does not duplicate material already published. I confirm all authors consent to publication of this Work and authorise the granting of this licence.

**Title:** Examining the prevalence, correlates and inequalities of undiagnosed hypertension in Nepal: a population-based study

**Authors:** Md. Mehedi Hasan<sup>1,2\*</sup>, Fariha Tasnim<sup>3</sup>, Md. Tariqujjaman<sup>4</sup>, Sayem Ahmed<sup>5-7</sup> and Abdullah A Mamun<sup>1,2</sup>

### Author affiliations

<sup>1</sup> Institute for Social Science Research, The University of Queensland, Indooroopilly, Queensland 4068, Australia

<sup>2</sup> ARC Centre of Excellence for Children and Families over the Life Course (The Life Course Centre), The University of Queensland, Indooroopilly, Queensland 4068, Australia

<sup>3</sup> Maternal and Child Health Division, International Centre for Diarrhoeal Disease Research, Bangladesh (icddr,b), Dhaka, Bangladesh

<sup>4</sup> Nutrition and Clinical Services Division, International Centre for Diarrhoeal Disease Research, Bangladesh (icddr,b), Dhaka, Bangladesh

<sup>5</sup> Department of Tropical Biology, Liverpool School of Tropical Medicine, Liverpool, United Kingdom

<sup>6</sup> Health Systems and Population Studies Division, International Centre for Diarrhoeal Disease Research, Bangladesh (icddr,b), Dhaka, Bangladesh

<sup>7</sup> Health Economics and Policy Research Group, Department of Learning, Informatics, Management and Ethics, Karolinska Institutet, Stockholm, Sweden

\* Correspondence:

Md. Mehedi Hasan

Institute for Social Science Research

ARC Centre of Excellence for Children and Families over the Life Course

The University of Queensland

80 Meiers Road, Long Pocket Precinct, Indooroopilly, Queensland 4068, Australia

Phone: +61 470 237 155

Fax: + 61 7 334 67646

E-mail: [m.m.hasan@uqconnect.edu.au](mailto:m.m.hasan@uqconnect.edu.au)

## ABSTRACT

**Objective:** To examine the prevalence, correlates and socio-demographic inequalities of undiagnosed hypertension in Nepal.

**Design:** This study used cross-sectional 2016 Nepal Demographic and Health Survey (NDHS) data. We defined a hypertensive patient to remain undiagnosed if the patient had systolic blood pressure  $\geq 140$  mmHg or diastolic blood pressure  $\geq 90$  mmHg and not once took any prescribed medicine to lower/control blood pressure or told by health professionals to have hypertension. Multiple binary logistic regression analysis was performed and Concentration Index was measured.

**Setting:** Nepal

**Participants:** Adult patients with hypertension

**Results:** Among 3334 hypertensive patients, 50.4% remained undiagnosed during the survey in Nepal. Adjusted model reveals that patients who were male, belonged to households other than richest quintile, and lived in Province 4 and Province 5 were at higher risk and patients who were 65+ years of age and were overweight/obese were at lower risk of remaining undiagnosed for hypertension. The poor-rich gap was 24.6 percentage points (Q1= 64.1% vs Q5= 39.6%) and poor:rich ratio was 1.6 (Q1/Q5= 1.6) in the prevalence of undiagnosed hypertension. Undiagnosed hypertension was disproportionately distributed among socioeconomically worse-off Nepalese patients (Concentration Index, C= -0.18). Inequalities in the prevalence of undiagnosed hypertension further varied across other geographic locations including place of residence, ecological zones and administrative provinces.

1  
2  
3 **Conclusions:** Among Nepalese hypertensive patients, undiagnosed hypertension was highly  
4 prevalent with substantial inequalities that warrants efforts including increasing awareness and  
5 enactment of social insurance policy for prevention and control of this burden.  
6  
7  
8  
9

10 **Keywords:** Undiagnosed hypertension, Inequality, Demographic and Health Survey, Nepal  
11  
12  
13

### 14 **Strengths and limitations of this study**

15

- 16 • This study determined the prevalence of undiagnosed hypertension in Nepal using the  
17 most updated population-based nationally representative data
  - 18 • This study explored the factors that potentially drive the prevalence of hypertensive  
19 patients remained undiagnosed
  - 20 • This study measured both absolute and relative inequalities in the prevalence of  
21 undiagnosed hypertension at national level as well as across place of residence,  
22 ecological zones and administrative provinces
  - 23 • The cross-sectional nature of the data limits us to measure causal association between  
24 undiagnosed hypertension and the explanatory variables studied
  - 25 • The association of some potential behavioral or lifestyle factors and family history with  
26 undiagnosed hypertension remain unmeasured due to lack of information
- 27  
28  
29  
30  
31  
32  
33  
34  
35  
36  
37  
38  
39  
40  
41  
42  
43  
44  
45  
46  
47  
48  
49  
50  
51  
52  
53  
54  
55  
56  
57  
58  
59  
60

## INTRODUCTION

Globally, hypertension -or raised blood pressure is a directing factor for cardiovascular diseases (CVDs), specially heart diseases, myocardial infarctions, kidney failure, strokes, disability and premature deaths [1–3]. Hypertension affects one billion people and kills nine million people every year worldwide [1]. In South-East Asian countries including Nepal, hypertension affects one out of three adults, which accounts for nearly 1.5 million adult deaths annually; and 9.4% of the total deaths [4]. Studies identified, more than 50% people having hypertension remained undiagnosed in South-East Asian region [5]. Among South Asian countries, Nepal has one of the highest prevalence of hypertension [6].

Currently, Nepal is facing an epidemiological transitions with increasing prevalence of hypertension [7]. Several studies have been driven so far to understand the actual prevalence of hypertension in Nepal. A study based on the Nepal Demographic and Health Survey 2016 showed, about 20% Nepalese adults (aged  $\geq 18$  years) had hypertension [8]. Studies also found, the prevalence of hypertension ranges from 23% to 34% in Nepal [7,9–12]. Furthermore, national NCD risk factor survey in 2013 showed about 25.7% adults aging 15-69 years had hypertension in Nepal [13]. This survey also found that a large number of (42.7%) adults had never measured their blood pressure. For prevention, control and proper treatment of hypertension, it is prior need to correctly diagnose this disease. In addition, failure to early diagnosis and treatment of hypertension may lead to serious health hazards, disability in the later life, or eventually deaths. Number of government, non-government and private health facilities are providing health services including diagnosis, medication and treatment for hypertension. However, the existing health systems of Nepal is not ready for diagnosis, treatment and control of hypertension especially for the mass people at the community level indicating the challenges to tackle this burden [14].

1  
2  
3 To prevent hypertension, the disease needs to be diagnosed first before any related complications  
4 arise. However there is lack of evidence about the prevalence of undiagnosed hypertension in  
5 Nepal at national and subnational levels. The estimates of undiagnosed hypertension, and its socio-  
6 demographic inequalities at national and subnational level may help the policy makers for  
7 formulating effective strategies for screening, treatment and control as well as prevention of such  
8 burden by identifying the most vulnerable groups. Therefore, given the importance of this burden,  
9 we aimed to examine the prevalence, correlates and socio-demographic inequalities of  
10 undiagnosed hypertension in Nepal.  
11  
12  
13  
14  
15  
16  
17  
18  
19  
20  
21  
22  
23  
24

## 25 **METHODS**

### 26 **Data source**

27  
28  
29  
30  
31 We used the most updated nationally representative cross-sectional data from Nepal Demographic  
32 and Health Survey (NDHS). Though the data of Demographic and Health Surveys is managed by  
33 Measure Evaluation, the NDHS was conducted from June 2016 to January 2017 by a private  
34 research organization named “NEW ERA” under the monitoring and supervision of the Ministry  
35 of Health, Nepal. Designed specially to estimate the prevalence of hypertension nationally in  
36 Nepal, the NDHS 2016 obtained informed consent from the household head on behalf of all  
37 household members of each surveyed households [15]. For academic and scientific purposes, this  
38 anonymous dataset without any identifiers was made available by the ICF International, Maryland,  
39 United States [15]. We obtained approval with access to use the data to conduct this study.  
40  
41  
42  
43  
44  
45  
46  
47  
48  
49  
50  
51  
52  
53  
54  
55  
56  
57  
58  
59  
60



## Survey procedure

In 2015, Nepal declared some new places to fall under municipalities and some municipalities have been reformed [8]. After these changes, Nepal has been divided into seven administrative provinces comprising several districts under each province and urban-rural areas. These urban and rural areas were divided into small administrative units as wards. Because of having comparatively greater number of households in urban areas, the urban area was further divided into enumeration area (EA). The primary sampling unit (PSU) were wards for both urban and rural areas [15]. Because of some changes in administrative areas, Nepal revised the sampling frame of National Population and Housing Census (NPHC). The 2016 NDHS used this revised sampling frame and applied a multistage survey that respectively conducted in two and three stages in rural and urban areas. NDHS selected the PSUs proportionately to the size in the first stage and then the random selection of EAs from the systematic selection of households from each PSU in second stage. In third stage, the selection of households were by using stratified cluster sampling technique in urban setting. A detailed description about the methodology is available elsewhere [15]. A total of 11490 households were selected from 383 wards, of which 5520 households from 184 wards were from urban settings and 5970 households from 199 wards were from rural settings. From these households, all the residents whose age 15 years or above were eligible for the measurement of blood pressure. With an overall 95% response rate, a total of 14823 individuals participated in the survey.

## Outcome variable

To measure hypertension, the 2016 NDHS used the UA-767F/FAC (A&D Medical) automated device to record the blood pressure of the participants. With 5 minutes intervals between each

1  
2  
3 measurement, the 2016 NDHS recorded the measurements of blood pressure for three times in a  
4 sitting position. NDHS considered the last two measures of blood pressure levels and used their  
5 mean to detect hypertension. The survey used the World Health Organization (WHO) guidelines  
6 to report a participant as hypertensive [15]. This guideline has integrated the 2017 guidelines of  
7 the American College of Cardiology/ American Society of Hypertension [16,17]. According to the  
8 guideline, a participant with systolic blood pressure (SBP)  $\geq 140$  mmHg or diastolic blood pressure  
9 (DBP)  $\geq 90$  mmHg is diagnosed as a hypertension case. We also considered participants as patients  
10 of hypertension if s/he was previously told by health professional to have hypertension or taking  
11 medication to control hypertension. Our outcome variable is undiagnosed hypertension. We  
12 considered a patient to remain undiagnosed if the patient had SBP  $\geq 140$  mmHg or DBP  $\geq 90$  mmHg  
13 during blood pressure measurement of biomarker test of the survey and not once took any  
14 prescribed medicine to lower/control blood pressure or being told by health professionals to have  
15 hypertension prior survey [18,19].  
16  
17  
18  
19  
20  
21  
22  
23  
24  
25  
26  
27  
28  
29  
30  
31  
32  
33  
34  
35  
36

### 37 **Explanatory variables**

38  
39 This study considered a set of socio-demographic and behavioral characteristics as independent  
40 variables. Age (in years), sex, Body Mass Index (BMI) measured through dividing the weight by  
41 squared height ( $\text{kg}/\text{m}^2$ ), education level, household wealth status place of residence, ecological  
42 zone, and provinces were considered as socio-demographic characteristics of the patients. Age was  
43 categorized as 15-24, 25-34, 35-44, 45-54, 55-64 and  $\geq 65$  years. Sex had two categories, male and  
44 female. The BMI was categorized as thin/underweight ( $\text{BMI} < 18.5 \text{ kg}/\text{m}^2$ ), normal ( $18.5 \text{ kg}/\text{m}^2$   
45  $\leq \text{BMI} < 25 \text{ kg}/\text{m}^2$ ) and overweight/obese ( $\text{BMI} \geq 25.0 \text{ kg}/\text{m}^2$ ). Based on the highest class completed  
46 by the respondents, level of education was classified as no education, primary, secondary and  
47  
48  
49  
50  
51  
52  
53  
54  
55  
56  
57

1  
2  
3 higher. NDHS used principal component analysis [15] to construct the wealth index to desegregate  
4 the households into five socioeconomic quintiles (poorest, poorer, middle, richer and richest). The  
5 place of residence was stratified as urban and rural across all geographic location. Nepal was  
6 ecologically divided in Mountain, Hill and Terai. Using 2015 reformation, 7 administrative  
7 provinces were considered as Province 1, Province 2, Province 3, Province 4, Province 5, Province  
8 6 and Province 7. Three behavioral characteristics of respondents, caffeine, tobacco and alcohol  
9 consumption were considered as independent variables each of which contained dichotomous  
10 response on whether respondent consume caffeine, tobacco or alcohol.  
11  
12  
13  
14  
15  
16  
17  
18  
19  
20  
21  
22  
23  
24

### 25 **Statistical analyses**

26  
27  
28 We described the prevalence of undiagnosed hypertension and background characteristics of the  
29 study patients by using univariate analysis technique. The estimates of each of the categorical  
30 variables included in this study were reported with numbers, weighted percentages and 95%  
31 confidence intervals (CI) of estimates. The weighted prevalence of undiagnosed hypertension was  
32 determined across the background characteristics of the study patients from bivariate analysis.  
33 Statistical significance was detected by applying Chi-square test. Then, we conducted simple and  
34 multiple binary logistic regression analyses to examine the correlates of undiagnosed hypertension.  
35 The results of the regression analysis were presented in terms of odds ratio with respective 95%  
36 CI. Variables that were statistically significant in simple logistic regression analysis were entered  
37 in the multiple regression model to estimate the adjusted odds ratio (AOR). Notably, the statistical  
38 significance was defined at 5% level ( $p\text{-value} < 0.05$ ). Variance inflation factors to detect  
39 multicollinearity among the independent variables were assessed before incorporating them into  
40 the multiple regression model. Due to hierarchical structure of NDHS data, we considered the  
41  
42  
43  
44  
45  
46  
47  
48  
49  
50  
51  
52  
53  
54  
55  
56  
57  
58  
59  
60

1  
2  
3 cluster sampling design of the 2016 NDHS to estimate the prevalence and determinants in this  
4 study [15]. We excluded cases with missing values for blood pressure measurements.  
5  
6  
7

8 Proposed by Wagstaff [20] to measure the inequality, we estimated the concentration index (C),  
9  
10 to show the degree and direction of wealth-based inequality in undiagnosed hypertension  
11 prevalence. For the purpose of calculating C, the households were ranked from the poorest to the  
12 richest according to their socioeconomic characteristics. We plotted a concentration curve to  
13 portray the distribution of undiagnosed hypertension. The Y-axis of the concentration curve  
14 representing the cumulative proportion of undiagnosed hypertension and the X-axis represents the  
15 cumulative proportions of the population across wealth quintiles. When the concentration curve  
16 coincide with the diagonal, the prevalence of undiagnosed hypertension is treated as equally  
17 distributed across socioeconomic groups. In contrast, the concentration curve typically deviate  
18 from the diagonal if there exist inequalities in the prevalence of undiagnosed hypertension. The C  
19 is defined as twice the area between the concentration curve and the diagonal [21–23]. The index  
20 value can range between  $-1$  and  $+1$ , a positive value implies prevalence of undiagnosed  
21 hypertension is more concentrated among the better-off socioeconomic group and a negative value  
22 implies prevalence is more concentrated among less affluent group [22,24]. We repeat the  
23 estimation of C across other geographical locations such as place of residence, ecological zones  
24 and provinces to detect the group of patients with highest severity of socioeconomic inequalities  
25 in the prevalence of undiagnosed hypertension. STATA (version 13) was used to perform all the  
26 analyses [25].  
27  
28  
29  
30  
31  
32  
33  
34  
35  
36  
37  
38  
39  
40  
41  
42  
43  
44  
45  
46  
47  
48

### 49 **Patient and public involvement**

50  
51  
52  
53 Patients and publics were not involved in developing the research questions, measuring outcome  
54 and designing the study. Information of the participants were anonymous.  
55  
56  
57

## RESULTS

### General Characteristics of the Study Participants

**Table 1** shows the general characteristics of the study participants. Among the patients studied, the average age of patients was 49.8 years (95% CI 49.1, 50.5) with the lowest percentage of patients belonged to 15-24 years age group (6.6%) and highest percentage of patients belonged to 45-54 years age group (20.9%). Numbers of males (49.5%) and females (50.5%) in the sample were almost equal. Nearly half of the patients were normal in terms of their BMI while more than one third of the patients were overweight/obese. Though two-third of the patients resided in urban area (64.9%), the educational status of the patients were poor. Nearly half of the patients had no education while 24.1% and 11.5% had secondary and higher education respectively. The highest number of patients belonged to richest wealth quintile (28.3%) and the lowest number of patients belonged to the poorest wealth quintile (15.5%). Also, the highest number of patients were from province 3 (26.0%) followed by province 5 (17.8%) and province 1 (17.0%). However, only 5.6% of the patients were from mountain ecological zone.

### Prevalence of Undiagnosed Hypertension among Hypertensive Patients

In our study, we found 3334 cases who had hypertension during the survey. More than half of them were detected as remaining undiagnosed (50.4%). The prevalence of undiagnosed hypertension among the patients varied across their age ( $p$ -value < 0.001), sex ( $p$ -value < 0.001), BMI ( $p$ -value < 0.001), wealth quintile ( $p$ -value < 0.001) and place of residence ( $p$ -value < 0.01). The prevalence of undiagnosed hypertension were higher among patients with 15-24 years age group and steadily decreasing with the increase of age. The prevalence of undiagnosed

1  
2  
3 hypertension was higher among male patients (54.2%) than female (46.7%). Compare to patients  
4  
5 with normal BMI, the prevalence of undiagnosed hypertension was higher among thin patients  
6  
7 (57.8%) and lower among overweight/obese patients (44.4%). Compare to patients of the richest  
8  
9 wealth quintile (39.6%), the prevalence of undiagnosed hypertension was higher among patients  
10  
11 of the poorest (64.1%) and poorer (55.8%) quintiles. The rate of undiagnosed hypertension was  
12  
13 higher among rural patients (55.2%) compare to urban (47.8%). No educational, ecological and  
14  
15 provincial variations in the prevalence of undiagnosed hypertension was observed (**Table 1**).  
16  
17  
18  
19  
20  
21  
22

### 23 **Determinants of Undiagnosed Hypertension among Hypertensive Patients**

24  
25 We found that patient's age, sex, BMI, wealth quintile, place of residence and province were  
26  
27 significantly associated with the prevalence of undiagnosed hypertension among hypertensive  
28  
29 patients in unadjusted logistic regression analysis (see **supplementary**).  
30  
31  
32

33 **Figure 1** represents the results of multiple logistic regression analysis. The multiple binary logistic  
34  
35 regression model showed that patient's age, sex, BMI, wealth quintile and province had significant  
36  
37 association with undiagnosed hypertension. Elderly patients  $\geq 65$  years of age had a lower  
38  
39 likelihood of being undiagnosed for hypertension than patients with age 15-24 years (Adjusted  
40  
41 Odds Ratio, AOR = 0.65; 95% CI 0.48, 0.91). Male patients were 1.29 times more likely than  
42  
43 female patients to remain undiagnosed for hypertension (AOR = 1.29, 95% CI 1.11, 1.51).  
44  
45 Compare to patients with normal BMI, overweight/obese patients (AOR = 0.80, 95% CI 0.69,  
46  
47 0.93) were less likely to have undiagnosed hypertension.  
48  
49  
50  
51

52 We found wealth quintiles as potential correlates of undiagnosed hypertension. The risk of  
53  
54 remaining undiagnosed for hypertension was increasing with the decrease of patient's  
55  
56  
57  
58  
59  
60

1  
2  
3 socioeconomic status. Patients with a poorer socioeconomic status had higher chance of having  
4  
5 undiagnosed hypertension compared to higher socioeconomic quintiles. Patients of poorest and  
6  
7 poorer wealth quintiles were 2.49 (AOR = 2.49; 95% CI 1.90, 3.30) and 1.67 (AOR = 1.67; 95%  
8  
9 CI 1.29, 2.16) times more likely to have an undiagnosed hypertension condition than patients of  
10  
11 richest wealth quintile.  
12  
13

14  
15 Moreover, significant provincial variation was evident in the prevalence of undiagnosed  
16  
17 hypertension among hypertensive patients. Patients of province 4 (AOR = 1.36, 95% CI 1.04, 1.79)  
18  
19 and province 5 (AOR = 1.43, 95% CI 1.05, 1.95) were more likely to had undiagnosed  
20  
21 hypertension than patients of province 1.  
22  
23  
24  
25  
26  
27

### 28 **Socioeconomic Inequalities in Undiagnosed Hypertension among Hypertensive Patients**

29  
30  
31 **Figure 2** depicts the inequalities in the prevalence of undiagnosed hypertension among  
32  
33 hypertensive patients. The absolute poor (Q1) - rich (Q5) difference in the distribution of  
34  
35 undiagnosed hypertension was 24.6% between poorest and richest, meaning that the prevalence of  
36  
37 undiagnosed hypertension was greater by 24.6 percentage points among the poorest. The relative  
38  
39 measure of inequality in terms of poor (Q1): rich (Q5) ratio was 1.6 for the prevalence of  
40  
41 undiagnosed hypertension among patients, depicting that the prevalence of undiagnosed  
42  
43 hypertension was higher by 1.6 times among the poorest than richest. We found negative value of  
44  
45 the Concentration Index ( $C = -0.18$ ) which represents that the prevalence of undiagnosed  
46  
47 hypertension among hypertensive patients was disproportionately distributed among worse-off  
48  
49 socioeconomic groups.  
50  
51  
52  
53  
54  
55  
56  
57  
58  
59  
60

1  
2  
3 In addition, patients living in mountain and in province 7 had large gaps in the prevalence of  
4 undiagnosed hypertension (**Figure 3**). The higher Q1:Q5 ratio were observed among those who  
5 had large Q1-Q5 gaps in the prevalence of undiagnosed hypertension across different geographic  
6 locations. We found large negative values of C among those who had higher Q1-Q5 gaps and  
7 Q1:Q5 ratio for the prevalence of undiagnosed hypertension. See **Figure 3** for details.  
8  
9  
10  
11  
12  
13  
14  
15  
16  
17

## 18 **DISCUSSION**

19  
20  
21 Undiagnosed hypertension may lead to adverse health consequences, including some organ  
22 damages [26]. Utilizing NDHS 2016 data, this study intended to estimate the prevalence of  
23 undiagnosed hypertension. In addition, the risk factors and inequalities associated with it among  
24 Nepalese hypertensive patients were identified. About half of the biomarker partekars were found  
25 hypertension positive who were not screened/ diagnosed before the survey. Patients unwillingness  
26 for regular check-up before any health complication arises due to lack of awareness as well as  
27 inaccessibility to screening services may direct this high prevalence [27]. Gap in knowledge,  
28 attitude and practice of healthy lifestyle as preventive measure to NCDs may also act as a driver  
29 of undiagnosed hypertension [27–29]. Community-based awareness on changing lifestyle to  
30 address the burden of NCD from the society as a whole might be effective in reducing this gap  
31 [30].  
32  
33  
34  
35  
36  
37  
38  
39  
40  
41  
42  
43  
44  
45

46  
47 Several studies reported higher risk of hypertension among people who were older in age, male,  
48 urban dwellers, had higher education level, regular consumer of tobacco and alcohol, and who are  
49 overweight [6,8,28,29]. In contrast, we found that patients aged 65+ years and who were  
50 overweight/obese were at lower risk of remaining undiagnosed from this disease. However, our  
51  
52  
53  
54  
55  
56  
57  
58  
59  
60



1  
2  
3 findings depicted greater proportion of undiagnosed patients among those who were young and  
4 physically thin. Young or underweight people are less conscious about their health status as they  
5 might have the misconception that they are less likely to suffer from non-communicable diseases  
6 [31]. None the less, richest are more aware than the poorest people about the health hazards,  
7 typically have greater access for screening diseases and can have the ability to afford treatment  
8 cost for the diseases in Nepal [28]. This could lead the poor than the rich to be more exposed to  
9 undiagnosed hypertension. On the other hand, similar to risk factors of hypertension, undiagnosed  
10 hypertension were also more prevalent among males and tobacco users [6,29]. Although difference  
11 in lifestyle practice between male and female in Nepal may not be the key factor behind such  
12 exposure, research need to be done to identify the actual risk factor [29].  
13  
14

15 Globally few studies have been conducted on undiagnosed hypertension to date. World Health  
16 Organization, mentioning hypertension as a silent killer, stated the prevalence of hypertension is  
17 higher in low- and middle-income countries than developed and high income countries [1]. Our  
18 results proves this claim and also aligns with findings from Bangladesh and Sub-Saharan Africa  
19 [19,32,33]. Although situated in closer geographic region, prevalence of undiagnosed hypertension  
20 from this study differs from that of India and China which are more developed and belongs to high  
21 income countries with up to date facility setup and health policies for their citizens [34,35].  
22 Similarly, findings from studies conducted in countries with more developed health facilities and  
23 advanced screening system such as Japan, Korea, England, Ireland, Egypt , Brazil and USA were  
24 also found to have lower level of undiagnosed hypertension than Nepal as found in this study [36–  
25 42].  
26  
27

28 In Nepal, despite the detection of risk factors [6,8,29] and inequalities [28], the prevalence of  
29 hypertension was well investigated nationally which lead policy makers to successfully steer away  
30  
31  
32  
33  
34  
35  
36  
37  
38  
39  
40  
41  
42  
43  
44  
45  
46  
47  
48  
49  
50  
51  
52

1  
2  
3 it's progression [43]. However, this effort will be meaningless unless all patients at risk of  
4 hypertension are accurately diagnosed and detected. On that account, it is necessary to identify  
5 whether unequal distribution of undiagnosed hypertension exists among patients with hypertension  
6 across different socioeconomic groups. It will aid in setting priorities and proper allocation of  
7 resources. Our study reveals existence of inequalities in the distribution of undiagnosed  
8 hypertension due to economic status, with poorest had higher prevalence of undiagnosed  
9 hypertension than richest and showed greater degree of wealth-based inequality concentrated  
10 among the poorest. These inequalities were more prevalent among patients living in different  
11 geographical locations including place of residence, ecological zones and administrative  
12 provinces. Such disparity may ascribed to greater awareness and more utilization of healthcare  
13 benefits by people who are rich [28]. Such inequality might increase the catastrophic health  
14 spending given the rise of catastrophic household expenditure due to non-communicable diseases  
15 in Nepal [14,44]. Public health strategies might reduce this gap by concentrating more on  
16 implementing social health insurance policies which has to be equitable for all [36,44]. In this  
17 aspect, policy makers could take into consideration the disparities in the distribution of  
18 undiagnosed hypertension found in this study.

19  
20  
21 Ignoring the population at risk of hypertention may become a major threat to health outcomes to  
22 any nation. This study bestows an immense opportunity to estimate the prevalence of undiagnosed  
23 hypertension which had not yet been studied nationally in Nepal. NDHS 2016 through  
24 incorporation of biomarker test bears evidence that a substantial proportion of individuals are  
25 suffering from blood pressure abnormalities. This in fact emphasise the need of conducting routine  
26 screening for hypertension widened with the greatest possible coverage in the population. A  
27 routine surveillance system with technology-based screening can aid in tracing disease incidence

1  
2  
3 as well as people at risk of being undiagnosed [45]. Our study findings will be helpful to initiate  
4 policies and programs in capturing the highest domain of underprivileged population and bring  
5 them under routine surveillance at community level with optimum cost.  
6  
7  
8  
9

### 10 **Strengths and limitations**

11  
12  
13 We used most updated nationally representative cross-sectional data to determine the prevalence,  
14 correlates and inequalities of undiagnosed hypertension in Nepal. We considered complex survey  
15 design to capture variations due to designing. However, there may have residuals and unmeasured  
16 potential behavioral or lifestyle factors of undiagnosed hypertension that may remain unmeasured  
17 due to lack of information. Since our data was corss-sectional, the relationship between  
18 undiagnosed hypertension and confounders were probabilistic rather than causal. However,  
19 identification of potential correlates through using odds ratio is widely acceptable. This study  
20 measured both absolute and relative inequalities in the prevalence of undiagnosed hypertension at  
21 national level as well as across place of residence, ecological zones and administrative provinces  
22 to further guide policy/decision makers for better allocation of resources to reduce the burden.  
23  
24  
25  
26  
27  
28  
29  
30  
31  
32  
33  
34  
35  
36  
37  
38  
39

### 40 **CONCLUSIONS**

41  
42  
43 This study manifests, in Nepal huge number of respondents with hypertension remained  
44 undiagnosed. Initiative for non-communicable disease diagnoses prioritizing those who are down  
45 and out requires to be implemented. Community-based awareness should be raised to improve  
46 knowledge, attitude and practice of the people particularly those who are young, slender, poor and  
47 male given their higher risk of being undiagnosed. Moreover, identification of inequalities among  
48 different risk groups will be beneficial in achieving universal health coverage of sustainable  
49  
50  
51  
52  
53  
54  
55  
56  
57  
58  
59  
60

1  
2  
3 development goal (Goal 3.8.1). Social insurance policies under integrated national NCD policy  
4 should be properly enacted to ensure socioeconomically disadvantaged populations covered under  
5 the scheme for prevention and control of hypertension from them.  
6  
7  
8  
9  
10

### 11 12 **Acknowledgments**

13  
14 We acknowledge the MEASURE DHS for providing access to NDHS 2016 datasets.  
15  
16

### 17 18 **Contributors**

19  
20 MMH and AAM conceptualized the study. MMH performed the data analysis and interpretation  
21 of the findings. MMH, FT, MT and SA contributed to writing. AAM and SA critically reviewed  
22 the analysis and final version of the manuscript. All authors made a through review of the final  
23 draft and approved it for submission.  
24  
25  
26  
27  
28  
29

### 30 31 32 **Funding**

33  
34 This research received no external funding.  
35  
36

### 37 38 **Competing interests**

39  
40 None declared.  
41  
42

### 43 44 **Ethical approval**

45  
46 The NDHS survey methodology and questionnaire was reviewed and approved by the ethical  
47 review board of Nepal Research Council and ICF Institutional. NDHS obtained informed consent  
48 from the respondents before conducting the survey. Therefore, separate ethical approval was not  
49 required for this study and we are using publicly available de-identified data.  
50  
51  
52  
53  
54  
55

## Data sharing statement

Data are available in a public, open access repository. All data related to study are included in the manuscript.

## REFEENCES

- 1 Day WH. World Health Organisation. A global brief on Hypertension. Published Online First: 2013. doi:10.1136/bmj.1.4815.882-a
- 2 Wojciechowski D P V.  $\beta$ -blockers in the management of hypertension: focus on nebivolol. *Expert Rev Cardiovasc Ther* 2014;**6**:471–9.
- 3 Chockalingam A, Facc MS, C NRCF, *et al.* Worldwide epidemic of hypertension. 2006;**22**:553–5.
- 4 Region SA. *Noncommunicable Diseases in the South-East Asia Region*. 2011.
- 5 Mohan V, Seedat YK, Pradeepa R. The Rising Burden of Diabetes and Hypertension in Southeast Asian and African Regions: Need for Effective Strategies for Prevention and Control in Primary Health Care Settings. *Int J Hypertens* 2013;**2013**:1–14. doi:10.1155/2013/409083
- 6 Agho KE, Osuagwu UL, Ezeh OK, *et al.* Gender differences in factors associated with prehypertension and hypertension in Nepal: A nationwide survey. *PLoS One* 2018;**13**:1–18. doi:10.1371/journal.pone.0203278
- 7 Vaidya A, Pathak RP, Pandey MR. Prevalence of hypertension in Nepalese community triples in 25 years: A repeat cross-sectional study in rural Kathmandu. *Indian Heart J* 2012;**64**:128–31. doi:10.1016/S0019-4832(12)60045-5
- 8 Hasan M, Sutradhar I, Akter T, *et al.* Prevalence and determinants of hypertension among adult population in Nepal: Data from Nepal demographic and health survey 2016. *PLoS One* 2018;**13**:1–14. doi:10.1371/journal.pone.0198028
- 9 Ghimire A, Shrestha NR, Thapa L, *et al.* Prevalence of Hypertension, Obesity, Diabetes, and Metabolic Syndrome in Nepal. *Int J Hypertens* 2011;**2011**:1–9. doi:10.4061/2011/821971
- 10 Shrestha UK, Singh DL, Bhattarai MD. The prevalence of hypertension and diabetes defined by fasting and 2-h plasma glucose criteria in urban Nepal. *Diabet Med* 2006;**23**:1130–5. doi:10.1111/j.1464-5491.2006.01953.x
- 11 Mehta KD, Karki P, Lamsal M, Paudel IS, Majhi S, Das BK, Sharma S, Jha N BN. Hyperglycemia, glucose intolerance, hypertension and socioeconomic position in eastern Nepal. *Southeast Asian J Trop Med Public Heal* 2011;**42**:197–207.
- 12 McLachlan CS, Sharma R, Khanal V, *et al.* Prevalence of Hypertension in Member

- 1  
2  
3 Countries of South Asian Association for Regional Cooperation (SAARC). *Medicine*  
4 (*Baltimore*) 2014;**93**:e74. doi:10.1097/md.0000000000000074  
5
- 6 13 Habits D. Non Communicable Diseases Risk Factors : STEPS Survey Nepal 2013. 2013.  
7
- 8 14 Dhital SM, Karki A. Dealing with the burden of hypertension in Nepal : current status ,  
9 challenges and health system issues. *Reg Heal Forum* 2013;**17**:44–52.  
10
- 11 15 MOHP New ERA and ICF DHS Program. Nepal Demographic and Health Survey 2016.  
12 2017;:636.  
13
- 14 16 Whelton PK, Carey RM, Aronow WS, *et al.* 2017  
15 *ACC/AHA/AAPA/ABC/ACPM/AGS/APhA/ASH/ ASPC/NMA/PCNA guideline for the*  
16 *prevention, detection, evaluation, and management of high blood pressure in adults:*  
17 *Executive summary: A report of the American college of cardiology/American Heart*  
18 *Association task .* 2018. doi:10.1161/HYP.0000000000000066  
19
- 20 17 Chalmers J. 1999 World Health Organization-International Society of Hypertension  
21 guidelines for the management of hypertension. *Clin Exp Hypertens* 1999;**21**:1009–60.  
22 doi:10.3109/10641969909061028  
23
- 24 18 Hou X. Urban – Rural Disparity of and Untreated Hypertension in China. *Asia Pac J*  
25 *Public Heal* 2008;**20**:159–69.  
26
- 27 19 Ahmed S, Tariqujjaman M, Rahman MA, *et al.* Inequalities in the prevalence of  
28 undiagnosed hypertension among Bangladeshi adults: Evidence from a nationwide survey.  
29 *Int J Equity Health* 2019;**18**:1–12. doi:10.1186/s12939-019-0930-5  
30
- 31 20 Wagstaff A. The bounds of the concentration index when the variable of interest is binary,  
32 with an application to immunization inequality. *Health Econ* 2005;**14**:429–32.  
33 doi:10.1002/hec.953  
34
- 35 21 Wagstaff A, Doorslaer E van, Paci P. On the measurement of horizontal inequity in the  
36 delivery of health care. *J Health Econ* 1991;**10**:169–205.  
37
- 38 22 Kakwani N, Wagstaff A, Doorslaer E van. Socioeconomic inequalities in health:  
39 measurement, computation and statistical inference. *J Econom* 1997;**77**:87–103.  
40
- 41 23 O’Donnell O, Doorslaer E Van. *Analyzing Health Equity Using Household Survey Data.*  
42 *Washington.* 2008. doi:10.2471/BLT.08.052357  
43
- 44 24 Koolman X, Doorslaer E van. On the interpretation of a concentration index of inequality.  
45 *Health Econ* 2004;**13**:649–56.  
46
- 47 25 StataCorp. Stata Statistical Software: Release 13. 2013.  
48
- 49 26 Schmieder RE. Hypertoniebedingte endorganschäden. *Dtsch Arztebl* 2010;**107**:866–73.  
50 doi:10.3238/arztebl.2010.0866  
51
- 52 27 Shrestha S, Shrestha A, Koju RP, *et al.* Barriers and facilitators to treatment among  
53 patients with newly diagnosed hypertension in Nepal. *Heart Asia* 2018;**10**:1–7.  
54 doi:10.1136/heartasia-2018-011047  
55  
56  
57  
58  
59  
60

- 1  
2  
3 28 Mishra SR, Ghimire S, Shrestha N, *et al.* Socio-economic inequalities in hypertension  
4 burden and cascade of services: nationwide cross-sectional study in Nepal. *J Hum*  
5 *Hypertens* 2019;**33**:613–25. doi:10.1038/s41371-019-0165-3  
6  
7 29 Chataut J, Adhikari R, Sinha N. The prevalence of and risk factors for hypertension in  
8 adults living in central development region of Nepal. *Kathmandu Univ Med J* 2011;**9**:13–  
9 8.  
10  
11 30 Kim Y, Kong KA. Do hypertensive individuals who are aware of their disease follow  
12 Lifestyle recommendations better than those who are not aware? *PLoS One* 2015;**10**:1–13.  
13 doi:10.1371/journal.pone.0136858  
14  
15 31 Karmacharya BM, Koju RP, LoGerfo JP, *et al.* Awareness, treatment and control of  
16 hypertension in Nepal: Findings from the Dhulikhel Heart Study. *Heart Asia* 2017;**9**:1–8.  
17 doi:10.1136/heartasia-2016-010766  
18  
19 32 Islam FM a, Bhuiyan a, Chakrabarti R, *et al.* Undiagnosed hypertension in a rural district  
20 in Bangladesh: The Bangladesh Population-based Diabetes and Eye Study (BPDES). *J*  
21 *Hum Hypertens* 2016;**30**:252–9. doi:10.1038/jhh.2015.65  
22  
23 33 Ataklte F, Erqou S, Kaptoge S, *et al.* Burden of undiagnosed hypertension in sub-saharan  
24 africa: A systematic review and meta-analysis. *Hypertension* 2015;**65**:291–8.  
25 doi:10.1161/HYPERTENSIONAHA.114.04394  
26  
27 34 Joshi SR, Saboo B, Vadivale M, *et al.* Prevalence of diagnosed and undiagnosed diabetes  
28 and hypertension in India-results from the screening India's twin epidemic (SITE) study.  
29 *Diabetes Technol Ther* 2012;**14**:8–15. doi:10.1089/dia.2011.0243  
30  
31 35 Li X, Xu J, Yao H, *et al.* Obesity and overweight prevalence and its association with  
32 undiagnosed hypertension in Shanghai population, China: A cross-sectional population-  
33 based survey. *Front Med China* 2012;**6**:322–8. doi:10.1007/s11684-012-0204-8  
34  
35 36 Zallman L, Himmelstein D, Woolhandler S, *et al.* Undiagnosed and Uncontrolled  
36 Hypertension and Hyperlipidemia among Immigrants in the US. *J Immigr Minor Heal*  
37 2013;**15**:858–65. doi:10.1007/s10903-012-9695-2.Undiagnosed  
38  
39 37 Choo EH, Ihm SH, Lim S, *et al.* A simple screening score for undiagnosed hypertension.  
40 *Int J Cardiol* 2014;**172**:e465–7. doi:10.1016/j.ijcard.2014.01.040  
41  
42 38 Abd Elaziz KM, Dewedar SA, Sabbour S, *et al.* Screening for hypertension among adults:  
43 Community outreach in Cairo, Egypt. *J Public Heal (United Kingdom)* 2015;**37**:701–6.  
44 doi:10.1093/pubmed/fdu085  
45  
46 39 Chor D, Pinho Ribeiro AL, Sá Carvalho M, *et al.* Prevalence, awareness, treatment and  
47 influence of socioeconomic variables on control of high blood pressure: Results of the  
48 ELSA-Brasil study. *PLoS One* 2015;**10**:1–14. doi:10.1371/journal.pone.0127382  
49  
50 40 Mosca I, Kenny RA. Exploring differences in prevalence of diagnosed, measured and  
51 undiagnosed hypertension: the case of Ireland and the United States of America. *Int J*  
52 *Public Health* 2014;**59**:759–67. doi:10.1007/s00038-014-0573-7  
53  
54 41 Saito Y, Davarian S, Takahashi A, *et al.* Diagnosis and Control of Hypertension in the  
55  
56  
57  
58  
59  
60

- 1  
2  
3 Elderly Populations of Japan and the United States. *Int J Popul Stud* 2015;**1**:19–28.  
4 doi:10.1016/j.physbeh.2017.03.040  
5
- 6 42 Marshall A, Nazroo J, Feeney K, *et al.* Comparison of hypertension healthcare outcomes  
7 among older people in the USA and England. *J Epidemiol Community Health*  
8 2016;**70**:264–70. doi:10.1136/jech-2014-205336  
9
- 10 43 World Health Organization. Multisectoral Action Plan on the Prevention and Control of  
11 NCD (2014-2020). 2014. <https://extranet.who.int/nutrition/gina/sites/default/files/NPL>  
12 2014 NCD Multisectoral Action Plan.pdf  
13
- 14 44 E. S, S. G, M.M. R, *et al.* Catastrophic household expenditure on health in Nepal: A cross-  
15 sectional survey. *Bull World Health Organ* 2014;**92**:760–7.  
16 doi:<http://dx.doi.org/10.2471/BLT.13.126615>  
17
- 18 45 Rakotz MK, Ewigman BG, Sarav M, *et al.* A technology-based quality innovation to  
19 identify undiagnosed hypertension among active primary care patients. *Ann Fam Med*  
20 2014;**12**:352–8. doi:10.1370/afm.1665  
21  
22  
23  
24  
25  
26  
27  
28  
29  
30  
31  
32  
33  
34  
35  
36  
37  
38  
39  
40  
41  
42  
43  
44  
45  
46  
47  
48  
49  
50  
51  
52  
53  
54  
55  
56  
57  
58  
59  
60



**Table 1:** Characteristics of the study participants

| Variables                 | Total       |      |           | Diagnosed hypertension |      |           | Undiagnosed hypertension |      |           | Chi-Square Statistic (p-value) |
|---------------------------|-------------|------|-----------|------------------------|------|-----------|--------------------------|------|-----------|--------------------------------|
|                           | n           | %    | 95% CI    | n                      | %    | 95% CI    | n                        | %    | 95% CI    |                                |
| <b>Overall</b>            | <b>3334</b> | --   | --        | 1634                   | 49.6 | 47.1-52.1 | 1700                     | 50.4 | 47.9-52.9 | --                             |
| <b>Age</b>                |             |      |           |                        |      |           |                          |      |           | 29.6317                        |
| 15-24                     | 237         | 6.6  | 5.6-7.8   | 107                    | 43.1 | 36.1-50.4 | 130                      | 56.9 | 49.6-63.9 | 0.0008                         |
| 25-34                     | 449         | 13.2 | 11.9-14.5 | 196                    | 43.8 | 38.4-49.3 | 253                      | 56.2 | 50.7-61.6 |                                |
| 35-44                     | 637         | 19.6 | 18-21.3   | 287                    | 45.2 | 40.1-50.3 | 350                      | 54.8 | 49.7-59.9 |                                |
| 45-54                     | 687         | 20.9 | 19.2-22.8 | 333                    | 49.4 | 45-53.8   | 354                      | 50.6 | 46.2-55   |                                |
| 55-64                     | 643         | 18.9 | 17.4-20.5 | 344                    | 54.7 | 49.8-59.5 | 299                      | 45.3 | 40.5-50.2 |                                |
| >=65                      | 681         | 20.8 | 19-22.7   | 367                    | 55.1 | 50.3-59.8 | 314                      | 44.9 | 40.2-49.7 |                                |
| <b>Sex</b>                |             |      |           |                        |      |           |                          |      |           | 18.35                          |
| Male                      | 1640        | 49.5 | 47.7-51.3 | 746                    | 45.8 | 42.6-49.1 | 894                      | 54.2 | 50.9-57.4 | 0.0003                         |
| Female                    | 1694        | 50.5 | 48.7-52.3 | 888                    | 53.3 | 50.1-56.4 | 806                      | 46.7 | 43.6-49.9 |                                |
| <b>BMI</b>                |             |      |           |                        |      |           |                          |      |           | 29.2511                        |
| Normal                    | 1816        | 53.6 | 51.2-56.1 | 841                    | 47.1 | 44.3-50   | 975                      | 52.9 | 50-55.7   | 0.0001                         |
| Thin                      | 361         | 11.1 | 9.9-12.5  | 156                    | 42.2 | 35.7-49   | 205                      | 57.8 | 51-64.3   |                                |
| Overweight/obese          | 1120        | 35.2 | 32.5-38   | 620                    | 55.6 | 51.7-59.5 | 500                      | 44.4 | 40.5-48.3 |                                |
| <b>Education</b>          |             |      |           |                        |      |           |                          |      |           | 6.5852                         |
| No education              | 1576        | 46.5 | 44.1-48.9 | 778                    | 50.9 | 47.5-54.4 | 798                      | 49.1 | 45.6-52.5 | 0.2125                         |
| Primary                   | 602         | 17.8 | 16.2-19.5 | 285                    | 46.1 | 41.1-51.1 | 317                      | 53.9 | 48.9-58.9 |                                |
| Secondary                 | 804         | 24.1 | 22.5-25.9 | 383                    | 48   | 43.6-52.4 | 421                      | 52   | 47.6-56.4 |                                |
| Higher                    | 350         | 11.5 | 9.9-13.5  | 187                    | 53   | 46.9-58.9 | 163                      | 47   | 41.1-53.1 |                                |
| <b>Wealth Quintile</b>    |             |      |           |                        |      |           |                          |      |           | 90.7085                        |
| Poorest                   | 610         | 15.5 | 13.3-18   | 211                    | 35.9 | 31.9-40   | 399                      | 64.1 | 60-68.1   | 0.0000                         |
| Poorer                    | 689         | 19.2 | 16.9-21.7 | 313                    | 44.2 | 39.8-48.7 | 376                      | 55.8 | 51.3-60.2 |                                |
| Middle                    | 604         | 17.3 | 15.2-19.6 | 301                    | 49.5 | 44.5-54.5 | 303                      | 50.5 | 45.5-55.5 |                                |
| Richer                    | 667         | 19.7 | 17.1-22.6 | 344                    | 50.2 | 44.9-55.5 | 323                      | 49.8 | 44.5-55.1 |                                |
| Richest                   | 764         | 28.3 | 24-33     | 465                    | 60.4 | 55.4-65.2 | 299                      | 39.6 | 34.8-44.6 |                                |
| <b>Place of residence</b> |             |      |           |                        |      |           |                          |      |           | 16.691                         |
| Urban                     | 2221        | 64.9 | 59.9-69.6 | 1152                   | 52.2 | 49-55.4   | 1069                     | 47.8 | 44.6-51   | 0.0057                         |
| Rural                     | 1113        | 35.1 | 30.4-40.1 | 482                    | 44.8 | 40.7-48.9 | 631                      | 55.2 | 51.1-59.3 |                                |
| <b>Ecological zone</b>    |             |      |           |                        |      |           |                          |      |           | 3.43                           |
| Mountain                  | 200         | 5.6  | 3.6-8.6   | 92                     | 47.1 | 39.4-54.8 | 108                      | 52.9 | 45.2-60.6 | 0.3721                         |
| Hill                      | 1694        | 49.9 | 44.2-55.6 | 788                    | 48.3 | 45.1-51.5 | 906                      | 51.7 | 48.5-54.9 |                                |
| Terai                     | 1440        | 44.5 | 39.2-49.9 | 754                    | 51.4 | 47.1-55.6 | 686                      | 48.6 | 44.4-52.9 |                                |
| <b>Province</b>           |             |      |           |                        |      |           |                          |      |           | 23.7869                        |
| Province 1                | 490         | 17   | 15.2-19   | 265                    | 53   | 47.7-58.3 | 225                      | 47   | 41.7-52.3 | 0.0511                         |
| Province 2                | 460         | 16.2 | 14.2-18.3 | 243                    | 53.1 | 46.5-59.6 | 217                      | 46.9 | 40.4-53.5 |                                |
| Province 3                | 575         | 26   | 21.8-30.6 | 303                    | 52.7 | 46.8-58.5 | 272                      | 47.3 | 41.5-53.2 |                                |

1  
2  
3  
4  
5  
6  
7  
8  
9  
10  
11  
12  
13  
14  
15  
16  
17  
18  
19  
20  
21  
22  
23  
24  
25  
26  
27  
28  
29  
30  
31  
32  
33  
34  
35  
36  
37  
38  
39  
40  
41  
42  
43  
44  
45  
46  
47  
48  
49  
50  
51  
52  
53  
54  
55  
56  
57  
58  
59  
60

|                             |      |      |           |      |      |           |      |      |           |        |
|-----------------------------|------|------|-----------|------|------|-----------|------|------|-----------|--------|
| Province 4                  | 578  | 13.2 | 11.5-15.1 | 273  | 46.9 | 42-51.7   | 305  | 53.1 | 48.3-58   |        |
| Province 5                  | 553  | 17.8 | 15.4-20.4 | 253  | 45.4 | 39-51.9   | 300  | 54.6 | 48.1-61   |        |
| Province 6                  | 343  | 3.9  | 3.3-4.6   | 148  | 39.8 | 32.9-47.1 | 195  | 60.2 | 52.9-67.1 |        |
| Province 7                  | 335  | 6    | 5-7.2     | 149  | 41.9 | 33.8-50.5 | 186  | 58.1 | 49.5-66.2 |        |
| <b>Caffeine consumption</b> |      |      |           |      |      |           |      |      |           | 0.2587 |
| No                          | 2942 | 88.4 | 86.7-89.9 | 1434 | 49.4 | 46.9-52.0 | 1508 | 50.6 | 48.0-53.1 | 0.6895 |
| Yes                         | 392  | 11.6 | 10.1-13.3 | 200  | 50.8 | 44.1-57.4 | 192  | 49.2 | 42.6-55.8 |        |
| <b>Tobacco use</b>          |      |      |           |      |      |           |      |      |           | 5.3524 |
| No                          | 2826 | 84.9 | 83.2-86.6 | 1410 | 50.4 | 47.8-53.1 | 1416 | 49.6 | 46.9-52.2 | 0.0338 |
| Yes                         | 508  | 15.1 | 13.5-16.8 | 224  | 44.8 | 40.0-49.8 | 284  | 55.1 | 50.2-60.0 |        |
| <b>Alcohol consumption</b>  |      |      |           |      |      |           |      |      |           | 2.4122 |
| No                          | 3249 | 97.8 | 97.1-98.4 | 1600 | 49.8 | 47.2-52.8 | 1649 | 50.2 | 47.6-52.8 | 0.1505 |
| Yes                         | 85   | 2.2  | 1.6-2.9   | 34   | 40.6 | 29.4-52.9 | 51   | 59.4 | 47.1-70.6 |        |

Note: n = Number of sample, CI = Confidence interval

**Figure 1:** Determinants of undiagnosed hypertension among patients with hypertension in Nepal, 2016

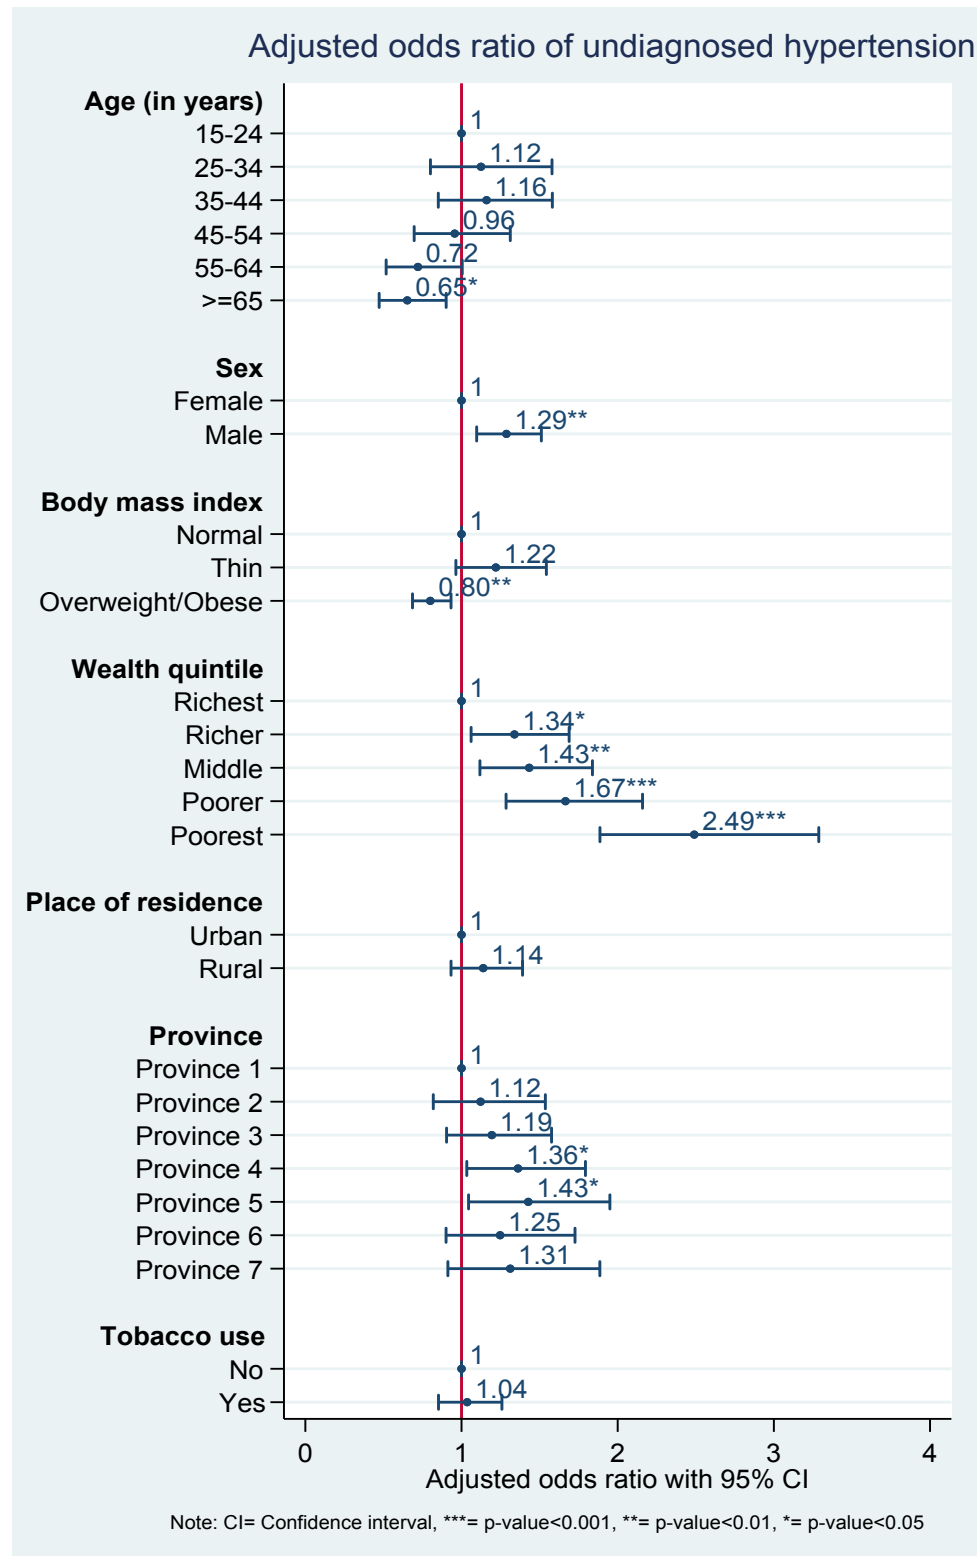

**Figure 2:** Concentration curve to measure the wealth-based inequality in the prevalence of undiagnosed hypertension among patients with hypertension in Nepal, 2016

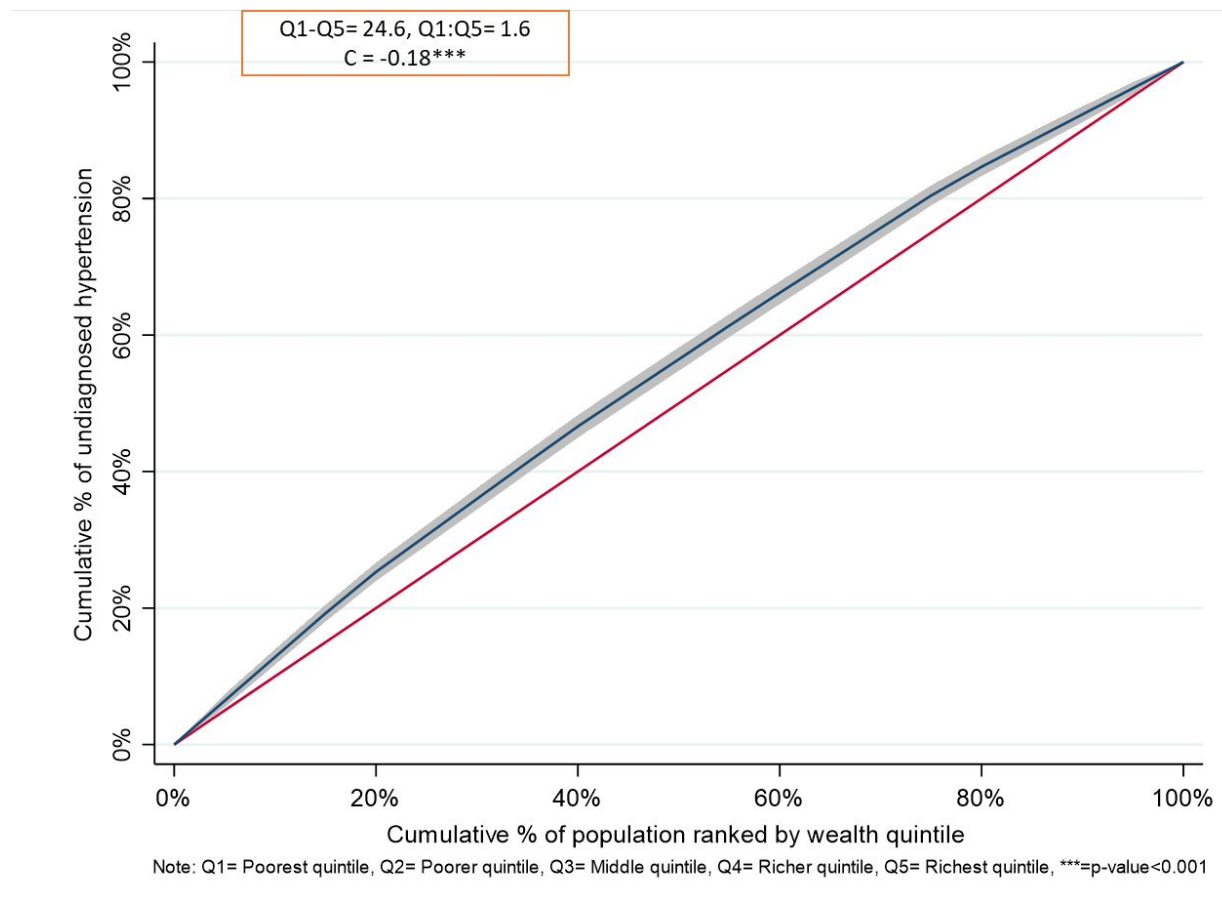

**Figure 3:** Socioeconomic inequalities in the prevalence of undiagnosed hypertension among patients with hypertension across geographical locations in Nepal, 2016

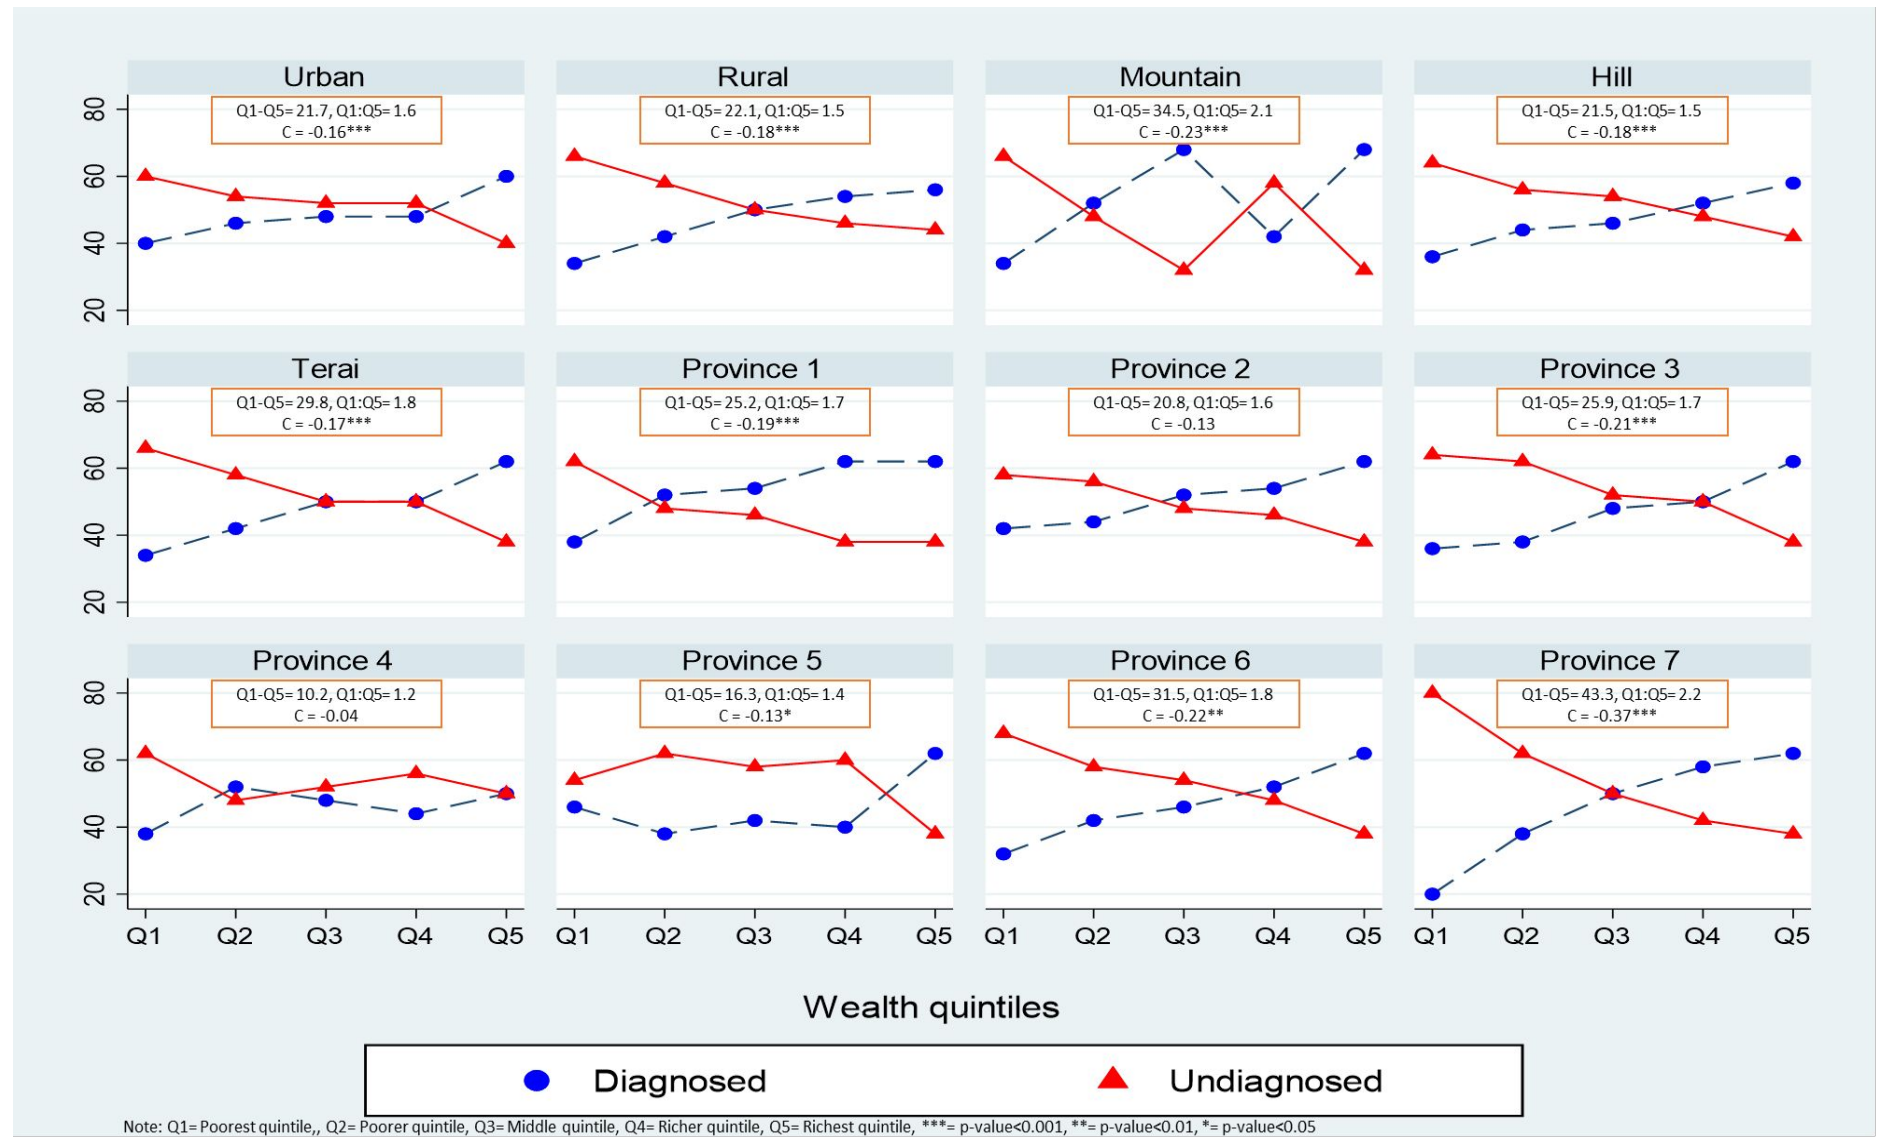

**Supplementary Table 1:** Unadjusted determinants of undiagnosed hypertension among patients with hypertension in Nepal, 2016

| Variables                 | COR  | 95% CI    | <i>p</i> -value |
|---------------------------|------|-----------|-----------------|
| <b>Age</b>                |      |           |                 |
| 15-24                     | 1    |           |                 |
| 25-34                     | 1.06 | 0.77-1.46 | 0.7090          |
| 35-44                     | 1.00 | 0.75-1.34 | 0.9800          |
| 45-54                     | 0.87 | 0.65-1.18 | 0.3760          |
| 55-64                     | 0.72 | 0.52-0.98 | 0.0400          |
| >=65                      | 0.70 | 0.52-0.96 | 0.0250          |
| <b>Sex</b>                |      |           |                 |
| Male                      | 1.32 | 1.14-1.53 | 0.0000          |
| Female                    | 1    |           |                 |
| <b>BMI</b>                |      |           |                 |
| Normal                    | 1    |           |                 |
| Thin                      | 1.13 | 0.91-1.41 | 0.2610          |
| Overweight/obese          | 0.70 | 0.6-0.8   | 0.0000          |
| <b>Education</b>          |      |           |                 |
| No education              | 1    |           |                 |
| Primary                   | 1.08 | 0.9-1.31  | 0.4010          |
| Secondary                 | 1.07 | 0.88-1.3  | 0.4790          |
| Higher                    | 0.85 | 0.66-1.09 | 0.2070          |
| <b>Wealth Quintile</b>    |      |           |                 |
| Poorest                   | 2.94 | 2.29-3.77 | 0.0000          |
| Poorer                    | 1.87 | 1.47-2.38 | 0.0000          |
| Middle                    | 1.57 | 1.23-1.99 | 0.0000          |
| Richer                    | 1.46 | 1.16-1.84 | 0.0010          |
| Richest                   | 1    |           |                 |
| <b>Place of residence</b> |      |           |                 |
| Urban                     | 1    |           |                 |
| Rural                     | 1.41 | 1.17-1.71 | 0.0000          |
| <b>Ecological zone</b>    |      |           |                 |
| Mountain                  | 1    |           |                 |
| Hill                      | 0.98 | 0.68-1.41 | 0.9100          |
| Terai                     | 0.78 | 0.53-1.12 | 0.1800          |
| <b>Province</b>           |      |           |                 |
| Province 1                | 1    |           |                 |
| Province 2                | 1.05 | 0.77-1.44 | 0.7540          |
| Province 3                | 1.06 | 0.78-1.44 | 0.7220          |
| Province 4                | 1.32 | 1-1.74    | 0.0530          |
| Province 5                | 1.40 | 1.01-1.92 | 0.0400          |
| Province 6                | 1.55 | 1.09-2.2  | 0.0140          |

|                             |      |           |        |
|-----------------------------|------|-----------|--------|
| Province 7                  | 1.47 | 0.99-2.18 | 0.0550 |
| <b>Caffeine consumption</b> |      |           |        |
| No                          | 1.00 |           |        |
| Yes                         | 0.91 | 0.72-1.15 | 0.4400 |
| <b>Tobacco consumption</b>  |      |           |        |
| No                          | 1.00 |           |        |
| Yes                         | 1.26 | 1.06-1.51 | 0.0100 |
| <b>Alcohol consumption</b>  |      |           |        |
| No                          | 1.00 |           |        |
| Yes                         | 1.46 | 0.91-2.32 | 0.1140 |

Note: COR= Crude Odds Ratio, CI= Confidence Interval

# BMJ Open

## Examining the prevalence, correlates and inequalities of undiagnosed hypertension in Nepal: a population-based cross-sectional study

|                                 |                                                                                                                                                                                                                                                                                                                                                                                                                                                                                                                                                                                                                                                                                                                                                                        |
|---------------------------------|------------------------------------------------------------------------------------------------------------------------------------------------------------------------------------------------------------------------------------------------------------------------------------------------------------------------------------------------------------------------------------------------------------------------------------------------------------------------------------------------------------------------------------------------------------------------------------------------------------------------------------------------------------------------------------------------------------------------------------------------------------------------|
| Journal:                        | <i>BMJ Open</i>                                                                                                                                                                                                                                                                                                                                                                                                                                                                                                                                                                                                                                                                                                                                                        |
| Manuscript ID                   | bmjopen-2020-037592.R1                                                                                                                                                                                                                                                                                                                                                                                                                                                                                                                                                                                                                                                                                                                                                 |
| Article Type:                   | Original research                                                                                                                                                                                                                                                                                                                                                                                                                                                                                                                                                                                                                                                                                                                                                      |
| Date Submitted by the Author:   | 14-Apr-2020                                                                                                                                                                                                                                                                                                                                                                                                                                                                                                                                                                                                                                                                                                                                                            |
| Complete List of Authors:       | Hasan, Md. Mehedi ; The University of Queensland Institute for Social Science Research,<br>Tasnim, Fariha; International Centre for Diarrhoeal Disease Research Bangladesh, Maternal and Child Health Division<br>Tariqujjaman, Md.; International Centre for Diarrhoeal Disease Research Bangladesh, Nutrition and Clinical Services Division<br>Ahmed, Sayem; Liverpool School of Tropical Medicine, Department of Tropical Biology; International Centre for Diarrhoeal Disease Research Bangladesh, Health Systems and Population Studies Division<br>Mamun, Abdullah; University of Queensland, Institute for Social Science Research; University of Queensland, ARC Centre of Excellence for Children and Families over the Life Course (The Life Course Centre) |
| <b>Primary Subject Heading</b>: | Epidemiology                                                                                                                                                                                                                                                                                                                                                                                                                                                                                                                                                                                                                                                                                                                                                           |
| Secondary Subject Heading:      | Public health                                                                                                                                                                                                                                                                                                                                                                                                                                                                                                                                                                                                                                                                                                                                                          |
| Keywords:                       | Hypertension < CARDIOLOGY, Public health < INFECTIOUS DISEASES, EPIDEMIOLOGY                                                                                                                                                                                                                                                                                                                                                                                                                                                                                                                                                                                                                                                                                           |
|                                 |                                                                                                                                                                                                                                                                                                                                                                                                                                                                                                                                                                                                                                                                                                                                                                        |

SCHOLARONE™  
Manuscripts





I, the Submitting Author has the right to grant and does grant on behalf of all authors of the Work (as defined in the below author licence), an exclusive licence and/or a non-exclusive licence for contributions from authors who are: i) UK Crown employees; ii) where BMJ has agreed a CC-BY licence shall apply, and/or iii) in accordance with the terms applicable for US Federal Government officers or employees acting as part of their official duties; on a worldwide, perpetual, irrevocable, royalty-free basis to BMJ Publishing Group Ltd ("BMJ") its licensees and where the relevant Journal is co-owned by BMJ to the co-owners of the Journal, to publish the Work in this journal and any other BMJ products and to exploit all rights, as set out in our [licence](#).

The Submitting Author accepts and understands that any supply made under these terms is made by BMJ to the Submitting Author unless you are acting as an employee on behalf of your employer or a postgraduate student of an affiliated institution which is paying any applicable article publishing charge ("APC") for Open Access articles. Where the Submitting Author wishes to make the Work available on an Open Access basis (and intends to pay the relevant APC), the terms of reuse of such Open Access shall be governed by a Creative Commons licence – details of these licences and which [Creative Commons](#) licence will apply to this Work are set out in our licence referred to above.

Other than as permitted in any relevant BMJ Author's Self Archiving Policies, I confirm this Work has not been accepted for publication elsewhere, is not being considered for publication elsewhere and does not duplicate material already published. I confirm all authors consent to publication of this Work and authorise the granting of this licence.

**Title:** Examining the prevalence, correlates and inequalities of undiagnosed hypertension in Nepal: a population-based cross-sectional study

**Authors:** Md. Mehedi Hasan<sup>1,2\*</sup>, Fariha Tasnim<sup>3</sup>, Md. Tariqujjaman<sup>4</sup>, Sayem Ahmed<sup>5-7</sup> and Abdullah A Mamun<sup>1,2</sup>

### Author affiliations

<sup>1</sup> Institute for Social Science Research, The University of Queensland, Indooroopilly, Queensland 4068, Australia

<sup>2</sup> ARC Centre of Excellence for Children and Families over the Life Course (The Life Course Centre), The University of Queensland, Indooroopilly, Queensland 4068, Australia

<sup>3</sup> Maternal and Child Health Division, International Centre for Diarrhoeal Disease Research, Bangladesh (icDDR,b), Dhaka, Bangladesh

<sup>4</sup> Nutrition and Clinical Services Division, International Centre for Diarrhoeal Disease Research, Bangladesh (icDDR,b), Dhaka, Bangladesh

<sup>5</sup> Department of Tropical Biology, Liverpool School of Tropical Medicine, Liverpool, United Kingdom

<sup>6</sup> Health Systems and Population Studies Division, International Centre for Diarrhoeal Disease Research, Bangladesh (icDDR,b), Dhaka, Bangladesh

<sup>7</sup> Health Economics and Policy Research Group, Department of Learning, Informatics, Management and Ethics, Karolinska Institutet, Stockholm, Sweden

\* Correspondence:

Md. Mehedi Hasan

Institute for Social Science Research

ARC Centre of Excellence for Children and Families over the Life Course

The University of Queensland

80 Meiers Road, Long Pocket Precinct, Indooroopilly, Queensland 4068, Australia

Phone: +61 470 237 155

Fax: + 61 7 334 67646

E-mail: [m.m.hasan@uqconnect.edu.au](mailto:m.m.hasan@uqconnect.edu.au)

## ABSTRACT

**Objective:** To examine the prevalence, correlates and socio-demographic inequalities of undiagnosed hypertension in Nepal.

**Design:** This study used cross-sectional 2016 Nepal Demographic and Health Survey (NDHS) data. We defined a hypertensive patient to remain undiagnosed if at the survey he/she was diagnosed as hypertensive (systolic blood pressure  $\geq 140$  mmHg or diastolic blood pressure  $\geq 90$  mmHg) but never took any prescribed anti-hypertensive medicine to lower/control blood pressure and never told by health professionals to have hypertension prior the survey. Multiple binary logistic regression analysis was performed, and Concentration Index was measured.

**Setting:** Nepal

**Participants:** Adult patients with hypertension

**Results:** Among 3334 hypertensive patients, 50.4% remained undiagnosed during the survey in Nepal. Adjusted model reveals that patients who were male, belonged to households other than richest quintile, and lived in Province 4 and Province 5 were at higher risk and patients who were 65+ years of age and were overweight/obese were at lower risk of remaining undiagnosed for hypertension. The poor-rich gap was 24.6 percentage points (Q1= 64.1% vs Q5= 39.6%) and poor:rich ratio was 1.6 (Q1/Q5= 1.6) in the prevalence of undiagnosed hypertension. Undiagnosed hypertension was disproportionately distributed among socioeconomically worse-off Nepalese patients (Concentration Index, C= -0.18). Inequalities in the prevalence of undiagnosed hypertension further varied across other geographic locations including place of residence, ecological zones and administrative provinces.

**Conclusions:** Undiagnosed hypertension was highly prevalent in Nepal and there were substantial inequalities by socio-demographics and sub-national levels. Increasing awareness, strengthening

1  
2  
3 routine screening to diagnose hypertension at primary health service facilities and enactment of  
4  
5 social health insurance policy may help Nepal to prevent and control this burden.  
6  
7

8 **Keywords:** Undiagnosed hypertension, Inequality, Demographic and Health Survey, Nepal  
9  
10

#### 11 **Strengths and limitations of this study**

#### 12

- 13 • This study determined the prevalence and correlates of undiagnosed hypertension in  
14  
15 Nepal using the most updated population-based nationally representative data.
- 16 • This study measured both wealth-based absolute and relative inequalities in the  
17  
18 prevalence of undiagnosed hypertension at national level as well as across place of  
19  
20 residence, ecological zones and administrative provinces.
- 21 • The cross-sectional nature of the data limits us to measure causal association between  
22  
23 undiagnosed hypertension and the explanatory variables studied.
- 24 • The association of some potential behavioral or lifestyle factors such as physical  
25  
26 activity, dietary patterns and family history with undiagnosed hypertension remain  
27  
28 unmeasured due to lack of information.  
29  
30  
31  
32  
33  
34  
35  
36  
37  
38  
39  
40  
41  
42  
43  
44  
45  
46  
47  
48  
49  
50  
51  
52  
53  
54  
55  
56  
57  
58  
59  
60

## INTRODUCTION

Hypertension or raised blood pressure is recognized as a leading cause of mortality and disability [1], affecting more than one billion people every year worldwide [2]. Globally, hypertension is a directing factor for cardiovascular diseases (CVDs), specially heart diseases, myocardial infarctions, kidney failure, strokes, disability and premature deaths [2,3]. In South-East Asian countries including Nepal, hypertension affects one out of three adults, which accounts for nearly 1.5 million adult deaths annually; and 9.4% of the total deaths [4]. Studies identified, more than 50% people having hypertension remained undiagnosed in South-East Asian region [5]. Among South Asian countries, Nepal has one of the highest prevalence of hypertension [6].

Currently, Nepal is facing an epidemiological transition with increasing prevalence of hypertension [7]. Several studies reported the prevalence of hypertension in Nepal. A study based on the Nepal Demographic and Health Survey 2016 reported about 20% Nepalese adults (aged  $\geq$  18 years) had hypertension [8]. Other studies reported the prevalence of hypertension ranges from 23% to 34% in Nepal [7,9–12]. However, some of these assessments were older and did not represent national scenario. In 2013, the national NCD risk factor survey showed about 25.7% adults aging 15-69 years had hypertension in Nepal [13]. This survey also found that a large number of (42.7%) adults had never measured their blood pressure. For prevention, control and proper treatment of hypertension, it is prior need to correctly diagnose this disease. In addition, failure to early diagnosis and treatment of hypertension may lead to serious health hazards, disability in the later life, or eventually deaths. Number of government, non-government and private health facilities are providing health services including diagnosis, medication and treatment for hypertension. However, the existing health systems of Nepal is not ready for diagnosis,

1  
2  
3 treatment and control of hypertension especially for the mass people at the community level  
4  
5 indicating the challenges to tackle this burden [14].  
6  
7

8 To prevent hypertension, the disease needs to be diagnosed first before any related complications  
9  
10 arise. However, there is lack of evidence about the prevalence of undiagnosed hypertension in  
11  
12 Nepal at national and subnational levels. The estimates of undiagnosed hypertension, and its socio-  
13  
14 demographic inequalities at national and subnational level may help the policy makers for  
15  
16 formulating effective strategies for screening, treatment and control as well as prevention of such  
17  
18 burden by identifying the most vulnerable groups. Therefore, given the importance of this burden,  
19  
20 we aimed to examine the prevalence, correlates and socio-demographic inequalities of  
21  
22 undiagnosed hypertension in Nepal.  
23  
24  
25  
26  
27  
28  
29

## 30 **METHODS**

### 31 **Data source**

32  
33  
34 We used the most updated nationally representative cross-sectional data from Nepal Demographic  
35  
36 and Health Survey (NDHS). Though the data of Demographic and Health Surveys is managed by  
37  
38 Measure Evaluation, the NDHS was conducted from June 2016 to January 2017 by a private  
39  
40 research organization named “NEW ERA” under the monitoring and supervision of the Ministry  
41  
42 of Health, Nepal. To estimate the prevalence of hypertension nationally in Nepal, the NDHS 2016  
43  
44 obtained informed consent from the household head on behalf of all household members of each  
45  
46 surveyed households [15]. For academic and scientific purposes, this anonymous dataset without  
47  
48 any identifiers was made available by the ICF International, Maryland, United States [15]. We  
49  
50 obtained approval with access to use the data to conduct this study.  
51  
52  
53  
54  
55  
56  
57  
58  
59  
60

## Survey procedure and participants

In 2015, Nepal declared some new places to fall under municipalities and some municipalities have been reformed [8]. After these changes, Nepal has been divided into seven administrative provinces comprising several districts under each province and urban-rural areas. These urban and rural areas were divided into small administrative units as wards. Because of having comparatively greater number of households in urban areas, the urban area was further divided into enumeration area (EA). The primary sampling unit (PSU) were wards for both urban and rural areas [15]. Because of some changes in administrative areas, Nepal revised the sampling frame of National Population and Housing Census (NPHC). The 2016 NDHS used this revised sampling frame and applied a multistage survey that respectively conducted in two and three stages in rural and urban areas. NDHS selected the PSUs proportionately to the size in the first stage and then the random selection of EAs from the systematic selection of households from each PSU in second stage. In third stage, the households were selected by using stratified cluster sampling technique in urban setting. A detailed description about the methodology is available elsewhere [15]. A total of 11490 households were selected from 383 wards, of which 5520 households from 184 wards were from urban settings and 5970 households from 199 wards were from rural settings. From these households, all the residents whose age 15 years or above were eligible for the measurement of blood pressure. With an overall 95% response rate, a total of 14823 individuals participated in the survey. The participants of this study were males and females with hypertension of ages 15 years or older. A total of 3334 patients of both sexes were included in this study. A step by step procedure of selecting study sample has shown in Figure 1.

**{Figure 1 will be added here}**

## Outcome variable

To measure hypertension, the 2016 NDHS used the UA-767F/FAC (A&D Medical) automated device to record the blood pressure of the participants. With 5 minutes intervals between each measurement, the 2016 NDHS recorded the measurements of blood pressure for three times in a sitting position. NDHS considered the last two measures of blood pressure levels and used their mean to detect hypertension. The survey used the World Health Organization (WHO) guidelines to report a participant as hypertensive [15]. This guideline has integrated the 2017 guidelines of the American College of Cardiology/ American Society of Hypertension [16,17]. According to the guideline, a participant with systolic blood pressure (SBP)  $\geq 140$  mmHg or diastolic blood pressure (DBP)  $\geq 90$  mmHg is diagnosed as a hypertension case. We also considered participants as patients of hypertension if s/he was previously told by health professional to have hypertension or taking medication to control hypertension. Our outcome variable is undiagnosed hypertension. A patient is considered as undiagnosed for hypertension if at the survey time he/she was diagnosed as hypertensive (SBP  $\geq 140$  mmHg or DBP  $\geq 90$  mmHg) but never took any prescribed anti-hypertensive medicine to lower/control blood pressure and never told by health professionals to have hypertension prior the survey [18,19].

## Explanatory variables

This study considered a set of socio-demographic and behavioral characteristics as independent variables. Age (in years), sex, Body Mass Index (BMI) measured through dividing the weight by squared height ( $\text{kg}/\text{m}^2$ ), education level, household wealth status, place of residence, ecological zone, and provinces were considered as socio-demographic characteristics of the patients. Age was categorized as 15-24, 25-34, 35-44, 45-54, 55-64 and  $\geq 65$  years. Sex had two categories, male and female. The BMI was categorized as thin/underweight (BMI  $< 18.5$   $\text{kg}/\text{m}^2$ ), normal (18.5  $\text{kg}/\text{m}^2$



1  
2  
3  $\leq \text{BMI} < 25 \text{ kg/m}^2$ ) and overweight/obese ( $\text{BMI} \geq 25.0 \text{ kg/m}^2$ ) [20]. Based on the highest class  
4 completed by the respondents, level of education was classified as no education, primary,  
5 secondary and higher. NDHS used principal component analysis [15] to construct the wealth index  
6 to desegregate the households into five socioeconomic quintiles (poorest, poorer, middle, richer  
7 and richest). The place of residence was stratified as urban and rural across all geographic location.  
8 Nepal was ecologically divided in Mountain, Hill and Terai. Using 2015 reformation, 7  
9 administrative provinces were considered as Province 1, Province 2, Province 3, Province 4,  
10 Province 5, Province 6 and Province 7. Three behavioral characteristics of respondents, caffeine,  
11 tobacco and alcohol consumption were considered as independent variables each of which  
12 contained dichotomous response on whether respondent consume caffeine, tobacco or alcohol.  
13  
14  
15  
16  
17  
18  
19  
20  
21  
22  
23  
24  
25  
26

### 27 **Statistical analyses**

28  
29 We described the prevalence of undiagnosed hypertension and background characteristics of the  
30 study patients by using univariate analysis technique. The estimates of each of the categorical  
31 variables included in this study were reported with numbers, weighted percentages and 95%  
32 confidence intervals (CIs) of estimates. The weighted prevalence of undiagnosed hypertension was  
33 determined across the background characteristics of the study patients from bivariate analysis.  
34 Statistical significance was detected by applying Chi-square test. Then, we conducted simple and  
35 multiple binary logistic regression analyses to examine the correlates of undiagnosed hypertension.  
36 The results of the regression analysis were presented in terms of odds ratio with respective 95%  
37 CI. Variables that were statistically significant in simple logistic regression analysis were entered  
38 in the multiple regression model to estimate the adjusted odds ratio (AOR). Notably, the statistical  
39 significance was defined at 5% level ( $p\text{-value} < 0.05$ ). Variance inflation factors to detect  
40 multicollinearity among the independent variables were assessed before incorporating them into  
41  
42  
43  
44  
45  
46  
47  
48  
49  
50  
51  
52  
53  
54  
55  
56  
57  
58  
59  
60

1  
2  
3 the multiple regression model. Due to hierarchical structure of NDHS data, we considered the  
4 cluster sampling design of the 2016 NDHS to estimate the prevalence and determinants in this  
5 study [15]. We excluded cases with missing values for blood pressure measurements.  
6  
7

8  
9  
10 Proposed by Wagstaff [21] to measure the inequality, we estimated the concentration index (C),  
11 to show the degree and direction of wealth-based inequality in undiagnosed hypertension  
12 prevalence. For the purpose of calculating C, the households were ranked from the poorest to the  
13 richest according to their socioeconomic characteristics. We plotted a concentration curve to  
14 portray the distribution of undiagnosed hypertension. The Y-axis of the concentration curve  
15 representing the cumulative proportion of undiagnosed hypertension and the X-axis represents the  
16 cumulative proportions of the population across wealth quintiles. When the concentration curve  
17 coincide with the diagonal, the prevalence of undiagnosed hypertension is treated as equally  
18 distributed across socioeconomic groups. In contrast, the concentration curve typically deviate  
19 from the diagonal if there exist inequalities in the prevalence of undiagnosed hypertension. The C  
20 is defined as twice the area between the concentration curve and the diagonal [22–24]. The index  
21 value can range between  $-1$  and  $+1$ , a positive value implies the prevalence of undiagnosed  
22 hypertension is more concentrated among the better-off socioeconomic group and a negative value  
23 implies the prevalence is more concentrated among less affluent group [23,25]. We repeat the  
24 estimation of C across other geographical locations such as place of residence, ecological zones  
25 and provinces to detect the group of patients with highest severity of socioeconomic inequalities  
26 in the prevalence of undiagnosed hypertension. STATA (version 13) was used to perform all the  
27 analyses [26].  
28  
29  
30  
31  
32  
33  
34  
35  
36  
37  
38  
39  
40  
41  
42  
43  
44  
45  
46  
47  
48  
49  
50  
51  
52  
53  
54  
55  
56  
57  
58  
59  
60

## Patient and public involvement

Patients and public were not involved in developing the research questions, measuring outcome and designing the study. Information of the participants were anonymous.

## RESULTS

### General Characteristics of the Study Participants

**Table 1** shows the general characteristics of the study participants. Among the patients studied, the average age of patients was 49.8 years (95% CI 49.1, 50.5) with the lowest percentage of patients belonged to 15-24 years age group (6.6%) and highest percentage of patients belonged to 45-54 years age group (20.9%). Numbers of males (49.5%) and females (50.5%) in the sample were almost equal. Nearly half of the patients were normal in terms of their BMI while more than one third of the patients were overweight/obese. Though two-third of the patients resided in urban area (64.9%), the educational status of the patients were poor. Nearly half of the patients had no education while 24.1% and 11.5% had secondary and higher education respectively. The highest number of patients belonged to richest wealth quintile (28.3%) and the lowest number of patients belonged to the poorest wealth quintile (15.5%). Also, the highest number of patients were from province 3 (26.0%) followed by province 5 (17.8%) and province 1 (17.0%). However, only 5.6% of the patients were from mountain ecological zone.

**{Table 1 will be added here}**

## Prevalence of Undiagnosed Hypertension

Among 3334 participants who had hypertension during the survey, more than half of them were detected as remaining undiagnosed (50.4%). The prevalence of undiagnosed hypertension among the patients varied across their age ( $p$ -value < 0.001), sex ( $p$ -value < 0.001), BMI ( $p$ -value < 0.001), wealth quintile ( $p$ -value < 0.001) and place of residence ( $p$ -value < 0.01). The prevalence of undiagnosed hypertension were higher among patients with 15-24 years age group and steadily decreasing with the increase of age. The prevalence of undiagnosed hypertension was higher among male patients (54.2%) than female (46.7%). Compare to patients with normal BMI, the prevalence of undiagnosed hypertension was higher among thin patients (57.8%) and lower among overweight/obese patients (44.4%). Compare to patients of the richest wealth quintile (39.6%), the prevalence of undiagnosed hypertension was higher among patients of the poorest (64.1%) and poorer (55.8%) quintiles. The rate of undiagnosed hypertension was higher among rural patients (55.2%) compare to urban (47.8%). No educational, ecological and provincial variations in the prevalence of undiagnosed hypertension was observed (**Table 1**).

## Correlates of Undiagnosed Hypertension

We found that patient's age, sex, BMI, wealth quintile, place of residence and province were significantly associated with the prevalence of undiagnosed hypertension among hypertensive patients in unadjusted logistic regression analysis (see **supplementary**).

**Figure 2** represents the results of multiple logistic regression analysis. The multiple binary logistic regression model showed that patient's age, sex, BMI, wealth quintile and province had significant association with undiagnosed hypertension. Elderly patients  $\geq 65$  years of age had a lower

1  
2  
3 likelihood of being undiagnosed for hypertension than patients with age 15-24 years (Adjusted  
4 Odds Ratio, AOR = 0.65; 95% CI 0.48, 0.91). Male patients were 1.29 times more likely than  
5  
6 female patients to remain undiagnosed for hypertension (AOR = 1.29, 95% CI 1.11, 1.51).  
7  
8 Compare to patients with normal BMI, overweight/obese patients (AOR = 0.80, 95% CI 0.69,  
9  
10 0.93) were less likely to have undiagnosed hypertension.  
11  
12  
13  
14

15 We found wealth quintiles as potential correlates of undiagnosed hypertension. The risk of  
16  
17 remaining undiagnosed for hypertension was increasing with the decrease of patient's  
18  
19 socioeconomic status. Patients with a poorer socioeconomic status had higher chance of having  
20  
21 undiagnosed hypertension compared to higher socioeconomic quintiles. Patients of poorest and  
22  
23 poorer wealth quintiles were 2.49 (AOR = 2.49; 95% CI 1.90, 3.30) and 1.67 (AOR = 1.67; 95%  
24  
25 CI 1.29, 2.16) times more likely to have an undiagnosed hypertension condition than patients of  
26  
27 richest wealth quintile.  
28  
29  
30  
31

32 Moreover, significant provincial variation was evident in the prevalence of undiagnosed  
33  
34 hypertension among hypertensive patients. Patients of province 4 (AOR = 1.36, 95% CI 1.04, 1.79)  
35  
36 and province 5 (AOR = 1.43, 95% CI 1.05, 1.95) were more likely to had undiagnosed  
37  
38 hypertension than patients of province 1.  
39  
40  
41

42 {Figure 2 will be added here}  
43  
44

### 45 **Socioeconomic Inequalities in Undiagnosed Hypertension**

46  
47

48 **Figure 3** depicts the inequalities in the prevalence of undiagnosed hypertension among  
49  
50 hypertensive patients. The absolute poor (Q1) - rich (Q5) difference in the distribution of  
51  
52 undiagnosed hypertension was 24.6% between poorest and richest, meaning that the prevalence of  
53  
54 undiagnosed hypertension was greater by 24.6 percentage points among the poorest. The relative  
55  
56  
57  
58  
59  
60

1  
2  
3 measure of inequality in terms of poor (Q1): rich (Q5) ratio was 1.6 for the prevalence of  
4 undiagnosed hypertension among patients, depicting that the prevalence of undiagnosed  
5 hypertension was higher by 1.6 times among the poorest than richest. We found negative value of  
6 the Concentration Index ( $C = -0.18$ ) which represents that the prevalence of undiagnosed  
7 hypertension among hypertensive patients was disproportionately distributed among worse-off  
8 socioeconomic groups.  
9

10  
11  
12  
13  
14  
15  
16  
17  
18 **{Figure 3 will be added here}**  
19

20 In addition, patients living in mountain and in province 7 had large gaps in the prevalence of  
21 undiagnosed hypertension (**Figure 4**). The higher Q1:Q5 ratio were observed among those who  
22 had large Q1-Q5 gaps in the prevalence of undiagnosed hypertension across different geographic  
23 locations. We found large negative values of  $C$  among those who had higher Q1-Q5 gaps and  
24 Q1:Q5 ratio for the prevalence of undiagnosed hypertension. See **Figure 4** for details.  
25  
26  
27  
28  
29  
30  
31

32  
33 **{Figure 4 will be added here}**  
34  
35  
36  
37

## 38 **DISCUSSION**

39  
40 Globally few studies have been conducted on undiagnosed hypertension to date. Utilizing NDHS  
41 2016 data, this study intended to estimate the prevalence of undiagnosed hypertension. In addition,  
42 the risk factors and inequalities associated with it among Nepalese hypertensive patients were  
43 identified. About half of the biomarker partakers were found hypertension positive who were not  
44 screened/diagnosed before the survey. Patients unwillingness for regular check-up before any  
45 health complication arises due to lack of awareness as well as inaccessibility to screening services  
46 may direct this high prevalence [27]. Gap in knowledge, attitude and practice of healthy lifestyle  
47  
48  
49  
50  
51  
52  
53  
54  
55  
56  
57

1  
2  
3 as preventive measure to non-communicable diseases (NCDs) may also act as a driver of  
4 undiagnosed hypertension [27–29]. Community-based awareness on changing lifestyle to address  
5 the burden of NCDs from the society as a whole might be effective in reducing this gap [30].  
6  
7

8  
9  
10 Several studies reported higher risk of hypertension among people who were older in age, male,  
11 urban dwellers, had higher education level, regular consumer of tobacco and alcohol, and who are  
12 overweight [6,8,28,29]. In contrast, we found that patients aged 65+ years and who were  
13 overweight/obese were at lower risk of remaining undiagnosed from this disease. However, our  
14 findings depicted greater proportion of undiagnosed patients among those who were young and  
15 physically thin. Young or underweight people are less conscious about their health status as they  
16 might have the misconception that they are less likely to suffer from NCDs [31]. Nonetheless,  
17 richest are more aware than the poorest people about the health hazards, typically have greater  
18 access for screening diseases and can have the ability to afford treatment cost for the diseases in  
19 Nepal [28]. This could lead the poor than the rich to be more exposed to undiagnosed hypertension.  
20  
21

22  
23  
24 On the other hand, similar to risk factors of hypertension, undiagnosed hypertension were also  
25 more prevalent among males and tobacco users [6,29]. The higher rate of undiagnosed  
26 hypertension among male might be due to their lack of awareness and lower treatment rate than  
27 female [32]. Smoking, a main source of using tobacco, is well recognized to have association with  
28 increased risk of hypertension in many settings including Nepal [33,34]. However, there is lack of  
29 evidence in determining the extent of how tobacco use is affecting patients to remain undiagnosed  
30 for hypertension. Our finding demonstrates that in Nepal, factors other than tobacco use played  
31 independent role in increasing rate of undiagnosed hypertension. Although difference in lifestyle  
32 practices between male and female in Nepal may not be the key factors behind such exposure,  
33 research need to be done to identify the actual risk factors [29].  
34  
35  
36  
37  
38  
39  
40  
41  
42  
43  
44  
45  
46  
47  
48  
49  
50  
51  
52  
53  
54  
55  
56  
57  
58  
59  
60

1  
2  
3 Undiagnosed hypertension may lead to adverse health consequences, including some organ  
4 damages [35]. The World Health Organization, mentioning hypertension as a silent killer, stated  
5 the prevalence of hypertension is higher in low- and middle-income countries than developed and  
6 high income countries [3]. Our results proves this claim and also aligns with findings from  
7 Bangladesh and Sub-Saharan Africa [19,36,37]. Although situated in closer geographic region, the  
8 prevalence of undiagnosed hypertension from this study differs from more developed and high  
9 income countries with up to date facility setup and health policies for their citizens. For example,  
10 the prevalence of undiagnosed hypertension was much lower in India and China than Nepal  
11 [38,39]. While half of the hypertensive patients remain undiagnosed in Nepal, the recent evidence  
12 shows that the prevalence of undiagnosed hypertension was 28.8% in China [40]. The reason  
13 behind this difference might be due to the differences in age of study participants. Nepal assessed  
14 participants of age 15 years or older while China included older participants (over 45 years) who  
15 assumed more aware, because of their ages, about health conditions and were more likely to visit  
16 doctors for regular health check-up. Similarly, findings from studies conducted in countries with  
17 more developed health facilities and advanced screening system such as Japan, Korea, England,  
18 Ireland, Egypt, Brazil and USA were also found to have lower level of undiagnosed hypertension  
19 than Nepal as found in this study [41–47]. Being a neighbouring country, the prevalence of  
20 undiagnosed hypertension of Nepal is relatively closer with that in Bangladesh [19].  
21  
22  
23  
24  
25  
26  
27  
28  
29  
30  
31  
32  
33  
34  
35  
36  
37  
38  
39  
40  
41  
42  
43  
44

45 In Nepal, despite the detection of risk factors [6,8,29] and inequalities [28], the prevalence of  
46 hypertension was well investigated nationally which lead policy makers to successfully steer away  
47 it's progression [48]. However, this effort will be meaningless unless all patients at risk of  
48 hypertension are accurately diagnosed and detected. It is necessary to identify whether unequal  
49 distribution of undiagnosed hypertension exists among patients with hypertension across different  
50  
51  
52  
53  
54  
55  
56  
57  
58  
59  
60



1  
2  
3 socioeconomic groups. It will aid in setting priorities and proper allocation of resources. Our study  
4 reveals existence of inequalities in the distribution of undiagnosed hypertension due to economic  
5 status, with poorest had higher prevalence of undiagnosed hypertension than richest and showed  
6 greater degree of wealth-based inequality concentrated among the poorest. These inequalities were  
7 more prevalent among patients living in different geographical locations including place of  
8 residence, ecological zones and administrative provinces. Such disparity may ascribe to greater  
9 awareness and more utilization of healthcare benefits by the people who are rich [28]. Such  
10 inequality might increase the catastrophic health spending given the rise of catastrophic household  
11 expenditure due to NCDs in Nepal [14,49]. Public health strategies might reduce this gap by  
12 concentrating more on implementing social health insurance policies which has to be equitable for  
13 all [41,49]. In this aspect, policy makers could take into consideration the disparities in the  
14 distribution of undiagnosed hypertension found in this study.

15  
16  
17  
18  
19  
20  
21  
22  
23  
24  
25  
26  
27  
28  
29  
30  
31 Several initiatives have been taken to control hypertension in Nepal. To address the burden of  
32 cardiovascular diseases (CVD), the WHO and partners launched an initiative called “Global  
33 Hearts” in 2016 [50]. This initiative took a comprehensive approach to help countries in scaling-  
34 up of affordable and adaptable measures to make their health services better able to detect and treat  
35 people at risk or suffering from CVD. This initiative comprises of three packages: SHAKE,  
36 HEARTS and MPOWER. The package “HEARTS” provides tools to incorporate CVD  
37 management best practices at the primary health care level to reduce CVD risk factors such as  
38 hypertension and high blood cholesterol. Like many LMICs, Nepal has been under this initiative  
39 to tackle the CVD. In addition, the Community-based Management of Hypertension in Nepal  
40 (COBIN) is a community-based cost-effective intervention that showed success in reducing  
41 hypertension in Nepal [51,52]. However, for designing further programs or interventions, our  
42  
43  
44  
45  
46  
47  
48  
49  
50  
51  
52  
53  
54  
55  
56  
57  
58  
59  
60

1  
2  
3 findings further provide insights in considering the hypertensive cases that remained undiagnosed  
4 and their uneven distributions across a spectrum of sociodemographic characteristics for the  
5 prevention of hypertension in Nepal.  
6  
7  
8  
9

10 Ignoring the population at risk of hypertention may become a major threat to health outcomes to  
11 any nation. This study bestows an immense opportunity to estimate the prevalence of undiagnosed  
12 hypertension which had not yet been studied nationally in Nepal. NDHS 2016 through  
13 incorporation of biomarker test bears evidence that a substantial proportion of individuals are  
14 suffering from blood pressure abnormalities. This in fact emphasise the need of conducting routine  
15 screening for hypertension widened with the greatest possible coverage in the population. A  
16 routine surveillance system with technology-based screening can aid in tracing disease incidence  
17 as well as people at risk of being undiagnosed [53]. Our study findings will be helpful to initiate  
18 policies and programs in capturing the highest domain of underprivileged population and bring  
19 them under routine surveillance at community level with optimum cost.  
20  
21  
22  
23  
24  
25  
26  
27  
28  
29  
30  
31  
32  
33

### 34 **Strengths and limitations**

35  
36  
37 We used most updated nationally representative cross-sectional data to determine the prevalence,  
38 correlates and inequalities of undiagnosed hypertension in Nepal. We considered complex survey  
39 design to capture variations due to designing. However, there may have residuals and unmeasured  
40 potential behavioral or lifestyle factors such as physical activity, dietary patterns and family history  
41 of hypertension that remain unmeasured in relating to undiagnosed hypertension due to lack of  
42 information. Since our data was corss-sectional, the relationship between undiagnosed  
43 hypertension and confounders were probabilistic rather than causal. However, identification of  
44 potential correlates through using odds ratio is widely acceptable. This study measured both  
45 absolute and relative inequalities in the prevalence of undiagnosed hypertension at national level  
46  
47  
48  
49  
50  
51  
52  
53  
54  
55  
56  
57  
58  
59  
60

1  
2  
3 as well as across place of residence, ecological zones and administrative provinces to further guide  
4  
5 policy/decision makers for better allocation of resources to reduce the burden.  
6  
7  
8  
9

## 10 11 **CONCLUSIONS**

12  
13  
14 This study manifests, in Nepal huge number of respondents with hypertension remained  
15  
16 undiagnosed. Initiative for NCDs diagnoses prioritizing those who are down and out requires to  
17  
18 be implemented. Community-based awareness should be raised to improve knowledge, attitude  
19  
20 and practice of the people particularly those who are young, slender, poor and male given their  
21  
22 higher risk of being undiagnosed. Routine screening and strengthening diagnosis of hypertension  
23  
24 in the primary level of health care service facilities may help Nepal in reducing cases with  
25  
26 undiagnosed hypertension. Moreover, identification of inequalities among different risk groups  
27  
28 will be beneficial in achieving universal health coverage of sustainable development goal (Goal  
29  
30 3.8.1). Social health insurance policies under integrated national NCD policy should be properly  
31  
32 enacted to ensure socioeconomically disadvantaged populations covered under the scheme for  
33  
34 prevention and control of hypertension from them.  
35  
36  
37  
38  
39  
40  
41  
42

## 43 **Acknowledgments**

44 We acknowledge the MEASURE DHS for providing access to NDHS 2016 datasets.  
45  
46  
47

## 48 **Contributors**

49  
50 MMH, SA and AAM conceptualized the study. MMH performed the data analysis and  
51  
52 interpretation of the findings. MMH, FT and MT contributed to writing. AAM and SA critically  
53  
54  
55  
56  
57

1  
2  
3 reviewed the analysis and final version of the manuscript. All authors made a through review of  
4  
5 the final draft and approved it for submission.  
6  
7  
8  
9

### 10 **Funding**

11 This research received no external funding.  
12  
13  
14  
15

### 16 **Competing interests**

17 None declared.  
18  
19  
20  
21

### 22 **Ethical approval**

23 The NDHS survey methodology and questionnaire was reviewed and approved by the ethical  
24 review board of Nepal Research Council and ICF Institutional. NDHS obtained informed consent  
25 from the respondents before conducting the survey. Therefore, separate ethical approval was not  
26 required for this study and we are using publicly available de-identified data.  
27  
28  
29  
30  
31  
32  
33

### 34 **Data sharing statement**

35 Data are available in a public, open access repository. All data related to study are included in the  
36 manuscript.  
37  
38  
39  
40  
41  
42

### 43 **REFEENCES**

- 44  
45 1 Forouzanfar MH, Afshin A, Alexander LT, *et al.* Global, regional, and national  
46 comparative risk assessment of 79 behavioural, environmental and occupational, and  
47 metabolic risks or clusters of risks, 1990–2015: a systematic analysis for the Global  
48 Burden of Disease Study 2015. *Lancet* 2016;**388**:1659–724. doi:10.1016/S0140-  
49 6736(16)31679-8  
50
- 51 2 Fisher N, Curfman G. Hypertension-A public health challenge of global proportions.  
52 *JAMA* 2018;**320**:1757–1759.  
53
- 54 3 Day WH. World Health Organisation. A global brief on Hypertension. Published Online  
55 First: 2013. doi:10.1136/bmj.1.4815.882-a  
56  
57

- 1  
2  
3 4 Region SA. *Noncommunicable Diseases in the South-East Asia Region*. 2011.
- 5 5 Mohan V, Seedat YK, Pradeepa R. The Rising Burden of Diabetes and Hypertension in  
6 Southeast Asian and African Regions: Need for Effective Strategies for Prevention and  
7 Control in Primary Health Care Settings. *Int J Hypertens* 2013;**2013**:1–14.  
8 doi:10.1155/2013/409083  
9
- 10 6 Agho KE, Osuagwu UL, Ezeh OK, *et al*. Gender differences in factors associated with  
11 prehypertension and hypertension in Nepal: A nationwide survey. *PLoS One* 2018;**13**:1–  
12 18. doi:10.1371/journal.pone.0203278  
13
- 14 7 Vaidya A, Pathak RP, Pandey MR. Prevalence of hypertension in Nepalese community  
15 triples in 25 years: A repeat cross-sectional study in rural Kathmandu. *Indian Heart J*  
16 2012;**64**:128–31. doi:10.1016/S0019-4832(12)60045-5  
17
- 18 8 Hasan M, Sutradhar I, Akter T, *et al*. Prevalence and determinants of hypertension among  
19 adult population in Nepal: Data from Nepal demographic and health survey 2016. *PLoS*  
20 *One* 2018;**13**:1–14. doi:10.1371/journal.pone.0198028  
21
- 22 9 Ghimire A, Shrestha NR, Thapa L, *et al*. Prevalence of Hypertension, Obesity, Diabetes,  
23 and Metabolic Syndrome in Nepal. *Int J Hypertens* 2011;**2011**:1–9.  
24 doi:10.4061/2011/821971  
25
- 26 10 Shrestha UK, Singh DL, Bhattarai MD. The prevalence of hypertension and diabetes  
27 defined by fasting and 2-h plasma glucose criteria in urban Nepal. *Diabet Med*  
28 2006;**23**:1130–5. doi:10.1111/j.1464-5491.2006.01953.x  
29
- 30 11 Mehta KD, Karki P, Lamsal M, Paudel IS, Majhi S, Das BK, Sharma S, Jha N BN.  
31 Hyperglycemia, glucose intolerance, hypertension and socioeconomic position in eastern  
32 Nepal. *Southeast Asian J Trop Med Public Heal* 2011;**42**:197–207.  
33  
34
- 35 12 McLachlan CS, Sharma R, Khanal V, *et al*. Prevalence of Hypertension in Member  
36 Countries of South Asian Association for Regional Cooperation (SAARC). *Medicine*  
37 *(Baltimore)* 2014;**93**:e74. doi:10.1097/md.0000000000000074  
38
- 39 13 Habits D. Non Communicable Diseases Risk Factors : STEPS Survey Nepal 2013. 2013.  
40
- 41 14 Dhital SM, Karki A. Dealing with the burden of hypertension in Nepal : current status ,  
42 challenges and health system issues. *Reg Heal Forum* 2013;**17**:44–52.  
43
- 44 15 MOHP New ERA and ICF DHS Program. Nepal Demographic and Health Survey 2016.  
45 2017;:636.  
46
- 47 16 Whelton PK, Carey RM, Aronow WS, *et al*. 2017  
48 *ACC/AHA/AAPA/ABC/ACPM/AGS/APhA/ASH/ASPC/NMA/PCNA guideline for the*  
49 *prevention, detection, evaluation, and management of high blood pressure in adults:*  
50 *Executive summary: A report of the American college of cardiology/American Heart*  
51 *Association task* . 2018. doi:10.1161/HYP.0000000000000066  
52
- 53 17 Chalmers J. 1999 World Health Organization-International Society of Hypertension  
54 guidelines for the management of hypertension. *Clin Exp Hypertens* 1999;**21**:1009–60.  
55 doi:10.3109/10641969909061028  
56  
57

- 1  
2  
3 18 Hou X. Urban – Rural Disparity of and Untreated Hypertension in China. *Asia Pac J Public Heal* 2008;**20**:159–69.
- 4  
5  
6 19 Ahmed S, Tariqujjaman M, Rahman MA, *et al.* Inequalities in the prevalence of  
7 undiagnosed hypertension among Bangladeshi adults: Evidence from a nationwide survey.  
8 *Int J Equity Health* 2019;**18**:1–12. doi:10.1186/s12939-019-0930-5
- 9  
10 20 World Health Organization. Nutrition Landacape Information System: Country Profile  
11 Indicators. 2010. doi:10.1159/000362780.Interpretation
- 12  
13 21 Wagstaff A. The bounds of the concentration index when the variable of interest is binary,  
14 with an application to immunization inequality. *Health Econ* 2005;**14**:429–32.  
15 doi:10.1002/hec.953
- 16  
17 22 Wagstaff A, Doorslaer E van, Paci P. On the measurement of horizontal inequity in the  
18 delivery of health care. *J Health Econ* 1991;**10**:169–205.
- 19  
20 23 Kakwani N, Wagstaff A, Doorslaer E van. Socioeconomic inequalities in health:  
21 measurement, computation and statistical inference. *J Econom* 1997;**77**:87–103.
- 22  
23 24 O’Donnell O, Doorslaer E Van. *Analyzing Health Equity Using Household Survey Data*,.  
24 *Washington*. 2008. doi:10.2471/BLT.08.052357
- 25  
26 25 Koolman X, Doorslaer E van. On the interpretation of a concentration index of inequality.  
27 *Health Econ* 2004;**13**:649–56.
- 28  
29 26 StataCorp. Stata Statistical Software: Release 13. 2013.
- 30  
31 27 Shrestha S, Shrestha A, Koju RP, *et al.* Barriers and facilitators to treatment among  
32 patients with newly diagnosed hypertension in Nepal. *Heart Asia* 2018;**10**:1–7.  
33 doi:10.1136/heartasia-2018-011047
- 34  
35 28 Mishra SR, Ghimire S, Shrestha N, *et al.* Socio-economic inequalities in hypertension  
36 burden and cascade of services: nationwide cross-sectional study in Nepal. *J Hum*  
37 *Hypertens* 2019;**33**:613–25. doi:10.1038/s41371-019-0165-3
- 38  
39 29 Chataut J, Adhikari R, Sinha N. The prevalence of and risk factors for hypertension in  
40 adults living in central development region of Nepal. *Kathmandu Univ Med J* 2011;**9**:13–  
41 8.
- 42  
43 30 Kim Y, Kong KA. Do hypertensive individuals who are aware of their disease follow  
44 Lifestyle recommendations better than those who are not aware? *PLoS One* 2015;**10**:1–13.  
45 doi:10.1371/journal.pone.0136858
- 46  
47 31 Karmacharya BM, Koju RP, LoGerfo JP, *et al.* Awareness, treatment and control of  
48 hypertension in Nepal: Findings from the Dhulikhel Heart Study. *Heart Asia* 2017;**9**:1–8.  
49 doi:10.1136/heartasia-2016-010766
- 50  
51 32 Mehata S, Shrestha N, Mehta R, *et al.* Prevalence, awareness, treatment and control of  
52 hypertension in Nepal: Data from nationally representative population-based cross-  
53 sectional study. *J Hypertens* 2018;**36**:1680–8. doi:10.1097/HJH.0000000000001745
- 54  
55 33 Singh R, Fedacko J, Pella D, *et al.* Prevalence and risk factors for prehypertension and  
56  
57  
58  
59  
60

- hypertension in five Indian cities. *Acta Cardiol* 2011;**66**.
- 34 Dhungana RR, Pandey AR, Bista B, *et al*. Prevalence and Associated Factors of Hypertension: A Community-Based Cross-Sectional Study in Municipalities of Kathmandu, Nepal. *Int J Hypertens* 2016;**2016**. doi:10.1155/2016/1656938
- 35 Schmierer RE. Hypertoniebedingte endorganschäden. *Dtsch Arztebl* 2010;**107**:866–73. doi:10.3238/arztebl.2010.0866
- 36 Islam FM a, Bhuiyan a, Chakrabarti R, *et al*. Undiagnosed hypertension in a rural district in Bangladesh: The Bangladesh Population-based Diabetes and Eye Study (BPDES). *J Hum Hypertens* 2016;**30**:252–9. doi:10.1038/jhh.2015.65
- 37 Ataklte F, Erqou S, Kaptoge S, *et al*. Burden of undiagnosed hypertension in sub-saharan africa: A systematic review and meta-analysis. *Hypertension* 2015;**65**:291–8. doi:10.1161/HYPERTENSIONAHA.114.04394
- 38 Joshi SR, Saboo B, Vadivale M, *et al*. Prevalence of diagnosed and undiagnosed diabetes and hypertension in India-results from the screening India's twin epidemic (SITE) study. *Diabetes Technol Ther* 2012;**14**:8–15. doi:10.1089/dia.2011.0243
- 39 Li X, Xu J, Yao H, *et al*. Obesity and overweight prevalence and its association with undiagnosed hypertension in Shanghai population, China: A cross-sectional population-based survey. *Front Med China* 2012;**6**:322–8. doi:10.1007/s11684-012-0204-8
- 40 Zhou J, Fang S. Association between undiagnosed hypertension and health factors among middle-aged and elderly chinese population. *Int J Environ Res Public Health* 2019;**16**. doi:10.3390/ijerph16071214
- 41 Zallman L, Himmelstein D, Woolhandler S, *et al*. Undiagnosed and Uncontrolled Hypertension and Hyperlipidemia among Immigrants in the US. *J Immigr Minor Heal* 2013;**15**:858–65. doi:10.1007/s10903-012-9695-2.Undiagnosed
- 42 Choo EH, Ihm SH, Lim S, *et al*. A simple screening score for undiagnosed hypertension. *Int J Cardiol* 2014;**172**:e465–7. doi:10.1016/j.ijcard.2014.01.040
- 43 Abd Elaziz KM, Dewedar SA, Sabbour S, *et al*. Screening for hypertension among adults: Community outreach in Cairo, Egypt. *J Public Heal (United Kingdom)* 2015;**37**:701–6. doi:10.1093/pubmed/fdu085
- 44 Chor D, Pinho Ribeiro AL, Sá Carvalho M, *et al*. Prevalence, awareness, treatment and influence of socioeconomic variables on control of high blood pressure: Results of the ELSA-Brasil study. *PLoS One* 2015;**10**:1–14. doi:10.1371/journal.pone.0127382
- 45 Mosca I, Kenny RA. Exploring differences in prevalence of diagnosed, measured and undiagnosed hypertension: the case of Ireland and the United States of America. *Int J Public Health* 2014;**59**:759–67. doi:10.1007/s00038-014-0573-7
- 46 Saito Y, Davarian S, Takahashi A, *et al*. Diagnosis and Control of Hypertension in the Elderly Populations of Japan and the United States. *Int J Popul Stud* 2015;**1**:19–28. doi:10.1016/j.physbeh.2017.03.040

- 1  
2  
3 47 Marshall A, Nazroo J, Feeney K, *et al.* Comparison of hypertension healthcare outcomes  
4 among older people in the USA and England. *J Epidemiol Community Health*  
5 2016;**70**:264–70. doi:10.1136/jech-2014-205336  
6  
7 48 World Health Organization. Multisectoral Action Plan on the Prevention and Control of  
8 NCD (2014–2020). 2014. [https://extranet.who.int/nutrition/gina/sites/default/files/NPL](https://extranet.who.int/nutrition/gina/sites/default/files/NPL_2014_NCD_Multisectoral_Action_Plan.pdf)  
9 2014 NCD Multisectoral Action Plan.pdf  
10  
11 49 E. S, S. G, M.M. R, *et al.* Catastrophic household expenditure on health in Nepal: A cross-  
12 sectional survey. *Bull World Health Organ* 2014;**92**:760–7.  
13 doi:<http://dx.doi.org/10.2471/BLT.13.126615>  
14  
15 50 World Health Organization. Cardiovascular disease.  
16 [https://www.who.int/cardiovascular\\_diseases/global-hearts/Global\\_hearts\\_initiative/en/](https://www.who.int/cardiovascular_diseases/global-hearts/Global_hearts_initiative/en/)  
17  
18 51 Neupane D, McLachlan CS, Christensen B, *et al.* Community-based intervention for  
19 blood pressure reduction in Nepal (COBIN trial): Study protocol for a cluster-randomized  
20 controlled trial. *Trials* 2016;**17**:1–7. doi:10.1186/s13063-016-1412-3  
21  
22 52 Krishnan A, Finkelstein EA, Kallestrup P, *et al.* Cost-effectiveness and budget impact of  
23 the community-based management of hypertension in Nepal study (COBIN): a  
24 retrospective analysis. *Lancet Glob Heal* 2019;**7**:e1367–74. doi:10.1016/S2214-  
25 109X(19)30338-9  
26  
27 53 Rakotz MK, Ewigman BG, Sarav M, *et al.* A technology-based quality innovation to  
28 identify undiagnosed hypertension among active primary care patients. *Ann Fam Med*  
29 2014;**12**:352–8. doi:10.1370/afm.1665  
30  
31  
32  
33

34 **Table 1:** Characteristics of the study participants  
35

| Variables      | Total       |      |           | Diagnosed hypertension |      |           | Undiagnosed hypertension |      |           | Chi-Square Statistic (p-value) |
|----------------|-------------|------|-----------|------------------------|------|-----------|--------------------------|------|-----------|--------------------------------|
|                | n           | %    | 95% CI    | n                      | %    | 95% CI    | n                        | %    | 95% CI    |                                |
| <b>Overall</b> | <b>3334</b> | --   | --        | 1634                   | 49.6 | 47.1-52.1 | 1700                     | 50.4 | 47.9-52.9 | --                             |
| <b>Age</b>     |             |      |           |                        |      |           |                          |      |           | 29.6317                        |
| 15-24          | 237         | 6.6  | 5.6-7.8   | 107                    | 43.1 | 36.1-50.4 | 130                      | 56.9 | 49.6-63.9 | 0.0008                         |
| 25-34          | 449         | 13.2 | 11.9-14.5 | 196                    | 43.8 | 38.4-49.3 | 253                      | 56.2 | 50.7-61.6 |                                |
| 35-44          | 637         | 19.6 | 18-21.3   | 287                    | 45.2 | 40.1-50.3 | 350                      | 54.8 | 49.7-59.9 |                                |
| 45-54          | 687         | 20.9 | 19.2-22.8 | 333                    | 49.4 | 45-53.8   | 354                      | 50.6 | 46.2-55   |                                |
| 55-64          | 643         | 18.9 | 17.4-20.5 | 344                    | 54.7 | 49.8-59.5 | 299                      | 45.3 | 40.5-50.2 |                                |
| >=65           | 681         | 20.8 | 19-22.7   | 367                    | 55.1 | 50.3-59.8 | 314                      | 44.9 | 40.2-49.7 |                                |
| <b>Sex</b>     |             |      |           |                        |      |           |                          |      |           | 18.35                          |
| Male           | 1640        | 49.5 | 47.7-51.3 | 746                    | 45.8 | 42.6-49.1 | 894                      | 54.2 | 50.9-57.4 | 0.0003                         |
| Female         | 1694        | 50.5 | 48.7-52.3 | 888                    | 53.3 | 50.1-56.4 | 806                      | 46.7 | 43.6-49.9 |                                |
| <b>BMI</b>     |             |      |           |                        |      |           |                          |      |           | 29.2511                        |
| Normal         | 1816        | 53.6 | 51.2-56.1 | 841                    | 47.1 | 44.3-50   | 975                      | 52.9 | 50-55.7   | 0.0001                         |



|    |                             |      |      |           |      |      |           |      |      |           |         |
|----|-----------------------------|------|------|-----------|------|------|-----------|------|------|-----------|---------|
| 1  |                             |      |      |           |      |      |           |      |      |           |         |
| 2  |                             |      |      |           |      |      |           |      |      |           |         |
| 3  |                             |      |      |           |      |      |           |      |      |           |         |
| 4  | Thin                        | 361  | 11.1 | 9.9-12.5  | 156  | 42.2 | 35.7-49   | 205  | 57.8 | 51-64.3   |         |
| 5  | Overweight/obese            | 1120 | 35.2 | 32.5-38   | 620  | 55.6 | 51.7-59.5 | 500  | 44.4 | 40.5-48.3 |         |
| 6  | <b>Education</b>            |      |      |           |      |      |           |      |      |           | 6.5852  |
| 7  | No education                | 1576 | 46.5 | 44.1-48.9 | 778  | 50.9 | 47.5-54.4 | 798  | 49.1 | 45.6-52.5 | 0.2125  |
| 8  | Primary                     | 602  | 17.8 | 16.2-19.5 | 285  | 46.1 | 41.1-51.1 | 317  | 53.9 | 48.9-58.9 |         |
| 9  | Secondary                   | 804  | 24.1 | 22.5-25.9 | 383  | 48   | 43.6-52.4 | 421  | 52   | 47.6-56.4 |         |
| 10 | Higher                      | 350  | 11.5 | 9.9-13.5  | 187  | 53   | 46.9-58.9 | 163  | 47   | 41.1-53.1 |         |
| 11 |                             |      |      |           |      |      |           |      |      |           |         |
| 12 | <b>Wealth Quintile</b>      |      |      |           |      |      |           |      |      |           | 90.7085 |
| 13 | Poorest                     | 610  | 15.5 | 13.3-18   | 211  | 35.9 | 31.9-40   | 399  | 64.1 | 60-68.1   | 0.0000  |
| 14 | Poorer                      | 689  | 19.2 | 16.9-21.7 | 313  | 44.2 | 39.8-48.7 | 376  | 55.8 | 51.3-60.2 |         |
| 15 | Middle                      | 604  | 17.3 | 15.2-19.6 | 301  | 49.5 | 44.5-54.5 | 303  | 50.5 | 45.5-55.5 |         |
| 16 | Richer                      | 667  | 19.7 | 17.1-22.6 | 344  | 50.2 | 44.9-55.5 | 323  | 49.8 | 44.5-55.1 |         |
| 17 | Richest                     | 764  | 28.3 | 24-33     | 465  | 60.4 | 55.4-65.2 | 299  | 39.6 | 34.8-44.6 |         |
| 18 |                             |      |      |           |      |      |           |      |      |           |         |
| 19 | <b>Place of residence</b>   |      |      |           |      |      |           |      |      |           | 16.691  |
| 20 | Urban                       | 2221 | 64.9 | 59.9-69.6 | 1152 | 52.2 | 49-55.4   | 1069 | 47.8 | 44.6-51   | 0.0057  |
| 21 | Rural                       | 1113 | 35.1 | 30.4-40.1 | 482  | 44.8 | 40.7-48.9 | 631  | 55.2 | 51.1-59.3 |         |
| 22 |                             |      |      |           |      |      |           |      |      |           |         |
| 23 | <b>Ecological zone</b>      |      |      |           |      |      |           |      |      |           | 3.43    |
| 24 | Mountain                    | 200  | 5.6  | 3.6-8.6   | 92   | 47.1 | 39.4-54.8 | 108  | 52.9 | 45.2-60.6 | 0.3721  |
| 25 | Hill                        | 1694 | 49.9 | 44.2-55.6 | 788  | 48.3 | 45.1-51.5 | 906  | 51.7 | 48.5-54.9 |         |
| 26 | Terai                       | 1440 | 44.5 | 39.2-49.9 | 754  | 51.4 | 47.1-55.6 | 686  | 48.6 | 44.4-52.9 |         |
| 27 |                             |      |      |           |      |      |           |      |      |           |         |
| 28 | <b>Province</b>             |      |      |           |      |      |           |      |      |           | 23.7869 |
| 29 | Province 1                  | 490  | 17   | 15.2-19   | 265  | 53   | 47.7-58.3 | 225  | 47   | 41.7-52.3 | 0.0511  |
| 30 | Province 2                  | 460  | 16.2 | 14.2-18.3 | 243  | 53.1 | 46.5-59.6 | 217  | 46.9 | 40.4-53.5 |         |
| 31 | Province 3                  | 575  | 26   | 21.8-30.6 | 303  | 52.7 | 46.8-58.5 | 272  | 47.3 | 41.5-53.2 |         |
| 32 | Province 4                  | 578  | 13.2 | 11.5-15.1 | 273  | 46.9 | 42-51.7   | 305  | 53.1 | 48.3-58   |         |
| 33 | Province 5                  | 553  | 17.8 | 15.4-20.4 | 253  | 45.4 | 39-51.9   | 300  | 54.6 | 48.1-61   |         |
| 34 | Province 6                  | 343  | 3.9  | 3.3-4.6   | 148  | 39.8 | 32.9-47.1 | 195  | 60.2 | 52.9-67.1 |         |
| 35 | Province 7                  | 335  | 6    | 5-7.2     | 149  | 41.9 | 33.8-50.5 | 186  | 58.1 | 49.5-66.2 |         |
| 36 |                             |      |      |           |      |      |           |      |      |           |         |
| 37 | <b>Caffeine consumption</b> |      |      |           |      |      |           |      |      |           | 0.2587  |
| 38 | No                          | 2942 | 88.4 | 86.7-89.9 | 1434 | 49.4 | 46.9-52.0 | 1508 | 50.6 | 48.0-53.1 | 0.6895  |
| 39 | Yes                         | 392  | 11.6 | 10.1-13.3 | 200  | 50.8 | 44.1-57.4 | 192  | 49.2 | 42.6-55.8 |         |
| 40 |                             |      |      |           |      |      |           |      |      |           |         |
| 41 | <b>Tobacco use</b>          |      |      |           |      |      |           |      |      |           | 5.3524  |
| 42 | No                          | 2826 | 84.9 | 83.2-86.6 | 1410 | 50.4 | 47.8-53.1 | 1416 | 49.6 | 46.9-52.2 | 0.0338  |
| 43 | Yes                         | 508  | 15.1 | 13.5-16.8 | 224  | 44.8 | 40.0-49.8 | 284  | 55.1 | 50.2-60.0 |         |
| 44 |                             |      |      |           |      |      |           |      |      |           |         |
| 45 | <b>Alcohol consumption</b>  |      |      |           |      |      |           |      |      |           | 2.4122  |
| 46 | No                          | 3249 | 97.8 | 97.1-98.4 | 1600 | 49.8 | 47.2-52.8 | 1649 | 50.2 | 47.6-52.8 | 0.1505  |
| 47 | Yes                         | 85   | 2.2  | 1.6-2.9   | 34   | 40.6 | 29.4-52.9 | 51   | 59.4 | 47.1-70.6 |         |

Note: n = Number of sample, CI = Confidence interval

1  
2  
3 **Figure 1:** Selection of participants  
4

5 **Figure 2:** Determinants of undiagnosed hypertension among patients with hypertension in  
6 Nepal, 2016  
7

8 **Figure 3:** Concentration curve to measure the wealth-based inequality in the prevalence of  
9 undiagnosed hypertension among patients with hypertension in Nepal, 2016  
10

11 **Figure 4:** Socioeconomic inequalities in the prevalence of undiagnosed hypertension among  
12 patients with hypertension across geographical locations in Nepal, 2016  
13  
14  
15  
16  
17  
18  
19  
20  
21  
22  
23  
24  
25  
26  
27  
28  
29  
30  
31  
32  
33  
34  
35  
36  
37  
38  
39  
40  
41  
42  
43  
44  
45  
46  
47  
48  
49  
50  
51  
52  
53  
54  
55  
56  
57  
58  
59  
60

For peer review only

**Figure 1:** Selection of participants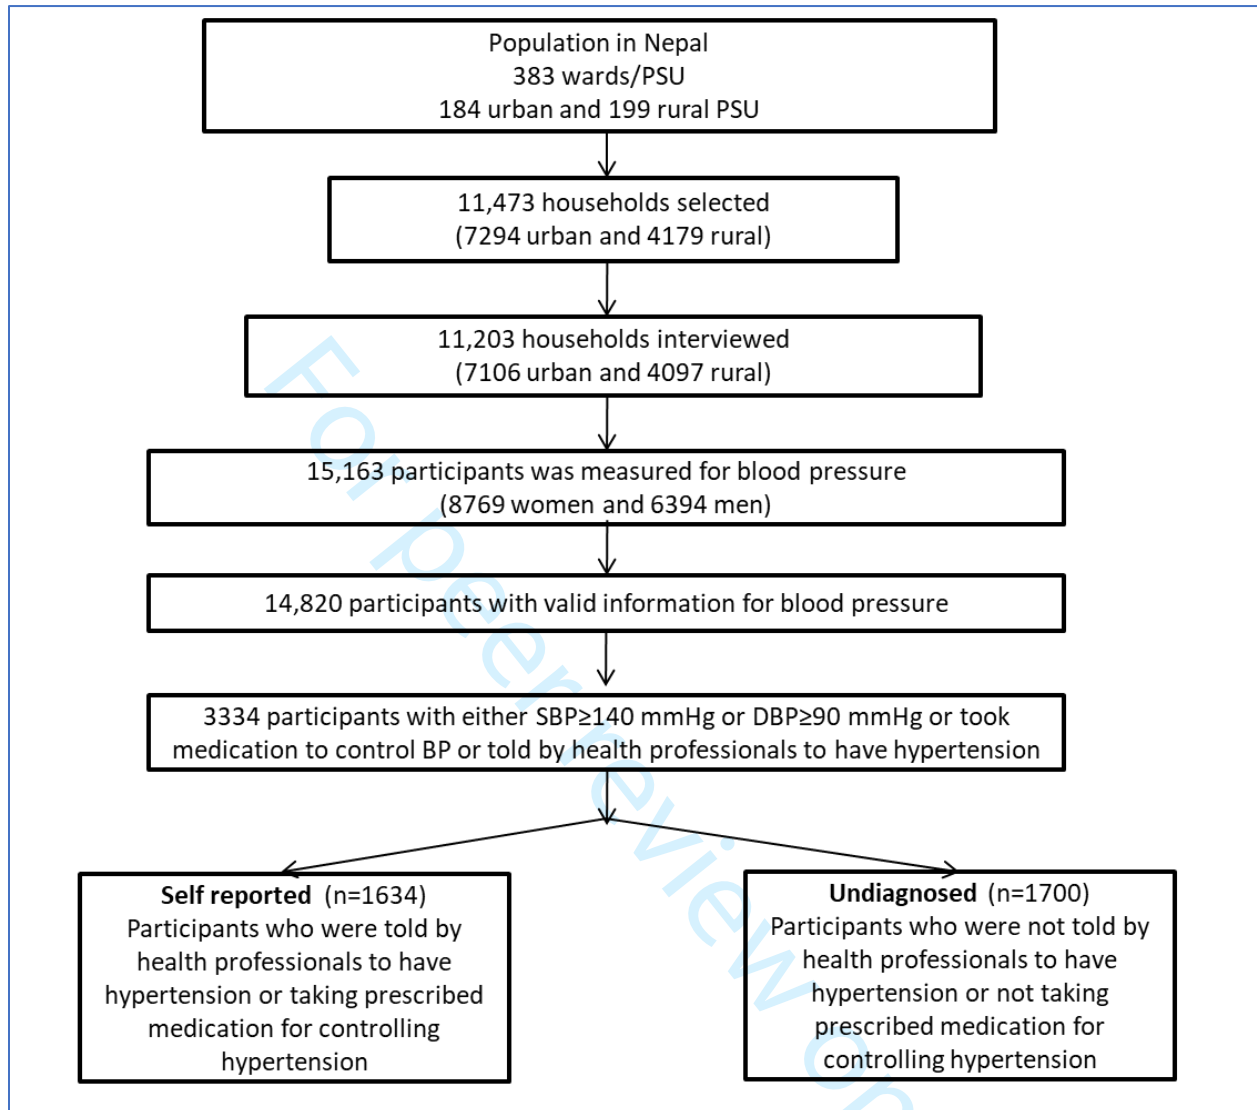

**Figure 2:** Determinants of undiagnosed hypertension among patients with hypertension in Nepal, 2016

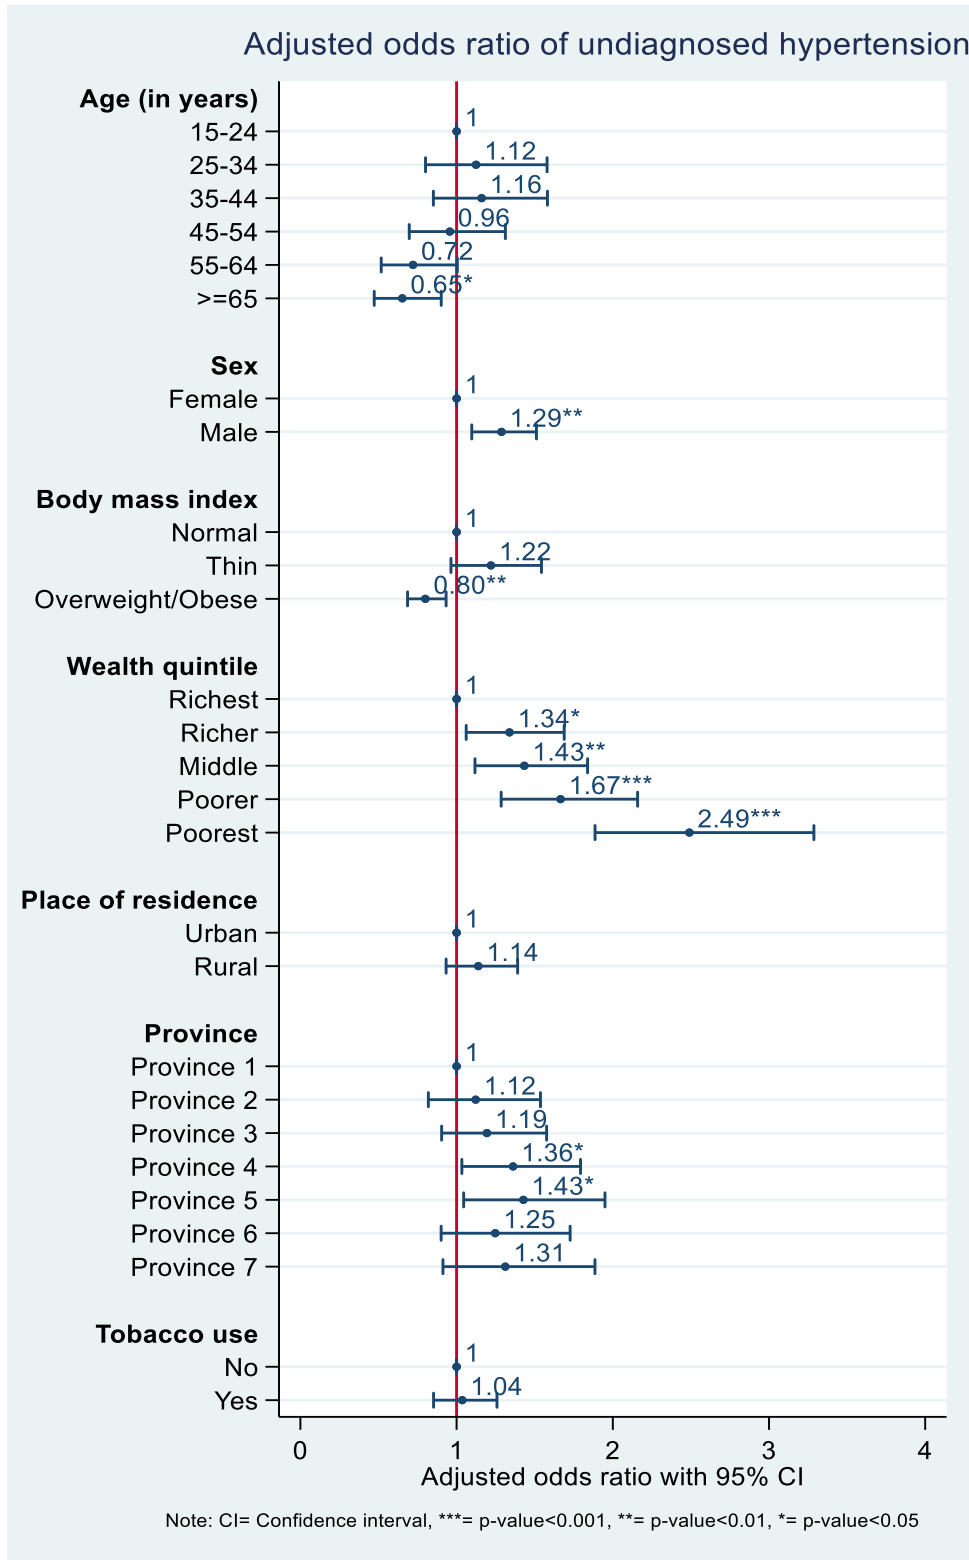

**Figure 3:** Concentration curve to measure the wealth-based inequality in the prevalence of undiagnosed hypertension among patients with hypertension in Nepal, 2016

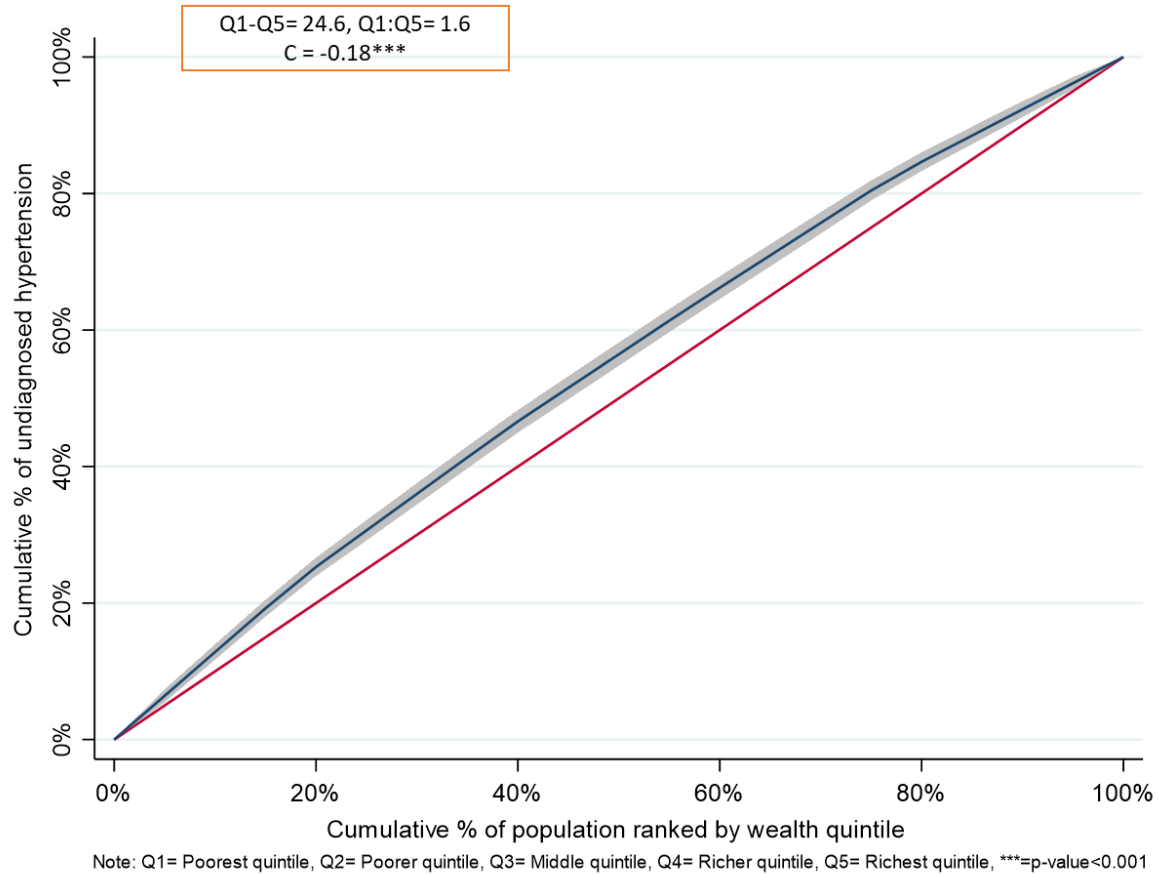

**Figure 4:** Socioeconomic inequalities in the prevalence of undiagnosed hypertension among patients with hypertension across geographical locations in Nepal, 2016

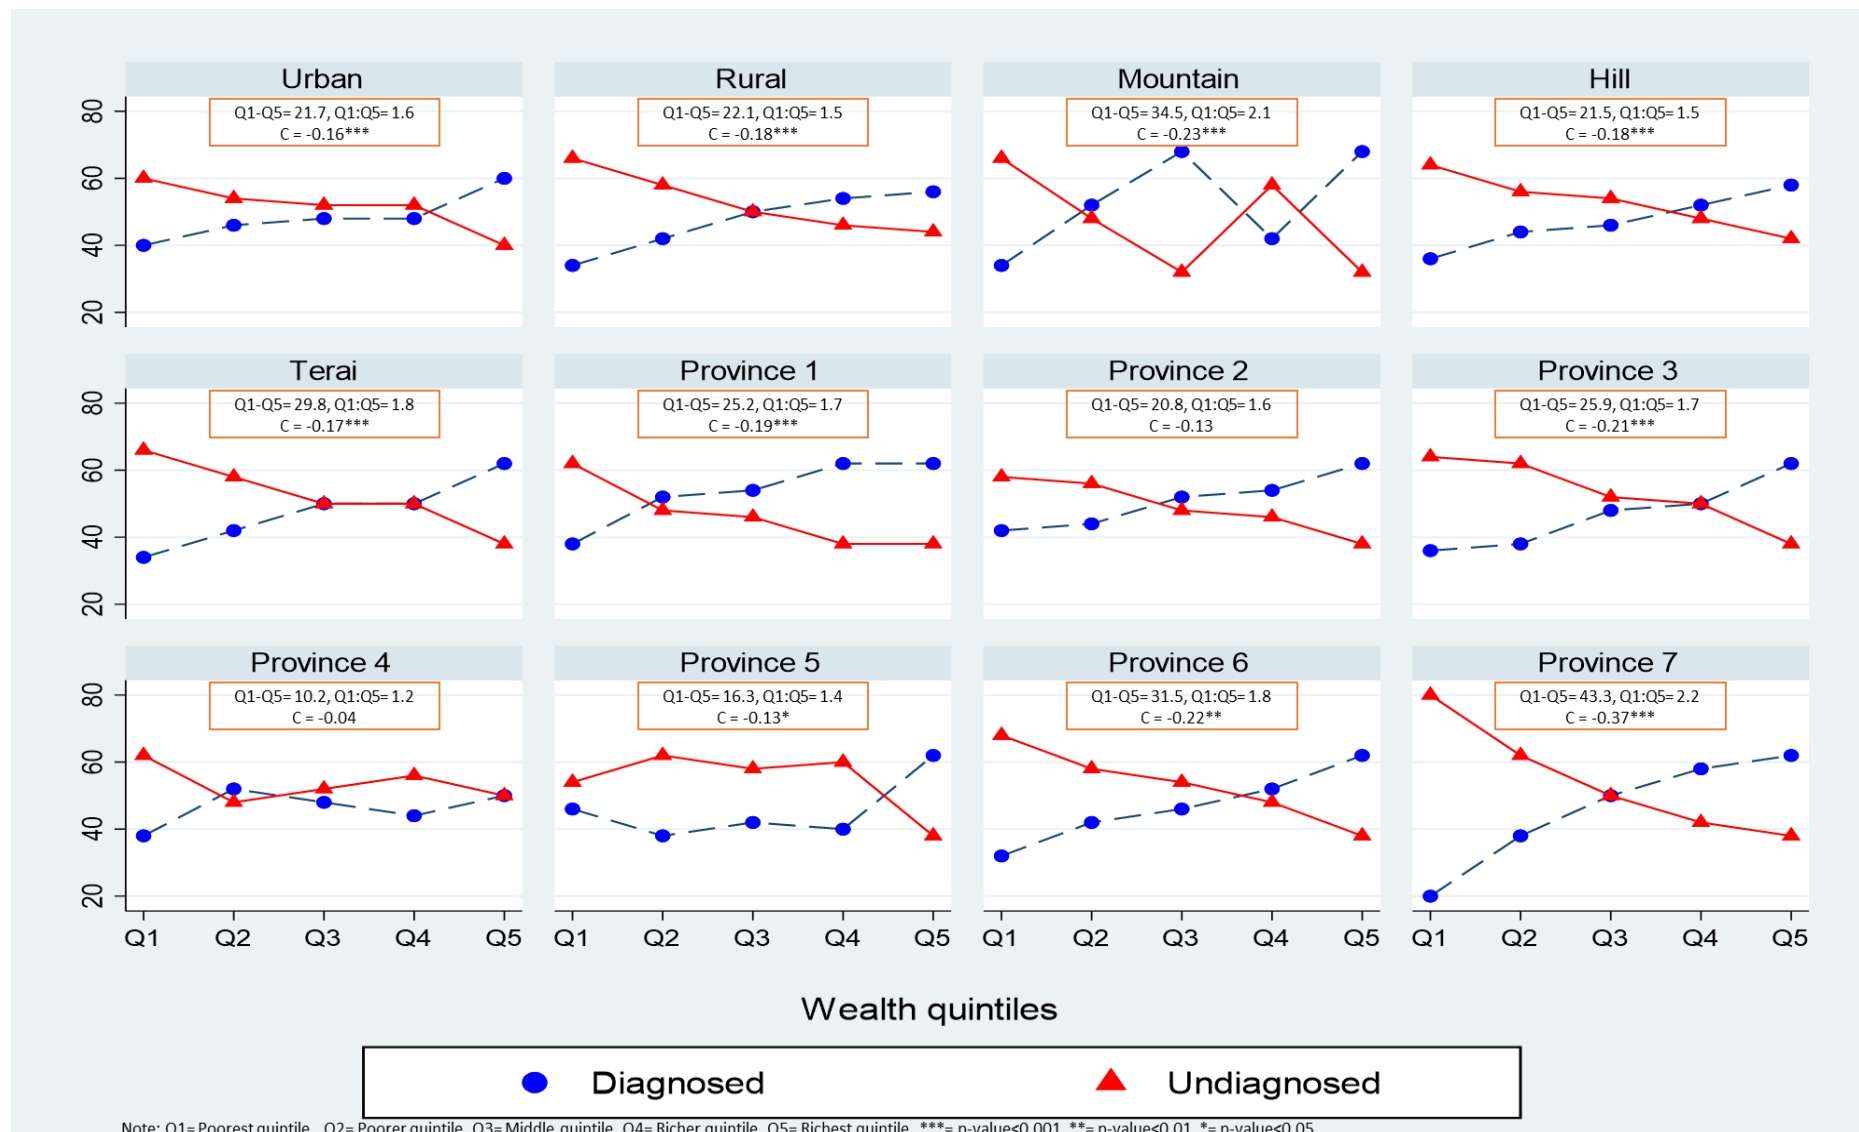

Note: Q1=Poorest quintile, Q2= Poorer quintile, Q3= Middle quintile, Q4= Richer quintile, Q5= Richest quintile, \*\*\*= p-value<0.001, \*\*= p-value<0.01, \*= p-value<0.05

**Supplementary Table 1:** Unadjusted determinants of undiagnosed hypertension among patients with hypertension in Nepal, 2016

| Variables                 | COR  | 95% CI    | p-value |
|---------------------------|------|-----------|---------|
| <b>Age</b>                |      |           |         |
| 15-24                     | 1    |           |         |
| 25-34                     | 1.06 | 0.77-1.46 | 0.7090  |
| 35-44                     | 1.00 | 0.75-1.34 | 0.9800  |
| 45-54                     | 0.87 | 0.65-1.18 | 0.3760  |
| 55-64                     | 0.72 | 0.52-0.98 | 0.0400  |
| >=65                      | 0.70 | 0.52-0.96 | 0.0250  |
| <b>Sex</b>                |      |           |         |
| Male                      | 1.32 | 1.14-1.53 | 0.0000  |
| Female                    | 1    |           |         |
| <b>BMI</b>                |      |           |         |
| Normal                    | 1    |           |         |
| Thin                      | 1.13 | 0.91-1.41 | 0.2610  |
| Overweight/obese          | 0.70 | 0.6-0.8   | 0.0000  |
| <b>Education</b>          |      |           |         |
| No education              | 1    |           |         |
| Primary                   | 1.08 | 0.9-1.31  | 0.4010  |
| Secondary                 | 1.07 | 0.88-1.3  | 0.4790  |
| Higher                    | 0.85 | 0.66-1.09 | 0.2070  |
| <b>Wealth Quintile</b>    |      |           |         |
| Poorest                   | 2.94 | 2.29-3.77 | 0.0000  |
| Poorer                    | 1.87 | 1.47-2.38 | 0.0000  |
| Middle                    | 1.57 | 1.23-1.99 | 0.0000  |
| Richer                    | 1.46 | 1.16-1.84 | 0.0010  |
| Richest                   | 1    |           |         |
| <b>Place of residence</b> |      |           |         |
| Urban                     | 1    |           |         |
| Rural                     | 1.41 | 1.17-1.71 | 0.0000  |
| <b>Ecological zone</b>    |      |           |         |
| Mountain                  | 1    |           |         |
| Hill                      | 0.98 | 0.68-1.41 | 0.9100  |
| Terai                     | 0.78 | 0.53-1.12 | 0.1800  |
| <b>Province</b>           |      |           |         |
| Province 1                | 1    |           |         |
| Province 2                | 1.05 | 0.77-1.44 | 0.7540  |
| Province 3                | 1.06 | 0.78-1.44 | 0.7220  |
| Province 4                | 1.32 | 1-1.74    | 0.0530  |
| Province 5                | 1.40 | 1.01-1.92 | 0.0400  |
| Province 6                | 1.55 | 1.09-2.2  | 0.0140  |

|                             |      |           |        |
|-----------------------------|------|-----------|--------|
| Province 7                  | 1.47 | 0.99-2.18 | 0.0550 |
| <b>Caffeine consumption</b> |      |           |        |
| No                          | 1.00 |           |        |
| Yes                         | 0.91 | 0.72-1.15 | 0.4400 |
| <b>Tobacco consumption</b>  |      |           |        |
| No                          | 1.00 |           |        |
| Yes                         | 1.26 | 1.06-1.51 | 0.0100 |
| <b>Alcohol consumption</b>  |      |           |        |
| No                          | 1.00 |           |        |
| Yes                         | 1.46 | 0.91-2.32 | 0.1140 |

Note: COR= Crude Odds Ratio, CI= Confidence Interval



1  
2  
3  
4  
5  
6  
7  
8  
9  
10  
11  
12  
13  
14  
15  
16  
17  
18  
19  
20  
21  
22  
23  
24  
25  
26  
27  
28  
29  
30  
31  
32  
33  
34  
35  
36  
37  
38  
39  
40  
41  
42  
43  
44  
45  
46  
47  
48  
49  
50  
51  
52  
53  
54  
55  
56  
57  
58  
59  
60STROBE Statement—Checklist of items that should be included in reports of *cross-sectional studies*

|                              | Page No | Item No | Recommendation                                                                                                                                                                                               |
|------------------------------|---------|---------|--------------------------------------------------------------------------------------------------------------------------------------------------------------------------------------------------------------|
| <b>Title and abstract</b>    | 1       | 1       | (a) Indicate the study's design with a commonly used term in the title or the abstract                                                                                                                       |
|                              | 2-3     |         | (b) Provide in the abstract an informative and balanced summary of what was done and what was found                                                                                                          |
| <b>Introduction</b>          |         |         |                                                                                                                                                                                                              |
| Background/rationale         | 4-5     | 2       | Explain the scientific background and rationale for the investigation being reported                                                                                                                         |
| Objectives                   | 5       | 3       | State specific objectives, including any prespecified hypotheses                                                                                                                                             |
| <b>Methods</b>               |         |         |                                                                                                                                                                                                              |
| Study design                 | 5       | 4       | Present key elements of study design early in the paper                                                                                                                                                      |
| Setting                      | 5       | 5       | Describe the setting, locations, and relevant dates, including periods of recruitment, exposure, follow-up, and data collection                                                                              |
| Participants                 | 6       | 6       | (a) Give the eligibility criteria, and the sources and methods of selection of participants                                                                                                                  |
| Variables                    | 7-8     | 7       | Clearly define all outcomes, exposures, predictors, potential confounders, and effect modifiers. Give diagnostic criteria, if applicable                                                                     |
| Data sources/<br>measurement | 5       | 8*      | For each variable of interest, give sources of data and details of methods of assessment (measurement). Describe comparability of assessment methods if there is more than one group                         |
| Bias                         | 10      | 9       | Describe any efforts to address potential sources of bias                                                                                                                                                    |
| Study size                   | 6       | 10      | Explain how the study size was arrived at                                                                                                                                                                    |
| Quantitative variables       | 7-8     | 11      | Explain how quantitative variables were handled in the analyses. If applicable, describe which groupings were chosen and why                                                                                 |
| Statistical methods          | 8-9     | 12      | (a) Describe all statistical methods, including those used to control for confounding                                                                                                                        |
|                              | "n/a"   |         | (b) Describe any methods used to examine subgroups and interactions                                                                                                                                          |
|                              | "n/a"   |         | (c) Explain how missing data were addressed                                                                                                                                                                  |
|                              | "n/a"   |         | (d) If applicable, describe analytical methods taking account of sampling strategy                                                                                                                           |
|                              | "n/a"   |         | (e) Describe any sensitivity analyses                                                                                                                                                                        |
| <b>Results</b>               |         |         |                                                                                                                                                                                                              |
| Participants                 | 10      | 13*     | (a) Report numbers of individuals at each stage of study—eg numbers potentially eligible, examined for eligibility, confirmed eligible, included in the study, completing follow-up, and analysed            |
|                              | "n/a"   |         | (b) Give reasons for non-participation at each stage                                                                                                                                                         |
|                              | "n/a"   |         | (c) Consider use of a flow diagram                                                                                                                                                                           |
| Descriptive data             | 10      | 14*     | (a) Give characteristics of study participants (eg demographic, clinical, social) and information on exposures and potential confounders                                                                     |
|                              | "n/a"   |         | (b) Indicate number of participants with missing data for each variable of interest                                                                                                                          |
| Outcome data                 | 11      | 15*     | Report numbers of outcome events or summary measures                                                                                                                                                         |
| Main results                 | 11-13   | 16      | (a) Give unadjusted estimates and, if applicable, confounder-adjusted estimates and their precision (eg, 95% confidence interval). Make clear which confounders were adjusted for and why they were included |

|                          |       |    |                                                                                                                                                                            |
|--------------------------|-------|----|----------------------------------------------------------------------------------------------------------------------------------------------------------------------------|
|                          |       |    | (b) Report category boundaries when continuous variables were categorized                                                                                                  |
|                          |       |    | (c) If relevant, consider translating estimates of relative risk into absolute risk for a meaningful time period                                                           |
| Other analyses           | “n/a” | 17 | Report other analyses done—eg analyses of subgroups and interactions, and sensitivity analyses                                                                             |
| <b>Discussion</b>        |       |    |                                                                                                                                                                            |
| Key results              | 13-14 | 18 | Summarise key results with reference to study objectives                                                                                                                   |
| Limitations              | 17-18 | 19 | Discuss limitations of the study, taking into account sources of potential bias or imprecision. Discuss both direction and magnitude of any potential bias                 |
| Interpretation           | 14-17 | 20 | Give a cautious overall interpretation of results considering objectives, limitations, multiplicity of analyses, results from similar studies, and other relevant evidence |
| Generalisability         | 18    | 21 | Discuss the generalisability (external validity) of the study results                                                                                                      |
| <b>Other information</b> |       |    |                                                                                                                                                                            |
| Funding                  | 19    | 22 | Give the source of funding and the role of the funders for the present study and, if applicable, for the original study on which the present article is based              |

\*Give information separately for exposed and unexposed groups.

**Note:** An Explanation and Elaboration article discusses each checklist item and gives methodological background and published examples of transparent reporting. The STROBE checklist is best used in conjunction with this article (freely available on the Web sites of PLoS Medicine at <http://www.plosmedicine.org/>, Annals of Internal Medicine at <http://www.annals.org/>, and Epidemiology at <http://www.epidem.com/>). Information on the STROBE Initiative is available at [www.strobe-statement.org](http://www.strobe-statement.org).

# BMJ Open

## Examining the prevalence, correlates and inequalities of undiagnosed hypertension in Nepal: a population-based cross-sectional study

|                                 |                                                                                                                                                                                                                                                                                                                                                                                                                                                                                                                                                                                                                                                                                                                                                                                                                                                             |
|---------------------------------|-------------------------------------------------------------------------------------------------------------------------------------------------------------------------------------------------------------------------------------------------------------------------------------------------------------------------------------------------------------------------------------------------------------------------------------------------------------------------------------------------------------------------------------------------------------------------------------------------------------------------------------------------------------------------------------------------------------------------------------------------------------------------------------------------------------------------------------------------------------|
| Journal:                        | <i>BMJ Open</i>                                                                                                                                                                                                                                                                                                                                                                                                                                                                                                                                                                                                                                                                                                                                                                                                                                             |
| Manuscript ID                   | bmjopen-2020-037592.R2                                                                                                                                                                                                                                                                                                                                                                                                                                                                                                                                                                                                                                                                                                                                                                                                                                      |
| Article Type:                   | Original research                                                                                                                                                                                                                                                                                                                                                                                                                                                                                                                                                                                                                                                                                                                                                                                                                                           |
| Date Submitted by the Author:   | 15-Jun-2020                                                                                                                                                                                                                                                                                                                                                                                                                                                                                                                                                                                                                                                                                                                                                                                                                                                 |
| Complete List of Authors:       | Hasan, Md. Mehedi ; The University of Queensland Institute for Social Science Research,<br>Tasnim, Fariha; International Centre for Diarrhoeal Disease Research Bangladesh, Maternal and Child Health Division<br>Tariqujjaman, Md.; International Centre for Diarrhoeal Disease Research Bangladesh, Nutrition and Clinical Services Division<br>Ahmed, Sayem; Liverpool School of Tropical Medicine, Department of Tropical Biology; International Centre for Diarrhoeal Disease Research Bangladesh, Health Systems and Population Studies Division<br>Cleary, Anne; The University of Queensland, Institute for Social Science Research<br>Mamun, Abdullah; University of Queensland, Institute for Social Science Research; University of Queensland, ARC Centre of Excellence for Children and Families over the Life Course (The Life Course Centre) |
| <b>Primary Subject Heading</b>: | Epidemiology                                                                                                                                                                                                                                                                                                                                                                                                                                                                                                                                                                                                                                                                                                                                                                                                                                                |
| Secondary Subject Heading:      | Public health                                                                                                                                                                                                                                                                                                                                                                                                                                                                                                                                                                                                                                                                                                                                                                                                                                               |
| Keywords:                       | Hypertension < CARDIOLOGY, Public health < INFECTIOUS DISEASES, EPIDEMIOLOGY                                                                                                                                                                                                                                                                                                                                                                                                                                                                                                                                                                                                                                                                                                                                                                                |
|                                 |                                                                                                                                                                                                                                                                                                                                                                                                                                                                                                                                                                                                                                                                                                                                                                                                                                                             |

SCHOLARONE™  
Manuscripts



I, the Submitting Author has the right to grant and does grant on behalf of all authors of the Work (as defined in the below author licence), an exclusive licence and/or a non-exclusive licence for contributions from authors who are: i) UK Crown employees; ii) where BMJ has agreed a CC-BY licence shall apply, and/or iii) in accordance with the terms applicable for US Federal Government officers or employees acting as part of their official duties; on a worldwide, perpetual, irrevocable, royalty-free basis to BMJ Publishing Group Ltd ("BMJ") its licensees and where the relevant Journal is co-owned by BMJ to the co-owners of the Journal, to publish the Work in this journal and any other BMJ products and to exploit all rights, as set out in our [licence](#).

The Submitting Author accepts and understands that any supply made under these terms is made by BMJ to the Submitting Author unless you are acting as an employee on behalf of your employer or a postgraduate student of an affiliated institution which is paying any applicable article publishing charge ("APC") for Open Access articles. Where the Submitting Author wishes to make the Work available on an Open Access basis (and intends to pay the relevant APC), the terms of reuse of such Open Access shall be governed by a Creative Commons licence – details of these licences and which [Creative Commons](#) licence will apply to this Work are set out in our licence referred to above.

Other than as permitted in any relevant BMJ Author's Self Archiving Policies, I confirm this Work has not been accepted for publication elsewhere, is not being considered for publication elsewhere and does not duplicate material already published. I confirm all authors consent to publication of this Work and authorise the granting of this licence.

**Title:** Examining the prevalence, correlates and inequalities of undiagnosed hypertension in Nepal: a population-based cross-sectional study

**Authors:** Md. Mehedi Hasan<sup>1,2\*</sup>, Fariha Tasnim<sup>3</sup>, Md. Tariqujjaman<sup>4</sup>, Sayem Ahmed<sup>5-7</sup>, Anne Cleary<sup>1</sup> and Abdullah A Mamun<sup>1,2</sup>

### Author affiliations

<sup>1</sup> Institute for Social Science Research, The University of Queensland, Indooroopilly, Queensland 4068, Australia

<sup>2</sup> ARC Centre of Excellence for Children and Families over the Life Course (The Life Course Centre), The University of Queensland, Indooroopilly, Queensland 4068, Australia

<sup>3</sup> Maternal and Child Health Division, International Centre for Diarrhoeal Disease Research, Bangladesh (icddr,b), Dhaka, Bangladesh

<sup>4</sup> Nutrition and Clinical Services Division, International Centre for Diarrhoeal Disease Research, Bangladesh (icddr,b), Dhaka, Bangladesh

<sup>5</sup> Department of Tropical Biology, Liverpool School of Tropical Medicine, Liverpool, United Kingdom

<sup>6</sup> Health Systems and Population Studies Division, International Centre for Diarrhoeal Disease Research, Bangladesh (icddr,b), Dhaka, Bangladesh

<sup>7</sup> Health Economics and Policy Research Group, Department of Learning, Informatics, Management and Ethics, Karolinska Institutet, Stockholm, Sweden

\* Correspondence:

Md. Mehedi Hasan

Institute for Social Science Research

ARC Centre of Excellence for Children and Families over the Life Course

The University of Queensland

80 Meiers Road, Long Pocket Precinct, Indooroopilly, Queensland 4068, Australia

Phone: +61 470 237 155

Fax: + 61 7 334 67646

E-mail: [m.m.hasan@uqconnect.edu.au](mailto:m.m.hasan@uqconnect.edu.au)

## ABSTRACT

**Objective:** To examine the prevalence, correlates and socio-demographic inequalities of undiagnosed hypertension in Nepal.

**Design:** This study used cross-sectional 2016 Nepal Demographic and Health Survey (NDHS) data. Undiagnosed hypertensive patients were defined as a NDHS respondent who was diagnosed as hypertensive (systolic blood pressure  $\geq 140$  mmHg or diastolic blood pressure  $\geq 90$  mmHg) during the survey, but never took any prescribed anti-hypertensive medicine to lower/control blood pressure and was never identified as having hypertension by a health professional prior the survey. Multiple binary logistic regression analysis was performed, and Concentration Index was measured.

**Setting:** Nepal

**Participants:** Adult patients with hypertension

**Results:** Among 3334 hypertensive patients, 50.4% remained undiagnosed during the survey in Nepal. Adjusted model reveals that patients who were male, belonged to households other than the highest wealth quintile, and lived in Province 4 and Province 5 were at higher risk of remaining undiagnosed for hypertension. Patients who were 65+ years of age and were overweight/obese were at lower risk of remaining undiagnosed for hypertension. The poor-rich gap was 24.6 percentage points (Q1= 64.1% vs Q5= 39.6%) and poor:rich ratio was 1.6 (Q1/Q5= 1.6) in the prevalence of undiagnosed hypertension. Undiagnosed hypertension was disproportionately higher among lower socioeconomic status groups (Concentration Index, C= -0.18). Inequalities in the prevalence of undiagnosed hypertension further varied across other geographic locations including place of residence, ecological zones and administrative provinces.

1  
2  
3 **Conclusions:** Undiagnosed hypertension was highly prevalent in Nepal and there were substantial  
4 inequalities by socio-demographics and sub-national levels. Increasing awareness, strengthening  
5 routine screening to diagnose hypertension at primary health service facilities and enactment of  
6 social health insurance policy may help Nepal to prevent and control this burden.  
7  
8  
9  
10  
11  
12

13 **Keywords:** Undiagnosed hypertension, Inequality, Demographic and Health Survey, Nepal  
14  
15  
16  
17

#### 18 **Strengths and limitations of this study**

- 19 • This study determined the prevalence and correlates of undiagnosed hypertension in  
20 Nepal using the most updated, population-based, nationally representative data.  
21  
22
- 23 • This study measured both wealth-based absolute and relative inequalities in the  
24 prevalence of undiagnosed hypertension at national level as well as across place of  
25 residence, ecological zones and administrative provinces.  
26  
27
- 28 • The cross-sectional nature of the data limits us to measure causal association between  
29 undiagnosed hypertension and the explanatory variables studied.  
30  
31
- 32 • The association of some potential behavioral or lifestyle factors such as physical  
33 activity, dietary patterns and family history with undiagnosed hypertension remain  
34 unmeasured due to lack of available data.  
35  
36  
37  
38  
39  
40  
41  
42  
43  
44  
45  
46  
47  
48  
49  
50  
51  
52  
53  
54  
55  
56  
57  
58  
59  
60

## INTRODUCTION

Hypertension, or raised blood pressure, is a leading cause of global mortality and disability [1], affecting over one billion people annually [2]. Hypertension is a directing factor for cardiovascular diseases (CVDs), in particular heart diseases, myocardial infarctions, kidney failure, strokes, disability and premature deaths [2,3]. In South-East Asian countries, hypertension affects approximately one in three adults, accounting for nearly 1.5 million deaths annually and contributing to 9.4% of total deaths [4]. In South-East Asian countries, more than 50% of people with hypertension remain undiagnosed [5]. Nepal has one of the highest prevalence rates of hypertension among South-East Asian countries [6].

Currently, Nepal is facing an epidemiological transition with increasing prevalence of hypertension [7]. A study based on the Nepal Demographic and Health Survey 2016 reported about 20% of Nepalese adults (aged  $\geq 18$  years) had hypertension [8]. However, other studies have reported that the prevalence of hypertension ranges from 23% to 34% in Nepal [7,9–12], although not all of these studies are representative of the present day Nepalese population. In 2013, the national NCD risk factor survey showed that while 25.7% of adults aged 15-69 years had hypertension in Nepal, a further 42.7% of adults had never measured their blood pressure [13]. Correct diagnoses of hypertension is prerequisite to the prevention, control and proper treatment of this disease. In addition, failure to diagnose and treat hypertension early may lead to serious health hazards, disability in later life, or eventually death. In Nepal, a number of government, non-government and private health facilities are providing health services such as diagnosis, medication and treatment for hypertension. However, owing to challenges with workforce capacity, resourcing of health-care facilities, and out-of-pocket costs incurred by patients, the



1  
2  
3 current health care system in Nepal is not adequately prepared to support the diagnosis, treatment  
4 and control of hypertension [14].  
5  
6

7  
8 To prevent hypertension, the disease first needs to be diagnosed before any related complications  
9 arise. However, there is a lack of evidence about the prevalence of undiagnosed hypertension in  
10 Nepal at national and subnational levels. Information on the estimates of undiagnosed  
11 hypertension, and its related socio-demographic inequalities, at national and subnational level may  
12 assist policy makers in formulating effective strategies for screening, treatment and control as well  
13 as prevention of hypertension and associated burdens of disease, particularly among vulnerable  
14 groups. As such, we aimed to examine the prevalence, correlates and socio-demographic  
15 inequalities of undiagnosed hypertension in Nepal.  
16  
17  
18  
19  
20  
21  
22  
23  
24  
25

## 26 27 28 29 30 **METHODS**

### 31 32 33 **Data source**

34  
35  
36 We used the most updated nationally representative cross-sectional data from Nepal Demographic  
37 and Health Survey (NDHS). While the data of Demographic and Health Surveys is managed by  
38 Measure Evaluation, the NDHS was conducted from June 2016 to January 2017 by a private  
39 research organization named “NEW ERA” under the monitoring and supervision of the Ministry  
40 of Health, Nepal. To estimate the prevalence of hypertension nationally in Nepal, the NDHS 2016  
41 obtained informed consent from the household head on behalf of all household members of each  
42 surveyed household [15]. For academic and scientific purposes, this anonymous dataset without  
43 any identifiers was made available by the ICF International, Maryland, United States [15]. We  
44 obtained approval to access and use these data to conduct this study.  
45  
46  
47  
48  
49  
50  
51  
52  
53  
54  
55  
56  
57  
58  
59  
60

## Survey procedure and participants

In 2015, Nepal reformed and restructured municipality boundaries resulting in seven administrative provinces comprising several districts and urban-rural areas with smaller administrative units known as wards [8]. With comparatively greater household numbers, urban areas were further divided into enumeration areas (EA). The primary sampling unit (PSU) were wards, for both urban and rural areas [15]. Because of some changes in administrative areas, Nepal revised the sampling frame of National Population and Housing Census (NPHC). The 2016 NDHS used this revised sampling frame and applied a multistage survey which was conducted in two and three stages across rural and urban areas respectively. NDHS selected the PSUs proportionately to the size in the first stage and then the random selection of EAs from the systematic selection of households from each PSU in the second stage. In the third stage, the households were selected by using a stratified cluster sampling technique in urban areas. A detailed description of the methodology is available elsewhere [15]. A total of 11490 households were selected from 383 wards, of which 5520 households from 184 wards were from urban settings and 5970 households from 199 wards were from rural settings. From these households, all the residents aged 15 years or above were eligible for blood pressure measurement. With an overall response rate of 95%, a total of 14823 individuals participated in the survey. This study uses an analytical sample of adults (> 15 years) with hypertension (n = 3334). Figure 1 illustrates the procedure for selecting the study sample.

{Figure 1 will be added here}

## Outcome variable

To measure hypertension, the 2016 NDHS used the UA-767F/FAC (A&D Medical) automated device to record the blood pressure of the participants. With 5 minutes intervals between each measurement, the 2016 NDHS recorded the measurements of blood pressure three times in a sitting position. NDHS considered the last two measures of blood pressure levels and used their mean to detect hypertension. The survey used the World Health Organization (WHO) guidelines to report a participant as hypertensive [15]. The WHO guideline has integrated the 2017 guidelines of the American College of Cardiology/ American Society of Hypertension [16,17]. According to the WHO guideline, a participant with systolic blood pressure (SBP)  $\geq 140$  mmHg or diastolic blood pressure (DBP)  $\geq 90$  mmHg is diagnosed as a hypertension case. We also considered participants as hypertension patients if s/he was previously told by a health professional that they have hypertension or if they were already taking medication to control hypertension. Our outcome variable is undiagnosed hypertension. A patient is considered as undiagnosed for hypertension if, at the time of the survey, s/he was diagnosed as hypertensive (SBP $\geq 140$  mmHg or DBP $\geq 90$  mmHg) but never took any prescribed anti-hypertensive medicine to lower/control blood pressure and was never told by a health professional that they have hypertension prior the survey [18,19].

### **Explanatory variables**

This study considered a set of socio-demographic and behavioral characteristics as independent variables. Age (in years), sex, Body Mass Index (BMI) measured through dividing the weight by squared height ( $\text{kg}/\text{m}^2$ ), education level, household wealth status, place of residence, ecological zone, and provinces were considered as socio-demographic characteristics of the respondents. Age was categorized as 15-24, 25-34, 35-44, 45-54, 55-64 and  $\geq 65$  years. Sex had two categories, male and female. The BMI was categorized as thin/underweight (BMI $< 18.5$   $\text{kg}/\text{m}^2$ ), normal (18.5  $\text{kg}/\text{m}^2$   $\leq$  BMI $< 25$   $\text{kg}/\text{m}^2$ ) and overweight/obese (BMI $\geq 25.0$   $\text{kg}/\text{m}^2$ ) [20]. Based on the highest class

1  
2  
3 completed by the respondents, level of education was classified as no education, primary,  
4 secondary and higher. NDHS used principal component analysis [15] to construct the wealth index  
5 and order households into five socioeconomic quintiles (poorest, poorer, middle, richer and  
6 richest). The place of residence was stratified as urban and rural across all geographic locations.  
7  
8 Nepal was ecologically divided in Mountain, Hill and Terai. The seven administrative provinces  
9  
10 were identified as Province 1, Province 2, Province 3, Province 4, Province 5, Province 6 and  
11 Province 7. Three behavioral characteristics of respondents, caffeine, tobacco and alcohol  
12 consumption, were considered as independent variables each of which contained dichotomous  
13 response of whether or not the respondent consumed caffeine, tobacco or alcohol.  
14  
15  
16  
17  
18  
19  
20  
21  
22  
23

### 24 **Statistical analyses**

25  
26  
27 Using univariate analysis we described the prevalence of undiagnosed hypertension and  
28 background characteristics of the study patients. The estimates of each of the categorical variables  
29 included in this study were reported with numbers, weighted percentages and 95% confidence  
30 intervals (CIs) of estimates. The weighted prevalence of undiagnosed hypertension was  
31 determined across the background characteristics of the study patients from bivariate analysis.  
32  
33 Statistical significance was detected by applying Chi-square test. Then, we conducted simple and  
34 multiple binary logistic regression analyses to examine the correlates of undiagnosed hypertension.  
35  
36 The results of the regression analysis were presented in terms of odds ratio with respective 95%  
37 CIs. Variables that were statistically significant in simple logistic regression analysis were entered  
38 in the multiple regression model to estimate the adjusted odds ratio (AOR). Notably, the statistical  
39 significance was defined at 5% level ( $p$ -value < 0.05). Variance inflation factors to detect  
40 multicollinearity among the independent variables were assessed before incorporating them into  
41 the multiple regression model. Due to hierarchical structure of NDHS data, we considered the  
42  
43  
44  
45  
46  
47  
48  
49  
50  
51  
52  
53  
54  
55  
56  
57  
58  
59  
60

1  
2  
3 cluster sampling design of the 2016 NDHS to estimate the prevalence and determinants in this  
4 study [15]. We excluded cases with missing values for blood pressure measurements.  
5  
6  
7

8 Proposed by Wagstaff [21] to measure the inequality, we estimated the concentration index (C),  
9  
10 to show the degree and direction of wealth-based inequality in undiagnosed hypertension  
11 prevalence. For the purpose of calculating C, the households were ranked from the poorest to the  
12 richest according to their socioeconomic characteristics. We plotted a concentration curve to  
13 portray the distribution of undiagnosed hypertension. The Y-axis of the concentration curve  
14 representing the cumulative proportion of undiagnosed hypertension and the X-axis represents the  
15 cumulative proportions of the population across wealth quintiles. When the concentration curve  
16 coincides with the diagonal, the prevalence of undiagnosed hypertension is treated as equally  
17 distributed across socioeconomic groups. In contrast, the concentration curve typically deviates  
18 from the diagonal if there exists inequalities in the prevalence of undiagnosed hypertension. The  
19 C is defined as twice the area between the concentration curve and the diagonal [22–24]. The index  
20 value can range between  $-1$  and  $+1$ , a positive value implies the prevalence of undiagnosed  
21 hypertension is more concentrated among higher socioeconomic status groups and a negative value  
22 implies the prevalence is more concentrated among lower socioeconomic status groups [23,25].  
23  
24 We repeated the estimation of C across other geographical locations such as place of residence,  
25 ecological zones and provinces to detect the group of patients with highest severity of  
26 socioeconomic inequalities in the prevalence of undiagnosed hypertension. STATA (version 13)  
27 was used to perform all the analyses [26].  
28  
29  
30  
31  
32  
33  
34  
35  
36  
37  
38  
39  
40  
41  
42  
43  
44  
45  
46  
47  
48  
49  
50  
51  
52  
53  
54  
55  
56  
57  
58  
59  
60

## Patient and public involvement

Patients and public were not involved in developing the research questions, measuring outcome and designing the study. Information of the participants was anonymous.

## RESULTS

### General Characteristics of the Study Participants

**Table 1** shows the general characteristics of the study participants. Among the patients studied, the average age of patients was 49.8 years (95% CI 49.1, 50.5) with the lowest percentage of patients in the 15-24 years age group (6.6%) and highest percentage of patients in the 45-54 years age group (20.9%). The sample was balanced among male (49.5%) and female (50.5%) participant. Nearly half of the patients were normal in terms of their BMI while more than one third of the patients were overweight/obese. Two-thirds of the patients resided in urban area (64.9%). The educational status of the patients were poor with nearly half of the patients having no education while 24.1% and 11.5% had secondary and higher education respectively. The highest number of patients belonged to richest wealth quintile (28.3%) and the lowest number of patients belonged to the poorest wealth quintile (15.5%). Also, the highest number of patients were from province 3 (26.0%) followed by province 5 (17.8%) and province 1 (17.0%). Only 5.6% of patients were from the mountain ecological zone.

**{Table 1 will be added here}**

## Prevalence of Undiagnosed Hypertension

Of the 3334 participants who had hypertension during the survey, more than half of them were detected as remaining undiagnosed (50.4%). The prevalence of undiagnosed hypertension among the patients varied across their age ( $p$ -value < 0.001), sex ( $p$ -value < 0.001), BMI ( $p$ -value < 0.001), wealth quintile ( $p$ -value < 0.001) and place of residence ( $p$ -value < 0.01). The prevalence of undiagnosed hypertension was higher among younger patients (15-24 years age group) and steadily decreased with the increase of age. The prevalence of undiagnosed hypertension was higher among male patients (54.2%) compared to female patients (46.7%). Compared to patients with normal BMI, the prevalence of undiagnosed hypertension was higher among patients with lower BMI (57.8%) and lower among overweight/obese patients (44.4%). Compared to patients of the richest wealth quintile (39.6%), the prevalence of undiagnosed hypertension was higher among patients of the poorest (64.1%) and poorer (55.8%) quintiles. The rate of undiagnosed hypertension was higher among rural patients (55.2%) compared to urban (47.8%). No educational, ecological and provincial variations in the prevalence of undiagnosed hypertension was observed (**Table 1**).

## Correlates of Undiagnosed Hypertension

We found that age, sex, BMI, wealth quintile, place of residence and province were significantly associated with the prevalence of undiagnosed hypertension among hypertensive patients in unadjusted logistic regression analysis (see **supplementary table 1**).

**Figure 2** represents the results of multiple logistic regression analysis. The multiple binary logistic regression model showed that age, sex, BMI, wealth quintile and province had significant

1  
2  
3 association with undiagnosed hypertension. Elderly patients ( $\geq 65$  years of age) had a lower  
4 likelihood of being undiagnosed for hypertension than patients aged 15-24 years (AOR = 0.65,  
5 95% CI 0.48, 0.91). Male patients were 1.29 times more likely than female patients to remain  
6 undiagnosed for hypertension (AOR = 1.29, 95% CI 1.11, 1.51). Compared to patients with normal  
7 BMI, overweight/obese patients (AOR = 0.80, 95% CI 0.69, 0.93) were less likely to have  
8 undiagnosed hypertension.  
9

10  
11 We found wealth quintiles as potential correlates of undiagnosed hypertension. The risk of  
12 remaining undiagnosed for hypertension increased with decreasing socioeconomic status.  
13 Likelihood of having undiagnosed hypertension was greater among poorer socioeconomic status  
14 patients compared to higher socioeconomic quintiles. Patients of poorest and poorer wealth  
15 quintiles were 2.49 (AOR = 2.49; 95% CI 1.90, 3.30) and 1.67 (AOR = 1.67; 95% CI 1.29, 2.16)  
16 times more likely to have an undiagnosed hypertension condition than patients of the wealthiest  
17 quintile.  
18

19  
20 Moreover, significant provincial variation was evident in the prevalence of undiagnosed  
21 hypertension among hypertensive patients. Patients of province 4 (AOR = 1.36, 95% CI 1.04, 1.79)  
22 and province 5 (AOR = 1.43, 95% CI 1.05, 1.95) were more likely to have undiagnosed  
23 hypertension than patients of province 1.  
24

25  
26  
27  
28  
29  
30  
31  
32  
33  
34  
35  
36  
37  
38  
39  
40  
41  
42  
43  
44 {Figure 2 will be added here}

### 45 46 47 **Socioeconomic Inequalities in Undiagnosed Hypertension**

48  
49  
50 **Figure 3** depicts the inequalities in the prevalence of undiagnosed hypertension among  
51 hypertensive patients. The difference in the distribution of undiagnosed hypertension was 24.6%  
52 between the lowest wealth quintile (Q1) and highest wealth quintile (Q5), meaning that the  
53  
54  
55  
56  
57



1  
2  
3 prevalence of undiagnosed hypertension was greater by 24.6 percentage points among the poorest  
4 patients. The relative measure of inequality in terms of poor (Q1): rich (Q5) ratio was 1.6 for the  
5 prevalence of undiagnosed hypertension among patients, depicting that the prevalence of  
6 undiagnosed hypertension was 1.6 times higher among the poorest than the richest patients. We  
7 found negative value of the Concentration Index ( $C = -0.18$ ) which suggests that the prevalence of  
8 undiagnosed hypertension among hypertensive patients was disproportionately distributed among  
9 lower socioeconomic status groups.  
10  
11  
12  
13  
14  
15  
16  
17  
18  
19

20 **{Figure 3 will be added here}**  
21  
22

23 In addition, patients living in mountain areas and in province 7 had large gaps in the prevalence of  
24 undiagnosed hypertension (**Figure 4**). The higher Q1:Q5 ratio were observed among those who  
25 had large Q1-Q5 gaps in the prevalence of undiagnosed hypertension across different geographic  
26 locations. We found large negative values of  $C$  among those who had higher Q1-Q5 gaps and  
27 Q1:Q5 ratio for the prevalence of undiagnosed hypertension. See **Figure 4** for details.  
28  
29  
30  
31  
32  
33  
34

35 **{Figure 4 will be added here}**  
36  
37  
38  
39  
40

## 41 **DISCUSSION**

42  
43

44 Globally, to date few studies have been conducted on undiagnosed hypertension. For the first time,  
45 this study estimated the prevalence of undiagnosed hypertension in Nepal as 50.4% of respondents  
46 who tested positive for hypertension in the 2016 NDHS. In addition, this study identified the risk  
47 factors and inequalities associated with undiagnosed hypertension in Nepal. The high prevalence  
48 of undiagnosed hypertension identified in this study may be due to people's lack of awareness and  
49 willingness to partake in regular health check-ups in the absence of health issues, coupled with  
50  
51  
52  
53  
54  
55  
56  
57

1  
2  
3 accessibility barriers to screening services [27]. Lack of knowledge, attitudes and behaviours that  
4 promote healthy lifestyles as preventive measures to non-communicable diseases (NCDs) may  
5 also act as a driver of undiagnosed hypertension [27–29]. Community-based awareness raising of  
6 changing lifestyles to address the burden of NCDs might be effective in reducing this gap [30].  
7  
8  
9

10  
11  
12  
13 Several studies have reported higher risks of hypertension among people who are older in age,  
14 male, urban dwellers, have higher education level, regularly consume tobacco and/or alcohol, or  
15 are overweight [6,8,28,29]. We found that patients aged 65+ years and who were overweight/obese  
16 were at lower risk of remaining undiagnosed from hypertension. Our findings depicted a greater  
17 proportion of undiagnosed hypertensive patients among those who were young and those with  
18 lower BMI. Young or underweight people may be less conscious about their health status as they  
19 might have the misconception that they are less likely to suffer from NCDs [31]. In addition, people  
20 from lower socioeconomic status groups in Nepal tend to have less knowledge and awareness  
21 about health hazards, typically have poorer access to services for screening diseases and lack the  
22 capacity to afford treatment costs for diseases [28]. This may contribute to the disproportionate  
23 occurrence of undiagnosed hypertension among lower socioeconomic status groups in Nepal.  
24  
25  
26  
27  
28  
29  
30  
31  
32  
33  
34  
35  
36  
37  
38

39 Similar to risk factors of hypertension, undiagnosed hypertension was also more prevalent among  
40 males and tobacco users [6,29]. The higher rate of undiagnosed hypertension among males might  
41 be due to their lack of awareness and lower treatment rates than females [32]. Smoking, a main  
42 source of using tobacco, is well recognized to be associated with increased risk of hypertension in  
43 many settings, including Nepal [33,34]. However, there is lack of evidence to determine the extent  
44 to which tobacco use is related to patients remaining undiagnosed for hypertension. Our findings  
45 demonstrate that, in Nepal, factors other than tobacco use played independent roles in predicting  
46 the rate of undiagnosed hypertension. While differences in lifestyle practices between males and  
47  
48  
49  
50  
51  
52  
53  
54  
55  
56  
57  
58  
59  
60

1  
2  
3 females in Nepal may be a key factor behind different exposures, further research is needed to  
4 identify the actual risk factors [29].  
5  
6  
7

8 Undiagnosed hypertension may lead to adverse health consequences, including organ damage [35].  
9

10 The WHO, denoting hypertension as a silent killer, stated that the prevalence of hypertension is  
11 higher in low- and middle-income countries compared to developed and high income countries  
12 [3]. Our results support this claim and also align with findings from Bangladesh and Sub-Saharan  
13 Africa [19,36,37]. Despite being neighbouring countries, the prevalence of undiagnosed  
14 hypertension from this study (approximately 50%) is much higher than that of China[38]. For  
15 example, recent evidence shows that the prevalence of undiagnosed hypertension in China is  
16 28.8% [39]. The reason behind this difference might be due to the differences in age of study  
17 participants. Our study assessed participants of age 15 years or older in Nepal, while the Chinese  
18 study included older participants (over 45 years) who may be more aware of health conditions and  
19 more likely to visit doctors for regular health check-ups. Findings from studies conducted in  
20 countries with more developed health care systems and advanced screening processes such as  
21 Japan, Korea, England, Ireland, Egypt, Brazil and USA were also found to have lower levels of  
22 undiagnosed hypertension than Nepal as found in this study [40–46]. The prevalence of  
23 undiagnosed hypertension in Nepal is relatively closer with that of Bangladesh [19]. This might  
24 be due to the less advanced health care systems of these two countries with both countries  
25 displaying lowHealth Care Index values [38].  
26  
27  
28  
29  
30  
31  
32  
33  
34  
35  
36  
37  
38  
39  
40  
41  
42  
43  
44  
45  
46  
47

48 In Nepal, despite the detection of risk factors [6,8,29] and inequalities [28], the prevalence of  
49 hypertension has been well investigated nationally, resulting in the implementation of new polices  
50 to mitigate the rising number of hypertension patients [47]. However, these policy reform efforts  
51 will fail to effectively achieve intended hypertension reduction targets if patients remain  
52  
53  
54  
55  
56  
57

1  
2  
3 undiagnosed, undetected and untreated. It is necessary to identify whether unequal distribution of  
4  
5 undiagnosed hypertension exists among patients with hypertension across different socioeconomic  
6  
7 groups. Such information will aid in setting priorities and effective allocation of resources. Our  
8  
9 study reveals existence of inequalities in the distribution of undiagnosed hypertension due to  
10  
11 economic status. Lower socioeconomic status groups experienced a higher prevalence of  
12  
13 undiagnosed hypertension compared to higher socioeconomic groups and a greater degree of  
14  
15 wealth-based inequality was concentrated among the poorest. These inequalities were more  
16  
17 prevalent among patients living in different geographical locations including place of residence,  
18  
19 ecological zones and administrative provinces. Such disparities may be owing to greater awareness  
20  
21 of health issues and more utilization of health care services among higher socioeconomic groups  
22  
23 [28]. Such inequality might increase the catastrophic health spending given the rise of catastrophic  
24  
25 household expenditure due to NCDs in Nepal [14,48]. Public health strategies might reduce this  
26  
27 gap by concentrating more on implementing social health insurance policies which are equitable  
28  
29 for all [40,48]. In this respect, policy makers could take into consideration the disparities in the  
30  
31 distribution of undiagnosed hypertension found in this study.  
32  
33  
34  
35  
36  
37

38 Several initiatives have been taken to control hypertension in Nepal. To address the burden of  
39  
40 cardiovascular diseases (CVD), the WHO and partners launched an initiative called “Global  
41  
42 Hearts” in 2016 [49]. This initiative took a comprehensive approach to help countries in scaling-  
43  
44 up affordable and adaptable measures to improve capacity of health care services to better detect  
45  
46 and treat people at risk of or suffering from CVD. This initiative comprises three packages:  
47  
48 SHAKE, HEARTS and MPOWER. The package “HEARTS” provides tools to incorporate CVD  
49  
50 management best practices at the primary healthcare level to reduce CVD risk factors such as  
51  
52 hypertension and high blood cholesterol. Like many low to middle incomes countries, Nepal has  
53  
54  
55  
56  
57

1  
2  
3 adapted the Global Hearts initiative to address CVD. In addition, the Community-based  
4 Management of Hypertension in Nepal (COBIN) is a community-based cost-effective intervention  
5  
6 with demonstrated success in reducing hypertension in Nepal [50,51]. However, for designing  
7  
8 future programs or interventions for the prevention of hypertension in Nepal, our findings highlight  
9  
10 the importance of considering undiagnosed hypertensive cases and the uneven distribution of such  
11  
12 cases across a spectrum of socio-demographic characteristics.  
13  
14  
15

16  
17 Failing to diagnose and detect hypertension among vulnerable populations will have detrimental  
18  
19 health outcomes for any nation. This study, for the first time at a national level, sheds light on the  
20  
21 prevalence of undiagnosed hypertension in Nepal. The NDHS 2016, through incorporation of  
22  
23 biomarker tests, bears evidence that a substantial proportion of individuals are suffering from  
24  
25 blood pressure abnormalities. This emphasises the need for conducting routine screening for  
26  
27 hypertension that ensures access by lower socioeconomic groups and at risk populations. A routine  
28  
29 surveillance system with technology-based screening can aid in tracing disease incidence including  
30  
31 among people at risk of being undiagnosed [52]. Our study findings will help inform and initiate  
32  
33 policies and programs that capture the highest domain of vulnerable populations and bring them  
34  
35 under routine surveillance at community level with optimal cost.  
36  
37  
38  
39  
40

### 41 **Strengths and limitations**

42  
43  
44 We used the most updated, nationally representative, cross-sectional data to determine the  
45  
46 prevalence, correlates and inequalities of undiagnosed hypertension in Nepal. We considered the  
47  
48 complex survey design in our methods and captured variations. However, there may be residuals  
49  
50 and unmeasured behavioral or lifestyle factors potentially relevant to undiagnosed hypertension,  
51  
52 for example, physical activity, dietary patterns and family history of hypertension, that were not  
53  
54 explored in this study. Since our data was cross-sectional, the relationship between undiagnosed  
55  
56  
57

1  
2  
3 hypertension and confounders were probabilistic rather than causal. However, identification of  
4 potential correlates through using odds ratio is widely acceptable. This study measured both  
5 absolute and relative inequalities in the prevalence of undiagnosed hypertension at national level  
6 as well as across place of residence, ecological zones and administrative provinces to further guide  
7 policy/decision makers for better allocation of resources to reduce hypertension rates.  
8  
9  
10  
11  
12  
13  
14  
15  
16  
17

## 18 **CONCLUSIONS**

19  
20  
21 For the first time on a national level in Nepal, this study estimates the prevalence of undiagnosed  
22 hypertension as 50.4% of respondents who tested positive for hypertension in the Nepal  
23 Demographic and Health Survey. Furthermore, our results show that prevalence of undiagnosed  
24 hypertension is disproportionately higher among lower socioeconomic status groups in Nepal. Our  
25 results suggest that efforts should be made to improve the knowledge, attitudes and practices of  
26 people around hypertension, particularly among those who are young, slender, poor and male,  
27 given their higher risk of being undiagnosed. Routine screening and strengthening diagnosis of  
28 hypertension in the primary level of healthcare service facilities may help Nepal in reducing cases  
29 with undiagnosed hypertension. Moreover, identification of inequalities among different risk  
30 groups will be beneficial in achieving the universal health coverage target of UN Sustainable  
31 Development Goals (Goal 3.8.1). Social health insurance policies under an integrated national  
32 NCD policy should be properly enacted to ensure socioeconomically disadvantaged populations  
33 are adequately covered under the scheme for the prevention and control of hypertension.  
34  
35  
36  
37  
38  
39  
40  
41  
42  
43  
44  
45  
46  
47  
48  
49  
50  
51  
52  
53

## 54 **Acknowledgments**

55 We acknowledge the MEASURE DHS for providing access to NDHS 2016 datasets.  
56  
57

## Contributors

MMH, SA and AAM conceptualized the study. MMH performed the data analysis and interpretation of the findings. MMH, FT, MT and AC contributed to writing. AAM and SA critically reviewed the analysis and final version of the manuscript. All authors made a thorough review of the final draft and approved it for submission.

## Funding

This research received no external funding.

## Competing interests

None declared.

## Ethical approval

The NDHS survey methodology and questionnaire was reviewed and approved by the ethical review board of Nepal Research Council and ICF Institutional. NDHS obtained informed consent from the respondents before conducting the survey. Therefore, separate ethical approval was not required for this study and we are using publicly available de-identified data.

## Data sharing statement

Data are available in a public, open access repository. All data related to study are included in the manuscript.

## REFERENCES

- 1 Forouzanfar MH, Afshin A, Alexander LT, *et al*. Global, regional, and national comparative risk assessment of 79 behavioural, environmental and occupational, and

- 1  
2  
3 metabolic risks or clusters of risks, 1990–2015: a systematic analysis for the Global  
4 Burden of Disease Study 2015. *Lancet* 2016;**388**:1659–724. doi:10.1016/S0140-  
5 6736(16)31679-8  
6
- 7 2 Fisher N, Curfman G. Hypertension-A public health challenge of global proportions.  
8 *JAMA* 2018;**320**:1757–1759.  
9
- 10 3 Day WH. World Health Organisation. A global brief on Hypertension. Published Online  
11 First: 2013. doi:10.1136/bmj.1.4815.882-a  
12
- 13 4 WHO Regional Office for South-East Asia. *Noncommunicable diseases in the South-East*  
14 *Asia Region, 2011: situation and response*. 2011.  
15 <https://apps.who.int/iris/handle/10665/205578>  
16
- 17 5 Mohan V, Seedat YK, Pradeepa R. The Rising Burden of Diabetes and Hypertension in  
18 Southeast Asian and African Regions: Need for Effective Strategies for Prevention and  
19 Control in Primary Health Care Settings. *Int J Hypertens* 2013;**2013**:1–14.  
20 doi:10.1155/2013/409083  
21
- 22 6 Agho KE, Osuagwu UL, Ezech OK, *et al*. Gender differences in factors associated with  
23 prehypertension and hypertension in Nepal: A nationwide survey. *PLoS One* 2018;**13**:1–  
24 18. doi:10.1371/journal.pone.0203278  
25
- 26 7 Vaidya A, Pathak RP, Pandey MR. Prevalence of hypertension in Nepalese community  
27 triples in 25 years: A repeat cross-sectional study in rural Kathmandu. *Indian Heart J*  
28 2012;**64**:128–31. doi:10.1016/S0019-4832(12)60045-5  
29
- 30 8 Hasan M, Sutradhar I, Akter T, *et al*. Prevalence and determinants of hypertension among  
31 adult population in Nepal: Data from Nepal demographic and health survey 2016. *PLoS*  
32 *One* 2018;**13**:1–14. doi:10.1371/journal.pone.0198028  
33
- 34 9 Ghimire A, Shrestha NR, Thapa L, *et al*. Prevalence of Hypertension, Obesity, Diabetes,  
35 and Metabolic Syndrome in Nepal. *Int J Hypertens* 2011;**2011**:1–9.  
36 doi:10.4061/2011/821971  
37
- 38 10 Shrestha UK, Singh DL, Bhattarai MD. The prevalence of hypertension and diabetes  
39 defined by fasting and 2-h plasma glucose criteria in urban Nepal. *Diabet Med*  
40 2006;**23**:1130–5. doi:10.1111/j.1464-5491.2006.01953.x  
41
- 42 11 Mehta KD, Karki P, Lamsal M, Paudel IS, Majhi S, Das BK, Sharma S, Jha N BN.  
43 Hyperglycemia, glucose intolerance, hypertension and socioeconomic position in eastern  
44 Nepal. *Southeast Asian J Trop Med Public Heal* 2011;**42**:197–207.  
45
- 46 12 McLachlan CS, Sharma R, Khanal V, *et al*. Prevalence of Hypertension in Member  
47 Countries of South Asian Association for Regional Cooperation (SAARC). *Medicine*  
48 (*Baltimore*) 2014;**93**:e74. doi:10.1097/md.0000000000000074  
49
- 50 13 Habits D. Non Communicable Diseases Risk Factors : STEPS Survey Nepal 2013. 2013.  
51
- 52 14 Dhital SM, Karki A. Dealing with the burden of hypertension in Nepal : current status ,  
53 challenges and health system issues. *Reg Heal Forum* 2013;**17**:44–52.  
54  
55  
56  
57  
58  
59  
60



- 1  
2  
3 15 MOHP New ERA and ICF DHS Program. Nepal Demographic and Health Survey 2016.  
4 2017;:636.  
5
- 6 16 Whelton PK, Carey RM, Aronow WS, *et al.* 2017  
7 *ACC/AHA/AAPA/ABC/ACPM/AGS/APhA/ASH/ASPC/NMA/PCNA guideline for the*  
8 *prevention, detection, evaluation, and management of high blood pressure in adults:*  
9 *Executive summary: A report of the American college of cardiology/American Heart*  
10 *Association task .* 2018. doi:10.1161/HYP.0000000000000066  
11
- 12 17 Chalmers J. 1999 World Health Organization-International Society of Hypertension  
13 guidelines for the management of hypertension. *Clin Exp Hypertens* 1999;**21**:1009–60.  
14 doi:10.3109/10641969909061028  
15
- 16 18 Hou X. Urban – Rural Disparity of and Untreated Hypertension in China. *Asia Pac J*  
17 *Public Heal* 2008;**20**:159–69.  
18
- 19 19 Ahmed S, Tariqujjaman M, Rahman MA, *et al.* Inequalities in the prevalence of  
20 undiagnosed hypertension among Bangladeshi adults: Evidence from a nationwide survey.  
21 *Int J Equity Health* 2019;**18**:1–12. doi:10.1186/s12939-019-0930-5  
22
- 23 20 World Health Organization. Nutrition Landcape Information System: Country Profile  
24 Indicators. 2010. doi:10.1159/000362780.Interpretation  
25
- 26 21 Wagstaff A. The bounds of the concentration index when the variable of interest is binary,  
27 with an application to immunization inequality. *Health Econ* 2005;**14**:429–32.  
28 doi:10.1002/hec.953  
29
- 30 22 Wagstaff A, Doorslaer E van, Paci P. On the measurement of horizontal inequity in the  
31 delivery of health care. *J Health Econ* 1991;**10**:169–205.  
32
- 33 23 Kakwani N, Wagstaff A, Doorslaer E van. Socioeconomic inequalities in health:  
34 measurement, computation and statistical inference. *J Econom* 1997;**77**:87–103.  
35
- 36 24 O’Donnell O, Doorslaer E Van. *Analyzing Health Equity Using Household Survey Data.,*  
37 *Washington.* 2008. doi:10.2471/BLT.08.052357  
38
- 39 25 Koolman X, Doorslaer E van. On the interpretation of a concentration index of inequality.  
40 *Health Econ* 2004;**13**:649–56.  
41
- 42 26 StataCorp. Stata Statistical Software: Release 13. 2013.  
43
- 44 27 Shrestha S, Shrestha A, Koju RP, *et al.* Barriers and facilitators to treatment among  
45 patients with newly diagnosed hypertension in Nepal. *Heart Asia* 2018;**10**:1–7.  
46 doi:10.1136/heartasia-2018-011047  
47
- 48 28 Mishra SR, Ghimire S, Shrestha N, *et al.* Socio-economic inequalities in hypertension  
49 burden and cascade of services: nationwide cross-sectional study in Nepal. *J Hum*  
50 *Hypertens* 2019;**33**:613–25. doi:10.1038/s41371-019-0165-3  
51
- 52 29 Chataut J, Adhikari R, Sinha N. The prevalence of and risk factors for hypertension in  
53 adults living in central development region of Nepal. *Kathmandu Univ Med J* 2011;**9**:13–  
54 8.  
55  
56  
57  
58  
59  
60

- 1  
2  
3 30 Kim Y, Kong KA. Do hypertensive individuals who are aware of their disease follow  
4 Lifestyle recommendations better than those who are not aware? *PLoS One* 2015;**10**:1–13.  
5 doi:10.1371/journal.pone.0136858  
6
- 7 31 Karmacharya BM, Koju RP, LoGerfo JP, *et al.* Awareness, treatment and control of  
8 hypertension in Nepal: Findings from the Dhulikhel Heart Study. *Heart Asia* 2017;**9**:1–8.  
9 doi:10.1136/heartasia-2016-010766  
10
- 11 32 Mehata S, Shrestha N, Mehta R, *et al.* Prevalence, awareness, treatment and control of  
12 hypertension in Nepal: Data from nationally representative population-based cross-  
13 sectional study. *J Hypertens* 2018;**36**:1680–8. doi:10.1097/HJH.0000000000001745  
14
- 15 33 Singh R, Fedacko J, Pella D, *et al.* Prevalence and risk factors for prehypertension and  
16 hypertension in five Indian cities. *Acta Cardiol* 2011;**66**.  
17
- 18 34 Dhungana RR, Pandey AR, Bista B, *et al.* Prevalence and Associated Factors of  
19 Hypertension: A Community-Based Cross-Sectional Study in Municipalities of  
20 Kathmandu, Nepal. *Int J Hypertens* 2016;**2016**. doi:10.1155/2016/1656938  
21
- 22 35 Schmieder RE. Hypertoniebedingte endorganschäden. *Dtsch Arztebl* 2010;**107**:866–73.  
23 doi:10.3238/arztebl.2010.0866  
24
- 25 36 Islam FM a, Bhuiyan a, Chakrabarti R, *et al.* Undiagnosed hypertension in a rural district  
26 in Bangladesh: The Bangladesh Population-based Diabetes and Eye Study (BPDES). *J*  
27 *Hum Hypertens* 2016;**30**:252–9. doi:10.1038/jhh.2015.65  
28
- 29 37 Ataklte F, Erqou S, Kaptoge S, *et al.* Burden of undiagnosed hypertension in sub-saharan  
30 africa: A systematic review and meta-analysis. *Hypertension* 2015;**65**:291–8.  
31 doi:10.1161/HYPERTENSIONAHA.114.04394  
32
- 33 38 NUMBEO. Health Care Index by Country 2020. 2020. [https://www.numbeo.com/health-care/rankings\\_by\\_country.jsp](https://www.numbeo.com/health-care/rankings_by_country.jsp) (accessed 11 Jun 2020).  
34
- 35 39 Zhou J, Fang S. Association between undiagnosed hypertension and health factors among  
36 middle-aged and elderly chinese population. *Int J Environ Res Public Health* 2019;**16**.  
37 doi:10.3390/ijerph16071214  
38
- 39 40 Zallman L, Himmelstein D, Woolhandler S, *et al.* Undiagnosed and Uncontrolled  
40 Hypertension and Hyperlipidemia among Immigrants in the US. *J Immigr Minor Heal*  
41 2013;**15**:858–65. doi:10.1007/s10903-012-9695-2.Undiagnosed  
42
- 43 41 Choo EH, Ihm SH, Lim S, *et al.* A simple screening score for undiagnosed hypertension.  
44 *Int J Cardiol* 2014;**172**:e465–7. doi:10.1016/j.ijcard.2014.01.040  
45
- 46 42 Abd Elaziz KM, Dewedar SA, Sabbour S, *et al.* Screening for hypertension among adults:  
47 Community outreach in Cairo, Egypt. *J Public Heal (United Kingdom)* 2015;**37**:701–6.  
48 doi:10.1093/pubmed/fdu085  
49
- 50 43 Chor D, Pinho Ribeiro AL, Sá Carvalho M, *et al.* Prevalence, awareness, treatment and  
51 influence of socioeconomic variables on control of high blood pressure: Results of the  
52 ELSA-Brasil study. *PLoS One* 2015;**10**:1–14. doi:10.1371/journal.pone.0127382  
53  
54  
55  
56  
57  
58  
59

- 1  
2  
3 44 Mosca I, Kenny RA. Exploring differences in prevalence of diagnosed, measured and  
4 undiagnosed hypertension: the case of Ireland and the United States of America. *Int J*  
5 *Public Health* 2014;**59**:759–67. doi:10.1007/s00038-014-0573-7  
6  
7 45 Saito Y, Davarian S, Takahashi A, *et al.* Diagnosis and Control of Hypertension in the  
8 Elderly Populations of Japan and the United States. *Int J Popul Stud* 2015;**1**:19–28.  
9 doi:10.1016/j.physbeh.2017.03.040  
10  
11 46 Marshall A, Nazroo J, Feeney K, *et al.* Comparison of hypertension healthcare outcomes  
12 among older people in the USA and England. *J Epidemiol Community Health*  
13 2016;**70**:264–70. doi:10.1136/jech-2014-205336  
14  
15 47 World Health Organization. Multisectoral Action Plan on the Prevention and Control of  
16 NCD (2014-2020). 2014. [https://extranet.who.int/nutrition/gina/sites/default/files/NPL](https://extranet.who.int/nutrition/gina/sites/default/files/NPL_2014_NCD_Multisectoral_Action_Plan.pdf)  
17 2014 NCD Multisectoral Action Plan.pdf  
18  
19 48 E. S, S. G, M.M. R, *et al.* Catastrophic household expenditure on health in Nepal: A cross-  
20 sectional survey. *Bull World Health Organ* 2014;**92**:760–7.  
21 doi:http://dx.doi.org/10.2471/BLT.13.126615  
22  
23 49 World Health Organization. Cardiovascular disease.  
24 [https://www.who.int/cardiovascular\\_diseases/global-hearts/Global\\_hearts\\_initiative/en/](https://www.who.int/cardiovascular_diseases/global-hearts/Global_hearts_initiative/en/)  
25  
26 50 Neupane D, McLachlan CS, Christensen B, *et al.* Community-based intervention for  
27 blood pressure reduction in Nepal (COBIN trial): Study protocol for a cluster-randomized  
28 controlled trial. *Trials* 2016;**17**:1–7. doi:10.1186/s13063-016-1412-3  
29  
30 51 Krishnan A, Finkelstein EA, Kallestrup P, *et al.* Cost-effectiveness and budget impact of  
31 the community-based management of hypertension in Nepal study (COBIN): a  
32 retrospective analysis. *Lancet Glob Heal* 2019;**7**:e1367–74. doi:10.1016/S2214-  
33 109X(19)30338-9  
34  
35 52 Rakotz MK, Ewigman BG, Sarav M, *et al.* A technology-based quality innovation to  
36 identify undiagnosed hypertension among active primary care patients. *Ann Fam Med*  
37 2014;**12**:352–8. doi:10.1370/afm.1665  
38  
39  
40  
41  
42  
43  
44  
45

46 **Table 1:** Characteristics of the study participants

| Variables | Total |     |         | Diagnosed hypertension |      |           | Undiagnosed hypertension |      |           | Chi-Square Statistic ( <i>p</i> -value) |
|-----------|-------|-----|---------|------------------------|------|-----------|--------------------------|------|-----------|-----------------------------------------|
|           | n     | %   | 95% CI  | n                      | %    | 95% CI    | n                        | %    | 95% CI    |                                         |
| Overall   | 3334  | --  | --      | 1634                   | 49.6 | 47.1-52.1 | 1700                     | 50.4 | 47.9-52.9 | --                                      |
| Age       |       |     |         |                        |      |           |                          |      |           | 29.6317                                 |
| 15-24     | 237   | 6.6 | 5.6-7.8 | 107                    | 43.1 | 36.1-50.4 | 130                      | 56.9 | 49.6-63.9 | 0.0008                                  |

|    |                             |      |      |           |      |      |           |      |      |           |         |
|----|-----------------------------|------|------|-----------|------|------|-----------|------|------|-----------|---------|
| 1  |                             |      |      |           |      |      |           |      |      |           |         |
| 2  |                             |      |      |           |      |      |           |      |      |           |         |
| 3  | 25-34                       | 449  | 13.2 | 11.9-14.5 | 196  | 43.8 | 38.4-49.3 | 253  | 56.2 | 50.7-61.6 |         |
| 4  | 35-44                       | 637  | 19.6 | 18-21.3   | 287  | 45.2 | 40.1-50.3 | 350  | 54.8 | 49.7-59.9 |         |
| 5  | 45-54                       | 687  | 20.9 | 19.2-22.8 | 333  | 49.4 | 45-53.8   | 354  | 50.6 | 46.2-55   |         |
| 6  | 55-64                       | 643  | 18.9 | 17.4-20.5 | 344  | 54.7 | 49.8-59.5 | 299  | 45.3 | 40.5-50.2 |         |
| 7  | >=65                        | 681  | 20.8 | 19-22.7   | 367  | 55.1 | 50.3-59.8 | 314  | 44.9 | 40.2-49.7 |         |
| 8  |                             |      |      |           |      |      |           |      |      |           |         |
| 9  |                             |      |      |           |      |      |           |      |      |           |         |
| 10 | <b>Sex</b>                  |      |      |           |      |      |           |      |      |           | 18.35   |
| 11 | Male                        | 1640 | 49.5 | 47.7-51.3 | 746  | 45.8 | 42.6-49.1 | 894  | 54.2 | 50.9-57.4 | 0.0003  |
| 12 | Female                      | 1694 | 50.5 | 48.7-52.3 | 888  | 53.3 | 50.1-56.4 | 806  | 46.7 | 43.6-49.9 |         |
| 13 |                             |      |      |           |      |      |           |      |      |           |         |
| 14 | <b>BMI</b>                  |      |      |           |      |      |           |      |      |           | 29.2511 |
| 15 | Normal                      | 1816 | 53.6 | 51.2-56.1 | 841  | 47.1 | 44.3-50   | 975  | 52.9 | 50-55.7   | 0.0001  |
| 16 | Thin                        | 361  | 11.1 | 9.9-12.5  | 156  | 42.2 | 35.7-49   | 205  | 57.8 | 51-64.3   |         |
| 17 | Overweight/obese            | 1120 | 35.2 | 32.5-38   | 620  | 55.6 | 51.7-59.5 | 500  | 44.4 | 40.5-48.3 |         |
| 18 |                             |      |      |           |      |      |           |      |      |           |         |
| 19 | <b>Education</b>            |      |      |           |      |      |           |      |      |           | 6.5852  |
| 20 | No education                | 1576 | 46.5 | 44.1-48.9 | 778  | 50.9 | 47.5-54.4 | 798  | 49.1 | 45.6-52.5 | 0.2125  |
| 21 | Primary                     | 602  | 17.8 | 16.2-19.5 | 285  | 46.1 | 41.1-51.1 | 317  | 53.9 | 48.9-58.9 |         |
| 22 | Secondary                   | 804  | 24.1 | 22.5-25.9 | 383  | 48   | 43.6-52.4 | 421  | 52   | 47.6-56.4 |         |
| 23 | Higher                      | 350  | 11.5 | 9.9-13.5  | 187  | 53   | 46.9-58.9 | 163  | 47   | 41.1-53.1 |         |
| 24 |                             |      |      |           |      |      |           |      |      |           |         |
| 25 | <b>Wealth Quintile</b>      |      |      |           |      |      |           |      |      |           | 90.7085 |
| 26 | Poorest                     | 610  | 15.5 | 13.3-18   | 211  | 35.9 | 31.9-40   | 399  | 64.1 | 60-68.1   | 0.0000  |
| 27 | Poorer                      | 689  | 19.2 | 16.9-21.7 | 313  | 44.2 | 39.8-48.7 | 376  | 55.8 | 51.3-60.2 |         |
| 28 | Middle                      | 604  | 17.3 | 15.2-19.6 | 301  | 49.5 | 44.5-54.5 | 303  | 50.5 | 45.5-55.5 |         |
| 29 | Richer                      | 667  | 19.7 | 17.1-22.6 | 344  | 50.2 | 44.9-55.5 | 323  | 49.8 | 44.5-55.1 |         |
| 30 | Richest                     | 764  | 28.3 | 24-33     | 465  | 60.4 | 55.4-65.2 | 299  | 39.6 | 34.8-44.6 |         |
| 31 |                             |      |      |           |      |      |           |      |      |           |         |
| 32 | <b>Place of residence</b>   |      |      |           |      |      |           |      |      |           | 16.691  |
| 33 | Urban                       | 2221 | 64.9 | 59.9-69.6 | 1152 | 52.2 | 49-55.4   | 1069 | 47.8 | 44.6-51   | 0.0057  |
| 34 | Rural                       | 1113 | 35.1 | 30.4-40.1 | 482  | 44.8 | 40.7-48.9 | 631  | 55.2 | 51.1-59.3 |         |
| 35 |                             |      |      |           |      |      |           |      |      |           |         |
| 36 | <b>Ecological zone</b>      |      |      |           |      |      |           |      |      |           | 3.43    |
| 37 | Mountain                    | 200  | 5.6  | 3.6-8.6   | 92   | 47.1 | 39.4-54.8 | 108  | 52.9 | 45.2-60.6 | 0.3721  |
| 38 | Hill                        | 1694 | 49.9 | 44.2-55.6 | 788  | 48.3 | 45.1-51.5 | 906  | 51.7 | 48.5-54.9 |         |
| 39 | Terai                       | 1440 | 44.5 | 39.2-49.9 | 754  | 51.4 | 47.1-55.6 | 686  | 48.6 | 44.4-52.9 |         |
| 40 |                             |      |      |           |      |      |           |      |      |           |         |
| 41 | <b>Province</b>             |      |      |           |      |      |           |      |      |           | 23.7869 |
| 42 | Province 1                  | 490  | 17   | 15.2-19   | 265  | 53   | 47.7-58.3 | 225  | 47   | 41.7-52.3 | 0.0511  |
| 43 | Province 2                  | 460  | 16.2 | 14.2-18.3 | 243  | 53.1 | 46.5-59.6 | 217  | 46.9 | 40.4-53.5 |         |
| 44 | Province 3                  | 575  | 26   | 21.8-30.6 | 303  | 52.7 | 46.8-58.5 | 272  | 47.3 | 41.5-53.2 |         |
| 45 | Province 4                  | 578  | 13.2 | 11.5-15.1 | 273  | 46.9 | 42-51.7   | 305  | 53.1 | 48.3-58   |         |
| 46 | Province 5                  | 553  | 17.8 | 15.4-20.4 | 253  | 45.4 | 39-51.9   | 300  | 54.6 | 48.1-61   |         |
| 47 | Province 6                  | 343  | 3.9  | 3.3-4.6   | 148  | 39.8 | 32.9-47.1 | 195  | 60.2 | 52.9-67.1 |         |
| 48 | Province 7                  | 335  | 6    | 5-7.2     | 149  | 41.9 | 33.8-50.5 | 186  | 58.1 | 49.5-66.2 |         |
| 49 |                             |      |      |           |      |      |           |      |      |           |         |
| 50 |                             |      |      |           |      |      |           |      |      |           |         |
| 51 | <b>Caffeine consumption</b> |      |      |           |      |      |           |      |      |           | 0.2587  |
| 52 | No                          | 2942 | 88.4 | 86.7-89.9 | 1434 | 49.4 | 46.9-52.0 | 1508 | 50.6 | 48.0-53.1 | 0.6895  |
| 53 | Yes                         | 392  | 11.6 | 10.1-13.3 | 200  | 50.8 | 44.1-57.4 | 192  | 49.2 | 42.6-55.8 |         |
| 54 |                             |      |      |           |      |      |           |      |      |           |         |
| 55 | <b>Tobacco use</b>          |      |      |           |      |      |           |      |      |           | 5.3524  |
| 56 |                             |      |      |           |      |      |           |      |      |           |         |
| 57 |                             |      |      |           |      |      |           |      |      |           |         |
| 58 |                             |      |      |           |      |      |           |      |      |           |         |
| 59 |                             |      |      |           |      |      |           |      |      |           |         |
| 60 |                             |      |      |           |      |      |           |      |      |           |         |

|                            |      |      |           |      |      |           |      |      |           |        |
|----------------------------|------|------|-----------|------|------|-----------|------|------|-----------|--------|
| No                         | 2826 | 84.9 | 83.2-86.6 | 1410 | 50.4 | 47.8-53.1 | 1416 | 49.6 | 46.9-52.2 | 0.0338 |
| Yes                        | 508  | 15.1 | 13.5-16.8 | 224  | 44.8 | 40.0-49.8 | 284  | 55.1 | 50.2-60.0 |        |
| <b>Alcohol consumption</b> |      |      |           |      |      |           |      |      |           | 2.4122 |
| No                         | 3249 | 97.8 | 97.1-98.4 | 1600 | 49.8 | 47.2-52.8 | 1649 | 50.2 | 47.6-52.8 | 0.1505 |
| Yes                        | 85   | 2.2  | 1.6-2.9   | 34   | 40.6 | 29.4-52.9 | 51   | 59.4 | 47.1-70.6 |        |

Note: n = Number of sample, CI = Confidence interval

**Figure 1:** Selection of participants

**Figure 2:** Determinants of undiagnosed hypertension among patients with hypertension in Nepal, 2016

**Figure 3:** Concentration curve to measure the wealth-based inequality in the prevalence of undiagnosed hypertension among patients with hypertension in Nepal, 2016

**Figure 4:** Socioeconomic inequalities in the prevalence of undiagnosed hypertension among patients with hypertension across geographical locations in Nepal, 2016

**Figure 1:** Selection of participants

**Figure 2:** Determinants of undiagnosed hypertension among patients with hypertension in Nepal, 2016



**Figure 3:** Concentration curve to measure the wealth-based inequality in the prevalence of undiagnosed hypertension among patients with hypertension in Nepal, 2016

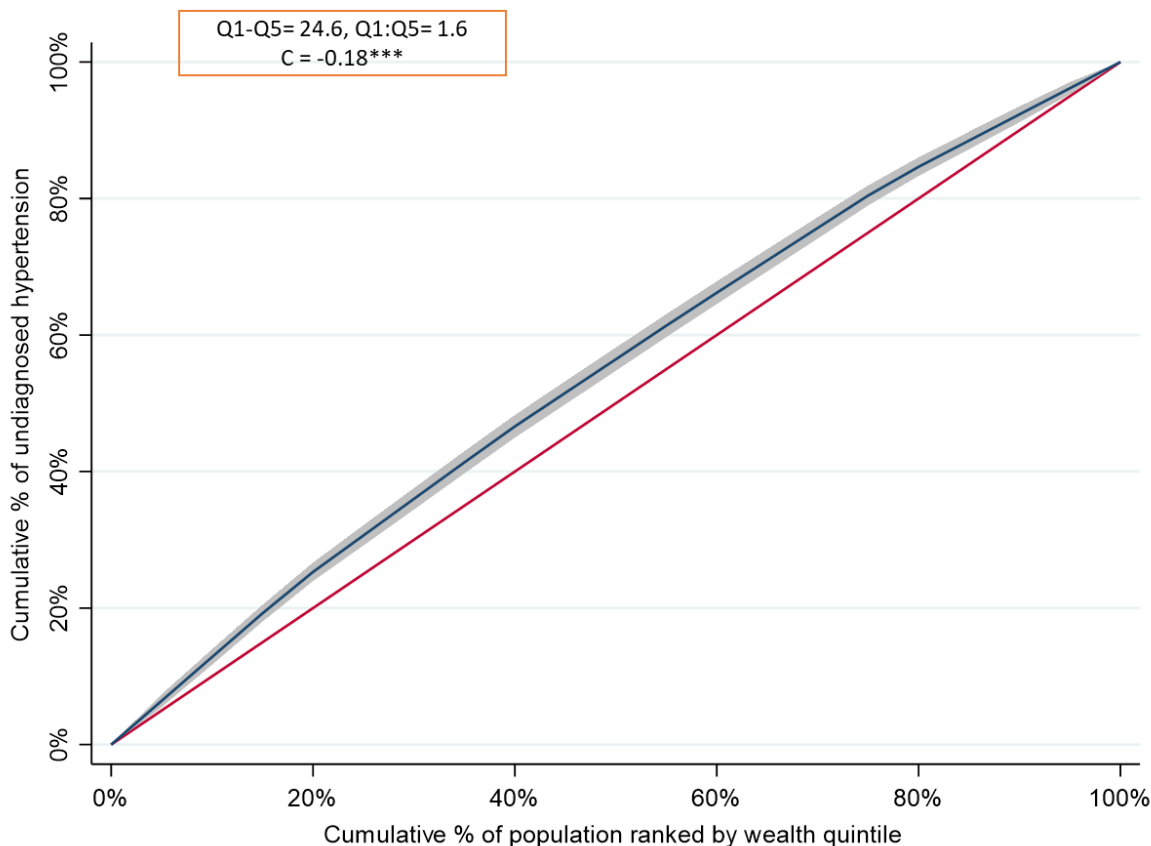

Note: Q1= Poorest quintile, Q2= Poorer quintile, Q3= Middle quintile, Q4= Richer quintile, Q5= Richest quintile, \*\*\*=p-value<0.001

only



**Figure 4:** Socioeconomic inequalities in the prevalence of undiagnosed hypertension among patients with hypertension across geographical locations in Nepal, 2016



Note: Q1=Poorest quintile, Q2= Poorer quintile, Q3= Middle quintile, Q4= Richer quintile, Q5= Richest quintile, \*\*\*= p-value<0.001, \*\*= p-value<0.01, \*= p-value<0.05

**Supplementary Table 1:** Unadjusted determinants of undiagnosed hypertension among patients with hypertension in Nepal, 2016

| Variables                 | COR  | 95% CI    | <i>p</i> -value |
|---------------------------|------|-----------|-----------------|
| <b>Age</b>                |      |           |                 |
| 15-24                     | 1    |           |                 |
| 25-34                     | 1.06 | 0.77-1.46 | 0.7090          |
| 35-44                     | 1.00 | 0.75-1.34 | 0.9800          |
| 45-54                     | 0.87 | 0.65-1.18 | 0.3760          |
| 55-64                     | 0.72 | 0.52-0.98 | 0.0400          |
| >=65                      | 0.70 | 0.52-0.96 | 0.0250          |
| <b>Sex</b>                |      |           |                 |
| Male                      | 1.32 | 1.14-1.53 | 0.0000          |
| Female                    | 1    |           |                 |
| <b>BMI</b>                |      |           |                 |
| Normal                    | 1    |           |                 |
| Thin                      | 1.13 | 0.91-1.41 | 0.2610          |
| Overweight/obese          | 0.70 | 0.6-0.8   | 0.0000          |
| <b>Education</b>          |      |           |                 |
| No education              | 1    |           |                 |
| Primary                   | 1.08 | 0.9-1.31  | 0.4010          |
| Secondary                 | 1.07 | 0.88-1.3  | 0.4790          |
| Higher                    | 0.85 | 0.66-1.09 | 0.2070          |
| <b>Wealth Quintile</b>    |      |           |                 |
| Poorest                   | 2.94 | 2.29-3.77 | 0.0000          |
| Poorer                    | 1.87 | 1.47-2.38 | 0.0000          |
| Middle                    | 1.57 | 1.23-1.99 | 0.0000          |
| Richer                    | 1.46 | 1.16-1.84 | 0.0010          |
| Richest                   | 1    |           |                 |
| <b>Place of residence</b> |      |           |                 |
| Urban                     | 1    |           |                 |
| Rural                     | 1.41 | 1.17-1.71 | 0.0000          |
| <b>Ecological zone</b>    |      |           |                 |
| Mountain                  | 1    |           |                 |
| Hill                      | 0.98 | 0.68-1.41 | 0.9100          |
| Terai                     | 0.78 | 0.53-1.12 | 0.1800          |
| <b>Province</b>           |      |           |                 |
| Province 1                | 1    |           |                 |
| Province 2                | 1.05 | 0.77-1.44 | 0.7540          |
| Province 3                | 1.06 | 0.78-1.44 | 0.7220          |
| Province 4                | 1.32 | 1-1.74    | 0.0530          |
| Province 5                | 1.40 | 1.01-1.92 | 0.0400          |
| Province 6                | 1.55 | 1.09-2.2  | 0.0140          |

|                             |      |           |        |
|-----------------------------|------|-----------|--------|
| Province 7                  | 1.47 | 0.99-2.18 | 0.0550 |
| <b>Caffeine consumption</b> |      |           |        |
| No                          | 1.00 |           |        |
| Yes                         | 0.91 | 0.72-1.15 | 0.4400 |
| <b>Tobacco consumption</b>  |      |           |        |
| No                          | 1.00 |           |        |
| Yes                         | 1.26 | 1.06-1.51 | 0.0100 |
| <b>Alcohol consumption</b>  |      |           |        |
| No                          | 1.00 |           |        |
| Yes                         | 1.46 | 0.91-2.32 | 0.1140 |

Note: COR= Crude Odds Ratio, CI= Confidence Interval

1  
2  
3  
4  
5  
6  
7  
8  
9  
10  
11  
12  
13  
14  
15  
16  
17  
18  
19  
20  
21  
22  
23  
24  
25  
26  
27  
28  
29  
30  
31  
32  
33  
34  
35  
36  
37  
38  
39  
40  
41  
42  
43  
44  
45  
46  
47  
48  
49  
50  
51  
52  
53  
54  
55  
56  
57  
58  
59  
60STROBE Statement—Checklist of items that should be included in reports of *cross-sectional studies*

|                              | Page No | Item No | Recommendation                                                                                                                                                                                               |
|------------------------------|---------|---------|--------------------------------------------------------------------------------------------------------------------------------------------------------------------------------------------------------------|
| <b>Title and abstract</b>    | 1       | 1       | (a) Indicate the study's design with a commonly used term in the title or the abstract                                                                                                                       |
|                              | 2-3     |         | (b) Provide in the abstract an informative and balanced summary of what was done and what was found                                                                                                          |
| <b>Introduction</b>          |         |         |                                                                                                                                                                                                              |
| Background/rationale         | 4-5     | 2       | Explain the scientific background and rationale for the investigation being reported                                                                                                                         |
| Objectives                   | 5       | 3       | State specific objectives, including any prespecified hypotheses                                                                                                                                             |
| <b>Methods</b>               |         |         |                                                                                                                                                                                                              |
| Study design                 | 5       | 4       | Present key elements of study design early in the paper                                                                                                                                                      |
| Setting                      | 5       | 5       | Describe the setting, locations, and relevant dates, including periods of recruitment, exposure, follow-up, and data collection                                                                              |
| Participants                 | 6       | 6       | (a) Give the eligibility criteria, and the sources and methods of selection of participants                                                                                                                  |
| Variables                    | 7-8     | 7       | Clearly define all outcomes, exposures, predictors, potential confounders, and effect modifiers. Give diagnostic criteria, if applicable                                                                     |
| Data sources/<br>measurement | 5       | 8*      | For each variable of interest, give sources of data and details of methods of assessment (measurement). Describe comparability of assessment methods if there is more than one group                         |
| Bias                         | 10      | 9       | Describe any efforts to address potential sources of bias                                                                                                                                                    |
| Study size                   | 6       | 10      | Explain how the study size was arrived at                                                                                                                                                                    |
| Quantitative variables       | 7-8     | 11      | Explain how quantitative variables were handled in the analyses. If applicable, describe which groupings were chosen and why                                                                                 |
| Statistical methods          | 8-9     | 12      | (a) Describe all statistical methods, including those used to control for confounding                                                                                                                        |
|                              | "n/a"   |         | (b) Describe any methods used to examine subgroups and interactions                                                                                                                                          |
|                              | "n/a"   |         | (c) Explain how missing data were addressed                                                                                                                                                                  |
|                              | "n/a"   |         | (d) If applicable, describe analytical methods taking account of sampling strategy                                                                                                                           |
|                              | "n/a"   |         | (e) Describe any sensitivity analyses                                                                                                                                                                        |
| <b>Results</b>               |         |         |                                                                                                                                                                                                              |
| Participants                 | 10      | 13*     | (a) Report numbers of individuals at each stage of study—eg numbers potentially eligible, examined for eligibility, confirmed eligible, included in the study, completing follow-up, and analysed            |
|                              | "n/a"   |         | (b) Give reasons for non-participation at each stage                                                                                                                                                         |
|                              | "n/a"   |         | (c) Consider use of a flow diagram                                                                                                                                                                           |
| Descriptive data             | 10      | 14*     | (a) Give characteristics of study participants (eg demographic, clinical, social) and information on exposures and potential confounders                                                                     |
|                              | "n/a"   |         | (b) Indicate number of participants with missing data for each variable of interest                                                                                                                          |
| Outcome data                 | 11      | 15*     | Report numbers of outcome events or summary measures                                                                                                                                                         |
| Main results                 | 11-13   | 16      | (a) Give unadjusted estimates and, if applicable, confounder-adjusted estimates and their precision (eg, 95% confidence interval). Make clear which confounders were adjusted for and why they were included |

|                          |       |    |                                                                                                                                                                            |
|--------------------------|-------|----|----------------------------------------------------------------------------------------------------------------------------------------------------------------------------|
|                          |       |    | (b) Report category boundaries when continuous variables were categorized                                                                                                  |
|                          |       |    | (c) If relevant, consider translating estimates of relative risk into absolute risk for a meaningful time period                                                           |
| Other analyses           | “n/a” | 17 | Report other analyses done—eg analyses of subgroups and interactions, and sensitivity analyses                                                                             |
| <b>Discussion</b>        |       |    |                                                                                                                                                                            |
| Key results              | 13-14 | 18 | Summarise key results with reference to study objectives                                                                                                                   |
| Limitations              | 17-18 | 19 | Discuss limitations of the study, taking into account sources of potential bias or imprecision. Discuss both direction and magnitude of any potential bias                 |
| Interpretation           | 14-17 | 20 | Give a cautious overall interpretation of results considering objectives, limitations, multiplicity of analyses, results from similar studies, and other relevant evidence |
| Generalisability         | 18    | 21 | Discuss the generalisability (external validity) of the study results                                                                                                      |
| <b>Other information</b> |       |    |                                                                                                                                                                            |
| Funding                  | 19    | 22 | Give the source of funding and the role of the funders for the present study and, if applicable, for the original study on which the present article is based              |

\*Give information separately for exposed and unexposed groups.

**Note:** An Explanation and Elaboration article discusses each checklist item and gives methodological background and published examples of transparent reporting. The STROBE checklist is best used in conjunction with this article (freely available on the Web sites of PLoS Medicine at <http://www.plosmedicine.org/>, Annals of Internal Medicine at <http://www.annals.org/>, and Epidemiology at <http://www.epidem.com/>). Information on the STROBE Initiative is available at [www.strobe-statement.org](http://www.strobe-statement.org).

# BMJ Open

## Examining the prevalence, correlates and inequalities of undiagnosed hypertension in Nepal: a population-based cross-sectional study

|                                 |                                                                                                                                                                                                                                                                                                                                                                                                                                                                                                                                                                                                                                                                                                                                                                                                                                                             |
|---------------------------------|-------------------------------------------------------------------------------------------------------------------------------------------------------------------------------------------------------------------------------------------------------------------------------------------------------------------------------------------------------------------------------------------------------------------------------------------------------------------------------------------------------------------------------------------------------------------------------------------------------------------------------------------------------------------------------------------------------------------------------------------------------------------------------------------------------------------------------------------------------------|
| Journal:                        | <i>BMJ Open</i>                                                                                                                                                                                                                                                                                                                                                                                                                                                                                                                                                                                                                                                                                                                                                                                                                                             |
| Manuscript ID                   | bmjopen-2020-037592.R3                                                                                                                                                                                                                                                                                                                                                                                                                                                                                                                                                                                                                                                                                                                                                                                                                                      |
| Article Type:                   | Original research                                                                                                                                                                                                                                                                                                                                                                                                                                                                                                                                                                                                                                                                                                                                                                                                                                           |
| Date Submitted by the Author:   | 22-Jun-2020                                                                                                                                                                                                                                                                                                                                                                                                                                                                                                                                                                                                                                                                                                                                                                                                                                                 |
| Complete List of Authors:       | Hasan, Md. Mehedi ; The University of Queensland Institute for Social Science Research,<br>Tasnim, Fariha; International Centre for Diarrhoeal Disease Research Bangladesh, Maternal and Child Health Division<br>Tariqujjaman, Md.; International Centre for Diarrhoeal Disease Research Bangladesh, Nutrition and Clinical Services Division<br>Ahmed, Sayem; Liverpool School of Tropical Medicine, Department of Tropical Biology; International Centre for Diarrhoeal Disease Research Bangladesh, Health Systems and Population Studies Division<br>Cleary, Anne; The University of Queensland, Institute for Social Science Research<br>Mamun, Abdullah; University of Queensland, Institute for Social Science Research; University of Queensland, ARC Centre of Excellence for Children and Families over the Life Course (The Life Course Centre) |
| <b>Primary Subject Heading</b>: | Epidemiology                                                                                                                                                                                                                                                                                                                                                                                                                                                                                                                                                                                                                                                                                                                                                                                                                                                |
| Secondary Subject Heading:      | Public health                                                                                                                                                                                                                                                                                                                                                                                                                                                                                                                                                                                                                                                                                                                                                                                                                                               |
| Keywords:                       | Hypertension < CARDIOLOGY, Public health < INFECTIOUS DISEASES, EPIDEMIOLOGY                                                                                                                                                                                                                                                                                                                                                                                                                                                                                                                                                                                                                                                                                                                                                                                |
|                                 |                                                                                                                                                                                                                                                                                                                                                                                                                                                                                                                                                                                                                                                                                                                                                                                                                                                             |

SCHOLARONE™  
Manuscripts



I, the Submitting Author has the right to grant and does grant on behalf of all authors of the Work (as defined in the below author licence), an exclusive licence and/or a non-exclusive licence for contributions from authors who are: i) UK Crown employees; ii) where BMJ has agreed a CC-BY licence shall apply, and/or iii) in accordance with the terms applicable for US Federal Government officers or employees acting as part of their official duties; on a worldwide, perpetual, irrevocable, royalty-free basis to BMJ Publishing Group Ltd ("BMJ") its licensees and where the relevant Journal is co-owned by BMJ to the co-owners of the Journal, to publish the Work in this journal and any other BMJ products and to exploit all rights, as set out in our [licence](#).

The Submitting Author accepts and understands that any supply made under these terms is made by BMJ to the Submitting Author unless you are acting as an employee on behalf of your employer or a postgraduate student of an affiliated institution which is paying any applicable article publishing charge ("APC") for Open Access articles. Where the Submitting Author wishes to make the Work available on an Open Access basis (and intends to pay the relevant APC), the terms of reuse of such Open Access shall be governed by a Creative Commons licence – details of these licences and which [Creative Commons](#) licence will apply to this Work are set out in our licence referred to above.

Other than as permitted in any relevant BMJ Author's Self Archiving Policies, I confirm this Work has not been accepted for publication elsewhere, is not being considered for publication elsewhere and does not duplicate material already published. I confirm all authors consent to publication of this Work and authorise the granting of this licence.

**Title:** Examining the prevalence, correlates and inequalities of undiagnosed hypertension in Nepal: a population-based cross-sectional study

**Authors:** Md. Mehedi Hasan<sup>1,2\*</sup>, Fariha Tasnim<sup>3</sup>, Md. Tariqujjaman<sup>4</sup>, Sayem Ahmed<sup>5-7</sup>, Anne Cleary<sup>1</sup> and Abdullah A Mamun<sup>1,2</sup>

### Author affiliations

<sup>1</sup> Institute for Social Science Research, The University of Queensland, Indooroopilly, Queensland 4068, Australia

<sup>2</sup> ARC Centre of Excellence for Children and Families over the Life Course (The Life Course Centre), The University of Queensland, Indooroopilly, Queensland 4068, Australia

<sup>3</sup> Maternal and Child Health Division, International Centre for Diarrhoeal Disease Research, Bangladesh (icddr,b), Dhaka, Bangladesh

<sup>4</sup> Nutrition and Clinical Services Division, International Centre for Diarrhoeal Disease Research, Bangladesh (icddr,b), Dhaka, Bangladesh

<sup>5</sup> Department of Tropical Biology, Liverpool School of Tropical Medicine, Liverpool, United Kingdom

<sup>6</sup> Health Systems and Population Studies Division, International Centre for Diarrhoeal Disease Research, Bangladesh (icddr,b), Dhaka, Bangladesh

<sup>7</sup> Health Economics and Policy Research Group, Department of Learning, Informatics, Management and Ethics, Karolinska Institutet, Stockholm, Sweden

\* Correspondence:

Md. Mehedi Hasan

Institute for Social Science Research

ARC Centre of Excellence for Children and Families over the Life Course

The University of Queensland

80 Meiers Road, Long Pocket Precinct, Indooroopilly, Queensland 4068, Australia

Phone: +61 470 237 155

Fax: + 61 7 334 67646

E-mail: [m.m.hasan@uqconnect.edu.au](mailto:m.m.hasan@uqconnect.edu.au)



## ABSTRACT

**Objective:** To examine the prevalence, correlates and socio-demographic inequalities of undiagnosed hypertension in Nepal.

**Design:** This study used cross-sectional 2016 Nepal Demographic and Health Survey (NDHS) data. Undiagnosed hypertensive patients were defined as a NDHS respondent who was diagnosed as hypertensive (systolic blood pressure  $\geq 140$  mmHg or diastolic blood pressure  $\geq 90$  mmHg) during the survey, but never took any prescribed anti-hypertensive medicine to lower/control blood pressure and was never identified as having hypertension by a health professional prior the survey. Multiple binary logistic regression analysis was performed, and Concentration Index was measured.

**Setting:** Nepal

**Participants:** Adult patients with hypertension

**Results:** Among 3334 hypertensive patients, 50.4% remained undiagnosed during the survey in Nepal. Adjusted model reveals that patients who were male, belonged to households other than the highest wealth quintile, and lived in Province 4 and Province 5 were at higher risk of remaining undiagnosed for hypertension. Patients who were 65+ years of age and were overweight/obese were at lower risk of remaining undiagnosed for hypertension. The poor-rich gap was 24.6 percentage points (Q1= 64.1% vs Q5= 39.6%) and poor:rich ratio was 1.6 (Q1/Q5= 1.6) in the prevalence of undiagnosed hypertension. Undiagnosed hypertension was disproportionately higher among lower socioeconomic status groups (Concentration Index, C= -0.18). Inequalities in the prevalence of undiagnosed hypertension further varied across other geographic locations including place of residence, ecological zones and administrative provinces.

1  
2  
3 **Conclusions:** Undiagnosed hypertension was highly prevalent in Nepal and there were substantial  
4 inequalities by socio-demographics and sub-national levels. Increasing awareness, strengthening  
5 routine screening to diagnose hypertension at primary health service facilities and enactment of  
6 social health insurance policy may help Nepal to prevent and control this burden.  
7  
8  
9  
10  
11  
12

13 **Keywords:** Undiagnosed hypertension, Inequality, Demographic and Health Survey, Nepal  
14  
15  
16  
17

#### 18 **Strengths and limitations of this study**

- 19 • This study determined the prevalence and correlates of undiagnosed hypertension in  
20 Nepal using the most updated, population-based, nationally representative data.  
21  
22
- 23 • This study measured both wealth-based absolute and relative inequalities in the  
24 prevalence of undiagnosed hypertension at national level as well as across place of  
25 residence, ecological zones and administrative provinces.  
26  
27
- 28 • The cross-sectional nature of the data limits us to measure causal association between  
29 undiagnosed hypertension and the explanatory variables studied.  
30  
31
- 32 • The association of some potential behavioral or lifestyle factors such as physical  
33 activity, dietary patterns and family history with undiagnosed hypertension remain  
34 unmeasured due to lack of available data.  
35  
36  
37  
38  
39  
40  
41  
42  
43  
44  
45  
46  
47  
48  
49  
50  
51  
52  
53  
54  
55  
56  
57  
58  
59  
60

## INTRODUCTION

Hypertension, or raised blood pressure, is a leading cause of global mortality and disability [1], affecting over one billion people annually [2]. Hypertension is a directing factor for cardiovascular diseases (CVDs), in particular heart diseases, myocardial infarctions, kidney failure, strokes, disability and premature deaths [2,3]. In South-East Asian countries, hypertension affects approximately one in three adults, accounting for nearly 1.5 million deaths annually and contributing to 9.4% of total deaths [4]. In South-East Asian countries, more than 50% of people with hypertension remain undiagnosed [5]. Nepal has one of the highest prevalence rates of hypertension among South-East Asian countries [6].

Currently, Nepal is facing an epidemiological transition with increasing prevalence of hypertension [7]. A study based on the Nepal Demographic and Health Survey 2016 reported about 20% of Nepalese adults (aged  $\geq 18$  years) had hypertension [8]. However, other studies have reported that the prevalence of hypertension ranges from 23% to 34% in Nepal [7,9–12], although not all of these studies are representative of the present day Nepalese population. In 2013, the national NCD risk factor survey showed that while 25.7% of adults aged 15-69 years had hypertension in Nepal, a further 42.7% of adults had never measured their blood pressure [13]. Correct diagnoses of hypertension is prerequisite to the prevention, control and proper treatment of this disease. In addition, failure to diagnose and treat hypertension early may lead to serious health hazards, disability in later life, or eventually death. In Nepal, a number of government, non-government and private health facilities are providing health services such as diagnosis, medication and treatment for hypertension. However, owing to challenges with workforce capacity, resourcing of health-care facilities, and out-of-pocket costs incurred by patients, the

1  
2  
3 current health care system in Nepal is not adequately prepared to support the diagnosis, treatment  
4 and control of hypertension [14].  
5  
6

7  
8 To prevent hypertension, the disease first needs to be diagnosed before any related complications  
9 arise. However, there is a lack of evidence about the prevalence of undiagnosed hypertension in  
10 Nepal at national and subnational levels. Information on the estimates of undiagnosed  
11 hypertension, and its related socio-demographic inequalities, at national and subnational level may  
12 assist policy makers in formulating effective strategies for screening, treatment and control as well  
13 as prevention of hypertension and associated burdens of disease, particularly among vulnerable  
14 groups. As such, we aimed to examine the prevalence, correlates and socio-demographic  
15 inequalities of undiagnosed hypertension in Nepal.  
16  
17  
18  
19  
20  
21  
22  
23  
24  
25

## 26 27 28 29 30 **METHODS**

### 31 32 33 **Data source**

34  
35 We used the most updated nationally representative cross-sectional data from Nepal Demographic  
36 and Health Survey (NDHS). While the data of Demographic and Health Surveys is managed by  
37 Measure Evaluation, the NDHS was conducted from June 2016 to January 2017 by a private  
38 research organization named “NEW ERA” under the monitoring and supervision of the Ministry  
39 of Health, Nepal. To estimate the prevalence of hypertension nationally in Nepal, the NDHS 2016  
40 obtained informed consent from the household head on behalf of all household members of each  
41 surveyed household [15]. For academic and scientific purposes, this anonymous dataset without  
42 any identifiers was made available by the ICF International, Maryland, United States [15]. We  
43 obtained approval to access and use these data to conduct this study.  
44  
45  
46  
47  
48  
49  
50  
51  
52  
53  
54  
55  
56  
57  
58  
59  
60

## Survey procedure and participants

In 2015, Nepal reformed and restructured municipality boundaries resulting in seven administrative provinces comprising several districts and urban-rural areas with smaller administrative units known as wards [8]. With comparatively greater household numbers, urban areas were further divided into enumeration areas (EA). The primary sampling unit (PSU) were wards, for both urban and rural areas [15]. Because of some changes in administrative areas, Nepal revised the sampling frame of National Population and Housing Census (NPHC). The 2016 NDHS used this revised sampling frame and applied a multistage survey which was conducted in two and three stages across rural and urban areas respectively. NDHS selected the PSUs proportionately to the size in the first stage and then the random selection of EAs from the systematic selection of households from each PSU in the second stage. In the third stage, the households were selected by using a stratified cluster sampling technique in urban areas. A detailed description of the methodology is available elsewhere [15]. A total of 11490 households were selected from 383 wards, of which 5520 households from 184 wards were from urban settings and 5970 households from 199 wards were from rural settings. From these households, all the residents aged 15 years or above were eligible for blood pressure measurement. With an overall response rate of 95%, a total of 14823 individuals participated in the survey. This study uses an analytical sample of adults (> 15 years) with hypertension (n = 3334). Figure 1 illustrates the procedure for selecting the study sample.

{Figure 1 will be added here}

## Outcome variable

To measure hypertension, the 2016 NDHS used the UA-767F/FAC (A&D Medical) automated device to record the blood pressure of the participants. With 5 minutes intervals between each measurement, the 2016 NDHS recorded the measurements of blood pressure three times in a sitting position. NDHS considered the last two measures of blood pressure levels and used their mean to detect hypertension. The survey used the World Health Organization (WHO) guidelines to report a participant as hypertensive [15]. The WHO guideline has integrated the 2017 guidelines of the American College of Cardiology/ American Society of Hypertension [16,17]. According to the WHO guideline, a participant with systolic blood pressure (SBP)  $\geq 140$  mmHg or diastolic blood pressure (DBP)  $\geq 90$  mmHg is diagnosed as a hypertension case. We also considered participants as hypertension patients if s/he was previously told by a health professional that they have hypertension or if they were already taking medication to control hypertension. Our outcome variable is undiagnosed hypertension. A patient is considered as undiagnosed for hypertension if, at the time of the survey, s/he was diagnosed as hypertensive (SBP  $\geq 140$  mmHg or DBP  $\geq 90$  mmHg) but never took any prescribed anti-hypertensive medicine to lower/control blood pressure and was never told by a health professional that they have hypertension prior the survey [18,19].

### **Explanatory variables**

This study considered a set of socio-demographic and behavioral characteristics as independent variables. Age (in years), sex, Body Mass Index (BMI) measured through dividing the weight by squared height ( $\text{kg}/\text{m}^2$ ), education level, household wealth status, place of residence, ecological zone, and provinces were considered as socio-demographic characteristics of the respondents. Age was categorized as 15-24, 25-34, 35-44, 45-54, 55-64 and  $\geq 65$  years. Sex had two categories, male and female. The BMI was categorized as thin/underweight ( $\text{BMI} < 18.5 \text{ kg}/\text{m}^2$ ), normal ( $18.5 \text{ kg}/\text{m}^2 \leq \text{BMI} < 25 \text{ kg}/\text{m}^2$ ) and overweight/obese ( $\text{BMI} \geq 25.0 \text{ kg}/\text{m}^2$ ) [20]. Based on the highest class

1  
2  
3 completed by the respondents, level of education was classified as no education, primary,  
4 secondary and higher. NDHS used principal component analysis [15] to construct the wealth index  
5 and order households into five socioeconomic quintiles (poorest, poorer, middle, richer and  
6 richest). The place of residence was stratified as urban and rural across all geographic locations.  
7  
8 Nepal was ecologically divided in Mountain, Hill and Terai. The seven administrative provinces  
9  
10 were identified as Province 1, Province 2, Province 3, Province 4, Province 5, Province 6 and  
11 Province 7. Three behavioral characteristics of respondents, caffeine, tobacco and alcohol  
12 consumption, were considered as independent variables each of which contained dichotomous  
13 response of whether or not the respondent consumed caffeine, tobacco or alcohol.  
14  
15  
16  
17  
18  
19  
20  
21  
22  
23

### 24 **Statistical analyses**

25  
26  
27 Using univariate analysis we described the prevalence of undiagnosed hypertension and  
28 background characteristics of the study patients. The estimates of each of the categorical variables  
29 included in this study were reported with numbers, weighted percentages and 95% confidence  
30 intervals (CIs) of estimates. The weighted prevalence of undiagnosed hypertension was  
31 determined across the background characteristics of the study patients from bivariate analysis.  
32  
33 Statistical significance was detected by applying Chi-square test. Then, we conducted simple and  
34 multiple binary logistic regression analyses to examine the correlates of undiagnosed hypertension.  
35  
36 The results of the regression analysis were presented in terms of odds ratio with respective 95%  
37 CIs. Variables that were statistically significant in simple logistic regression analysis were entered  
38 in the multiple regression model to estimate the adjusted odds ratio (AOR). Notably, the statistical  
39 significance was defined at 5% level ( $p$ -value  $< 0.05$ ). Variance inflation factors to detect  
40 multicollinearity among the independent variables were assessed before incorporating them into  
41 the multiple regression model. Due to hierarchical structure of NDHS data, we considered the  
42  
43  
44  
45  
46  
47  
48  
49  
50  
51  
52  
53  
54  
55  
56  
57  
58  
59  
60

1  
2  
3 cluster sampling design of the 2016 NDHS to estimate the prevalence and determinants in this  
4 study [15]. We excluded cases with missing values for blood pressure measurements.  
5  
6  
7

8 Proposed by Wagstaff [21] to measure the inequality, we estimated the concentration index (C),  
9  
10 to show the degree and direction of wealth-based inequality in undiagnosed hypertension  
11 prevalence. For the purpose of calculating C, the households were ranked from the poorest to the  
12 richest according to their socioeconomic characteristics. We plotted a concentration curve to  
13 portray the distribution of undiagnosed hypertension. The Y-axis of the concentration curve  
14 representing the cumulative proportion of undiagnosed hypertension and the X-axis represents the  
15 cumulative proportions of the population across wealth quintiles. When the concentration curve  
16 coincides with the diagonal, the prevalence of undiagnosed hypertension is treated as equally  
17 distributed across socioeconomic groups. In contrast, the concentration curve typically deviates  
18 from the diagonal if there exists inequalities in the prevalence of undiagnosed hypertension. The  
19 C is defined as twice the area between the concentration curve and the diagonal [22–24]. The index  
20 value can range between  $-1$  and  $+1$ , a positive value implies the prevalence of undiagnosed  
21 hypertension is more concentrated among higher socioeconomic status groups and a negative value  
22 implies the prevalence is more concentrated among lower socioeconomic status groups [23,25].  
23  
24 We repeated the estimation of C across other geographical locations such as place of residence,  
25 ecological zones and provinces to detect the group of patients with highest severity of  
26 socioeconomic inequalities in the prevalence of undiagnosed hypertension. STATA (version 13)  
27 was used to perform all the analyses [26].  
28  
29  
30  
31  
32  
33  
34  
35  
36  
37  
38  
39  
40  
41  
42  
43  
44  
45  
46  
47  
48  
49  
50  
51  
52  
53  
54  
55  
56  
57  
58  
59  
60



## Patient and public involvement

Patients and public were not involved in developing the research questions, measuring outcome and designing the study. Information of the participants was anonymous.

## RESULTS

### General Characteristics of the Study Participants

**Table 1** shows the general characteristics of the study participants. Among the patients studied, the average age of patients was 49.8 years (95% CI 49.1, 50.5) with the lowest percentage of patients in the 15-24 years age group (6.6%) and highest percentage of patients in the 45-54 years age group (20.9%). The sample was balanced among male (49.5%) and female (50.5%) participant. Nearly half of the patients were normal in terms of their BMI while more than one third of the patients were overweight/obese. Two-thirds of the patients resided in urban area (64.9%). The educational status of the patients were poor with nearly half of the patients having no education while 24.1% and 11.5% had secondary and higher education respectively. The highest number of patients belonged to richest wealth quintile (28.3%) and the lowest number of patients belonged to the poorest wealth quintile (15.5%). Also, the highest number of patients were from province 3 (26.0%) followed by province 5 (17.8%) and province 1 (17.0%). Only 5.6% of patients were from the mountain ecological zone.

**{Table 1 will be added here}**

## Prevalence of Undiagnosed Hypertension

Of the 3334 participants who had hypertension during the survey, more than half of them were detected as remaining undiagnosed (50.4%). The prevalence of undiagnosed hypertension among the patients varied across their age ( $p$ -value < 0.001), sex ( $p$ -value < 0.001), BMI ( $p$ -value < 0.001), wealth quintile ( $p$ -value < 0.001) and place of residence ( $p$ -value < 0.01). The prevalence of undiagnosed hypertension was higher among younger patients (15-24 years age group) and steadily decreased with the increase of age. The prevalence of undiagnosed hypertension was higher among male patients (54.2%) compared to female patients (46.7%). Compared to patients with normal BMI, the prevalence of undiagnosed hypertension was higher among patients with lower BMI (57.8%) and lower among overweight/obese patients (44.4%). Compared to patients of the richest wealth quintile (39.6%), the prevalence of undiagnosed hypertension was higher among patients of the poorest (64.1%) and poorer (55.8%) quintiles. The rate of undiagnosed hypertension was higher among rural patients (55.2%) compared to urban (47.8%). No educational, ecological and provincial variations in the prevalence of undiagnosed hypertension was observed (**Table 1**).

## Correlates of Undiagnosed Hypertension

We found that age, sex, BMI, wealth quintile, place of residence and province were significantly associated with the prevalence of undiagnosed hypertension among hypertensive patients in unadjusted logistic regression analysis (see **supplementary table 1**).

**Figure 2** represents the results of multiple logistic regression analysis. The multiple binary logistic regression model showed that age, sex, BMI, wealth quintile and province had significant

1  
2  
3 association with undiagnosed hypertension. Elderly patients ( $\geq 65$  years of age) had a lower  
4 likelihood of being undiagnosed for hypertension than patients aged 15-24 years (AOR = 0.65,  
5 95% CI 0.48, 0.91). Male patients were 1.29 times more likely than female patients to remain  
6 undiagnosed for hypertension (AOR = 1.29, 95% CI 1.11, 1.51). Compared to patients with normal  
7 BMI, overweight/obese patients (AOR = 0.80, 95% CI 0.69, 0.93) were less likely to have  
8 undiagnosed hypertension.  
9

10 We found wealth quintiles as potential correlates of undiagnosed hypertension. The risk of  
11 remaining undiagnosed for hypertension increased with decreasing socioeconomic status.  
12 Likelihood of having undiagnosed hypertension was greater among poorer socioeconomic status  
13 patients compared to higher socioeconomic quintiles. Patients of poorest and poorer wealth  
14 quintiles were 2.49 (AOR = 2.49; 95% CI 1.90, 3.30) and 1.67 (AOR = 1.67; 95% CI 1.29, 2.16)  
15 times more likely to have an undiagnosed hypertension condition than patients of the wealthiest  
16 quintile.  
17

18 Moreover, significant provincial variation was evident in the prevalence of undiagnosed  
19 hypertension among hypertensive patients. Patients of province 4 (AOR = 1.36, 95% CI 1.04, 1.79)  
20 and province 5 (AOR = 1.43, 95% CI 1.05, 1.95) were more likely to have undiagnosed  
21 hypertension than patients of province 1.  
22

23  
24  
25  
26  
27  
28  
29  
30  
31  
32  
33  
34  
35  
36  
37  
38  
39  
40  
41  
42  
43  
44 {Figure 2 will be added here}

#### 45 46 47 **Socioeconomic Inequalities in Undiagnosed Hypertension**

48  
49  
50 **Figure 3** depicts the inequalities in the prevalence of undiagnosed hypertension among  
51 hypertensive patients. The difference in the distribution of undiagnosed hypertension was 24.6%  
52 between the lowest wealth quintile (Q1) and highest wealth quintile (Q5), meaning that the  
53  
54  
55  
56  
57

1  
2  
3 prevalence of undiagnosed hypertension was greater by 24.6 percentage points among the poorest  
4 patients. The relative measure of inequality in terms of poor (Q1): rich (Q5) ratio was 1.6 for the  
5 prevalence of undiagnosed hypertension among patients, depicting that the prevalence of  
6 undiagnosed hypertension was 1.6 times higher among the poorest than the richest patients. We  
7 found negative value of the Concentration Index ( $C = -0.18$ ) which suggests that the prevalence of  
8 undiagnosed hypertension among hypertensive patients was disproportionately distributed among  
9 lower socioeconomic status groups.  
10  
11  
12  
13  
14  
15  
16  
17  
18  
19

20 **{Figure 3 will be added here}**  
21  
22

23 In addition, patients living in mountain areas and in province 7 had large gaps in the prevalence of  
24 undiagnosed hypertension (**Figure 4**). The higher Q1:Q5 ratio were observed among those who  
25 had large Q1-Q5 gaps in the prevalence of undiagnosed hypertension across different geographic  
26 locations. We found large negative values of  $C$  among those who had higher Q1-Q5 gaps and  
27 Q1:Q5 ratio for the prevalence of undiagnosed hypertension. See **Figure 4** for details.  
28  
29  
30  
31  
32  
33  
34

35 **{Figure 4 will be added here}**  
36  
37  
38  
39  
40

## 41 **DISCUSSION**

42  
43

44 Globally, to date few studies have been conducted on undiagnosed hypertension. For the first time,  
45 this study estimated the prevalence of undiagnosed hypertension in Nepal as 50.4% of respondents  
46 who tested positive for hypertension in the 2016 NDHS. In addition, this study identified the risk  
47 factors and inequalities associated with undiagnosed hypertension in Nepal. The high prevalence  
48 of undiagnosed hypertension identified in this study may be due to people's lack of awareness and  
49 willingness to partake in regular health check-ups in the absence of health issues, coupled with  
50  
51  
52  
53  
54  
55  
56  
57

1  
2  
3 accessibility barriers to screening services [27]. Lack of knowledge, attitudes and behaviours that  
4 promote healthy lifestyles as preventive measures to non-communicable diseases (NCDs) may  
5 also act as a driver of undiagnosed hypertension [27–29]. Community-based awareness raising of  
6 changing lifestyles to address the burden of NCDs might be effective in reducing this gap [30].  
7  
8  
9

10  
11  
12 Several studies have reported higher risks of hypertension among people who are older in age,  
13 male, urban dwellers, have higher education level, regularly consume tobacco and/or alcohol, or  
14 are overweight [6,8,28,29]. We found that patients aged 65+ years and who were overweight/obese  
15 were at lower risk of remaining undiagnosed from hypertension. Our findings depicted a greater  
16 proportion of undiagnosed hypertensive patients among those who were young and those with  
17 lower BMI. Young or underweight people may be less conscious about their health status as they  
18 might have the misconception that they are less likely to suffer from NCDs [31]. In addition, people  
19 from lower socioeconomic status groups in Nepal tend to have less knowledge and awareness  
20 about health hazards, typically have poorer access to services for screening diseases and lack the  
21 capacity to afford treatment costs for diseases [28]. This may contribute to the disproportionate  
22 occurrence of undiagnosed hypertension among lower socioeconomic status groups in Nepal.  
23  
24  
25  
26  
27  
28  
29  
30  
31  
32  
33  
34  
35  
36  
37  
38

39 Similar to risk factors of hypertension, undiagnosed hypertension was also more prevalent among  
40 males and tobacco users [6,29]. The higher rate of undiagnosed hypertension among males might  
41 be due to their lack of awareness and lower treatment rates than females [32]. Smoking, a main  
42 source of using tobacco, is well recognized to be associated with increased risk of hypertension in  
43 many settings, including Nepal [33,34]. However, there is lack of evidence to determine the extent  
44 to which tobacco use is related to patients remaining undiagnosed for hypertension. Our findings  
45 demonstrate that, in Nepal, factors other than tobacco use played independent roles in predicting  
46 the rate of undiagnosed hypertension. While differences in lifestyle practices between males and  
47  
48  
49  
50  
51  
52  
53  
54  
55  
56  
57  
58  
59  
60

1  
2  
3 females in Nepal may be a key factor behind different exposures, further research is needed to  
4  
5 identify the actual risk factors [29].  
6  
7

8 Undiagnosed hypertension may lead to adverse health consequences, including organ damage [35].  
9

10 The WHO, denoting hypertension as a silent killer, stated that the prevalence of hypertension is  
11  
12 higher in low- and middle-income countries compared to developed and high income countries  
13  
14 [3]. Our results support this claim and also align with findings from Bangladesh and Sub-Saharan  
15  
16 Africa [19,36,37]. Despite being neighbouring countries, the prevalence of undiagnosed  
17  
18 hypertension from this study (approximately 50%) is much higher than that of China[38]. For  
19  
20 example, recent evidence shows that the prevalence of undiagnosed hypertension in China is  
21  
22 28.8% [39]. The reason behind this difference might be due to the differences in age of study  
23  
24 participants. Our study assessed participants of age 15 years or older in Nepal, while the Chinese  
25  
26 study included older participants (over 45 years) who may be more aware of health conditions and  
27  
28 more likely to visit doctors for regular health check-ups. Findings from studies conducted in  
29  
30 countries with more developed health care systems and advanced screening processes such as  
31  
32 Japan, Korea, England, Ireland, Egypt, Brazil and USA were also found to have lower levels of  
33  
34 undiagnosed hypertension than Nepal as found in this study [40–46]. The prevalence of  
35  
36 undiagnosed hypertension in Nepal is relatively closer with that of Bangladesh [19]. This might  
37  
38 be due to the less advanced health care systems of these two countries with both countries  
39  
40 displaying lowHealth Care Index values [38].  
41  
42  
43  
44  
45  
46  
47

48 In Nepal, despite the detection of risk factors [6,8,29] and inequalities [28], the prevalence of  
49  
50 hypertension has been well investigated nationally, resulting in the implementation of new polices  
51  
52 to mitigate the rising number of hypertension patients [47]. However, these policy reform efforts  
53  
54 will fail to effectively achieve intended hypertension reduction targets if patients remain  
55  
56  
57

1  
2  
3 undiagnosed, undetected and untreated. It is necessary to identify whether unequal distribution of  
4  
5 undiagnosed hypertension exists among patients with hypertension across different socioeconomic  
6  
7 groups. Such information will aid in setting priorities and effective allocation of resources. Our  
8  
9 study reveals existence of inequalities in the distribution of undiagnosed hypertension due to  
10  
11 economic status. Lower socioeconomic status groups experienced a higher prevalence of  
12  
13 undiagnosed hypertension compared to higher socioeconomic groups and a greater degree of  
14  
15 wealth-based inequality was concentrated among the poorest. These inequalities were more  
16  
17 prevalent among patients living in different geographical locations including place of residence,  
18  
19 ecological zones and administrative provinces. Such disparities may be owing to greater awareness  
20  
21 of health issues and more utilization of health care services among higher socioeconomic groups  
22  
23 [28]. Such inequality might increase the catastrophic health spending given the rise of catastrophic  
24  
25 household expenditure due to NCDs in Nepal [14,48]. Public health strategies might reduce this  
26  
27 gap by concentrating more on implementing social health insurance policies which are equitable  
28  
29 for all [40,48]. In this respect, policy makers could take into consideration the disparities in the  
30  
31 distribution of undiagnosed hypertension found in this study.  
32  
33  
34  
35  
36  
37

38 Several initiatives have been taken to control hypertension in Nepal. To address the burden of  
39  
40 cardiovascular diseases (CVD), the WHO and partners launched an initiative called “Global  
41  
42 Hearts” in 2016 [49]. This initiative took a comprehensive approach to help countries in scaling-  
43  
44 up affordable and adaptable measures to improve capacity of health care services to better detect  
45  
46 and treat people at risk of or suffering from CVD. This initiative comprises three packages:  
47  
48 SHAKE, HEARTS and MPOWER. The package “HEARTS” provides tools to incorporate CVD  
49  
50 management best practices at the primary healthcare level to reduce CVD risk factors such as  
51  
52 hypertension and high blood cholesterol. Like many low to middle incomes countries, Nepal has  
53  
54  
55  
56  
57  
58  
59  
60

1  
2  
3 adapted the Global Hearts initiative to address CVD. In addition, the Community-based  
4 Management of Hypertension in Nepal (COBIN) is a community-based cost-effective intervention  
5  
6 with demonstrated success in reducing hypertension in Nepal [50,51]. However, for designing  
7  
8 future programs or interventions for the prevention of hypertension in Nepal, our findings highlight  
9  
10 the importance of considering undiagnosed hypertensive cases and the uneven distribution of such  
11  
12 cases across a spectrum of socio-demographic characteristics.  
13  
14  
15

16  
17 Failing to diagnose and detect hypertension among vulnerable populations will have detrimental  
18  
19 health outcomes for any nation. This study, for the first time at a national level, sheds light on the  
20  
21 prevalence of undiagnosed hypertension in Nepal. The NDHS 2016, through incorporation of  
22  
23 biomarker tests, bears evidence that a substantial proportion of individuals are suffering from  
24  
25 blood pressure abnormalities. This emphasises the need for conducting routine screening for  
26  
27 hypertension that ensures access by lower socioeconomic groups and at risk populations. A routine  
28  
29 surveillance system with technology-based screening can aid in tracing disease incidence including  
30  
31 among people at risk of being undiagnosed [52]. Our study findings will help inform and initiate  
32  
33 policies and programs that capture the highest domain of vulnerable populations and bring them  
34  
35 under routine surveillance at community level with optimal cost.  
36  
37  
38  
39  
40

### 41 **Strengths and limitations**

42  
43  
44 We used the most updated, nationally representative, cross-sectional data to determine the  
45  
46 prevalence, correlates and inequalities of undiagnosed hypertension in Nepal. We considered the  
47  
48 complex survey design in our methods and captured variations. However, there may be residuals  
49  
50 and unmeasured behavioral or lifestyle factors potentially relevant to undiagnosed hypertension,  
51  
52 for example, physical activity, dietary patterns and family history of hypertension, that were not  
53  
54 explored in this study. Since our data was cross-sectional, the relationship between undiagnosed  
55  
56  
57  
58  
59  
60



1  
2  
3 hypertension and confounders were probabilistic rather than causal. However, identification of  
4 potential correlates through using odds ratio is widely acceptable. This study measured both  
5 absolute and relative inequalities in the prevalence of undiagnosed hypertension at national level  
6 as well as across place of residence, ecological zones and administrative provinces to further guide  
7 policy/decision makers for better allocation of resources to reduce hypertension rates.  
8  
9  
10  
11  
12  
13  
14  
15  
16  
17

## 18 **CONCLUSIONS**

19  
20  
21 For the first time on a national level in Nepal, this study estimates the prevalence of undiagnosed  
22 hypertension as 50.4% of respondents who tested positive for hypertension in the Nepal  
23 Demographic and Health Survey. Furthermore, our results show that prevalence of undiagnosed  
24 hypertension is disproportionately higher among lower socioeconomic status groups in Nepal. Our  
25 results suggest that efforts should be made to improve the knowledge, attitudes and practices of  
26 people around hypertension, particularly among those who are young, slender, poor and male,  
27 given their higher risk of being undiagnosed. Routine screening and strengthening diagnosis of  
28 hypertension in the primary level of healthcare service facilities may help Nepal in reducing cases  
29 with undiagnosed hypertension. Moreover, identification of inequalities among different risk  
30 groups will be beneficial in achieving the universal health coverage target of UN Sustainable  
31 Development Goals (Goal 3.8.1). Social health insurance policies under an integrated national  
32 NCD policy should be properly enacted to ensure socioeconomically disadvantaged populations  
33 are adequately covered under the scheme for the prevention and control of hypertension.  
34  
35  
36  
37  
38  
39  
40  
41  
42  
43  
44  
45  
46  
47  
48  
49  
50  
51  
52  
53

## 54 **Acknowledgments**

55 We acknowledge the MEASURE DHS for providing access to NDHS 2016 datasets.  
56  
57

## Contributors

MMH, SA and AAM conceptualized the study. MMH contributed to data acquisition, data analysis, interpretation of the findings and drafting the manuscript. FT, MT and AC helped interpreting the results and contributed to drafting the manuscript. AAM, AC and SA critically reviewed the analysis and final version of the manuscript. All authors made a thorough review of the final draft. All authors read and approved the final manuscript for publication.

## Funding

This research received no external funding.

## Competing interests

None declared.

## Ethical approval

The NDHS survey methodology and questionnaire was reviewed and approved by the ethical review board of Nepal Research Council and ICF Institutional. NDHS obtained informed consent from the respondents before conducting the survey. Therefore, separate ethical approval was not required for this study and we are using publicly available de-identified data.

## Data sharing statement

Data are available in a public, open access repository. All data related to study are included in the manuscript.

## REFEENCES

- 1 Forouzanfar MH, Afshin A, Alexander LT, *et al*. Global, regional, and national comparative risk assessment of 79 behavioural, environmental and occupational, and metabolic risks or clusters of risks, 1990–2015: a systematic analysis for the Global Burden of Disease Study 2015. *Lancet* 2016;**388**:1659–724. doi:10.1016/S0140-6736(16)31679-8
- 2 Fisher N, Curfman G. Hypertension-A public health challenge of global proportions. *JAMA* 2018;**320**:1757–1759.
- 3 Day WH. World Health Organisation. A global brief on Hypertension. Published Online First: 2013. doi:10.1136/bmj.1.4815.882-a
- 4 WHO Regional Office for South-East Asia. *Noncommunicable diseases in the South-East Asia Region, 2011: situation and response*. 2011. <https://apps.who.int/iris/handle/10665/205578>
- 5 Mohan V, Seedat YK, Pradeepa R. The Rising Burden of Diabetes and Hypertension in Southeast Asian and African Regions: Need for Effective Strategies for Prevention and Control in Primary Health Care Settings. *Int J Hypertens* 2013;**2013**:1–14. doi:10.1155/2013/409083
- 6 Agho KE, Osuagwu UL, Ezeh OK, *et al*. Gender differences in factors associated with prehypertension and hypertension in Nepal: A nationwide survey. *PLoS One* 2018;**13**:1–18. doi:10.1371/journal.pone.0203278
- 7 Vaidya A, Pathak RP, Pandey MR. Prevalence of hypertension in Nepalese community triples in 25 years: A repeat cross-sectional study in rural Kathmandu. *Indian Heart J* 2012;**64**:128–31. doi:10.1016/S0019-4832(12)60045-5
- 8 Hasan M, Sutradhar I, Akter T, *et al*. Prevalence and determinants of hypertension among adult population in Nepal: Data from Nepal demographic and health survey 2016. *PLoS One* 2018;**13**:1–14. doi:10.1371/journal.pone.0198028
- 9 Ghimire A, Shrestha NR, Thapa L, *et al*. Prevalence of Hypertension, Obesity, Diabetes, and Metabolic Syndrome in Nepal. *Int J Hypertens* 2011;**2011**:1–9. doi:10.4061/2011/821971
- 10 Shrestha UK, Singh DL, Bhattarai MD. The prevalence of hypertension and diabetes defined by fasting and 2-h plasma glucose criteria in urban Nepal. *Diabet Med* 2006;**23**:1130–5. doi:10.1111/j.1464-5491.2006.01953.x
- 11 Mehta KD, Karki P, Lamsal M, Paudel IS, Majhi S, Das BK, Sharma S, Jha N BN. Hyperglycemia, glucose intolerance, hypertension and socioeconomic position in eastern Nepal. *Southeast Asian J Trop Med Public Heal* 2011;**42**:197–207.
- 12 McLachlan CS, Sharma R, Khanal V, *et al*. Prevalence of Hypertension in Member Countries of South Asian Association for Regional Cooperation (SAARC). *Medicine (Baltimore)* 2014;**93**:e74. doi:10.1097/md.0000000000000074
- 13 Habits D. Non Communicable Diseases Risk Factors : STEPS Survey Nepal 2013. 2013.
- 14 Dhital SM, Karki A. Dealing with the burden of hypertension in Nepal : current status ,

- challenges and health system issues. *Reg Heal Forum* 2013;**17**:44–52.
- 15 MOHP New ERA and ICF DHS Program. Nepal Demographic and Health Survey 2016. 2017;:636.
- 16 Whelton PK, Carey RM, Aronow WS, *et al.* 2017 ACC/AHA/AAPA/ABC/ACPM/AGS/APhA/ASH/ASPC/NMA/PCNA guideline for the prevention, detection, evaluation, and management of high blood pressure in adults: Executive summary: A report of the American college of cardiology/American Heart Association task . 2018. doi:10.1161/HYP.0000000000000066
- 17 Chalmers J. 1999 World Health Organization-International Society of Hypertension guidelines for the management of hypertension. *Clin Exp Hypertens* 1999;**21**:1009–60. doi:10.3109/10641969909061028
- 18 Hou X. Urban – Rural Disparity of and Untreated Hypertension in China. *Asia Pac J Public Heal* 2008;**20**:159–69.
- 19 Ahmed S, Tariqujjaman M, Rahman MA, *et al.* Inequalities in the prevalence of undiagnosed hypertension among Bangladeshi adults: Evidence from a nationwide survey. *Int J Equity Health* 2019;**18**:1–12. doi:10.1186/s12939-019-0930-5
- 20 World Health Organization. Nutrition Landacape Information System: Country Profile Indicators. 2010. doi:10.1159/000362780.Interpretation
- 21 Wagstaff A. The bounds of the concentration index when the variable of interest is binary, with an application to immunization inequality. *Health Econ* 2005;**14**:429–32. doi:10.1002/hec.953
- 22 Wagstaff A, Doorslaer E van, Paci P. On the measurement of horizontal inequity in the delivery of health care. *J Health Econ* 1991;**10**:169–205.
- 23 Kakwani N, Wagstaff A, Doorslaer E van. Socioeconomic inequalities in health: measurement, computation and statistical inference. *J Econom* 1997;**77**:87–103.
- 24 O’Donnell O, Doorslaer E Van. *Analyzing Health Equity Using Household Survey Data.* Washington. 2008. doi:10.2471/BLT.08.052357
- 25 Koolman X, Doorslaer E van. On the interpretation of a concentration index of inequality. *Health Econ* 2004;**13**:649–56.
- 26 StataCorp. Stata Statistical Software: Release 13. 2013.
- 27 Shrestha S, Shrestha A, Koju RP, *et al.* Barriers and facilitators to treatment among patients with newly diagnosed hypertension in Nepal. *Heart Asia* 2018;**10**:1–7. doi:10.1136/heartasia-2018-011047
- 28 Mishra SR, Ghimire S, Shrestha N, *et al.* Socio-economic inequalities in hypertension burden and cascade of services: nationwide cross-sectional study in Nepal. *J Hum Hypertens* 2019;**33**:613–25. doi:10.1038/s41371-019-0165-3
- 29 Chataut J, Adhikari R, Sinha N. The prevalence of and risk factors for hypertension in adults living in central development region of Nepal. *Kathmandu Univ Med J* 2011;**9**:13–

- 1  
2  
3 8.  
4  
5 30 Kim Y, Kong KA. Do hypertensive individuals who are aware of their disease follow  
6 Lifestyle recommendations better than those who are not aware? *PLoS One* 2015;**10**:1–13.  
7 doi:10.1371/journal.pone.0136858  
8  
9 31 Karmacharya BM, Koju RP, LoGerfo JP, *et al.* Awareness, treatment and control of  
10 hypertension in Nepal: Findings from the Dhulikhel Heart Study. *Heart Asia* 2017;**9**:1–8.  
11 doi:10.1136/heartasia-2016-010766  
12  
13 32 Mehata S, Shrestha N, Mehta R, *et al.* Prevalence, awareness, treatment and control of  
14 hypertension in Nepal: Data from nationally representative population-based cross-  
15 sectional study. *J Hypertens* 2018;**36**:1680–8. doi:10.1097/HJH.0000000000001745  
16  
17 33 Singh R, Fedacko J, Pella D, *et al.* Prevalence and risk factors for prehypertension and  
18 hypertension in five Indian cities. *Acta Cardiol* 2011;**66**.  
19  
20 34 Dhungana RR, Pandey AR, Bista B, *et al.* Prevalence and Associated Factors of  
21 Hypertension: A Community-Based Cross-Sectional Study in Municipalities of  
22 Kathmandu, Nepal. *Int J Hypertens* 2016;**2016**. doi:10.1155/2016/1656938  
23  
24 35 Schmieder RE. Hypertoniebedingte endorganschäden. *Dtsch Arztebl* 2010;**107**:866–73.  
25 doi:10.3238/arztebl.2010.0866  
26  
27 36 Islam FM a, Bhuiyan a, Chakrabarti R, *et al.* Undiagnosed hypertension in a rural district  
28 in Bangladesh: The Bangladesh Population-based Diabetes and Eye Study (BPDES). *J*  
29 *Hum Hypertens* 2016;**30**:252–9. doi:10.1038/jhh.2015.65  
30  
31 37 Ataklte F, Erqou S, Kaptoge S, *et al.* Burden of undiagnosed hypertension in sub-saharan  
32 africa: A systematic review and meta-analysis. *Hypertension* 2015;**65**:291–8.  
33 doi:10.1161/HYPERTENSIONAHA.114.04394  
34  
35 38 NUMBEO. Health Care Index by Country 2020. 2020.[https://www.numbeo.com/health-](https://www.numbeo.com/health-care/rankings_by_country.jsp)  
36 [care/rankings\\_by\\_country.jsp](https://www.numbeo.com/health-care/rankings_by_country.jsp) (accessed 11 Jun 2020).  
37  
38 39 Zhou J, Fang S. Association between undiagnosed hypertension and health factors among  
39 middle-aged and elderly chinese population. *Int J Environ Res Public Health* 2019;**16**.  
40 doi:10.3390/ijerph16071214  
41  
42 40 Zallman L, Himmelstein D, Woolhandler S, *et al.* Undiagnosed and Uncontrolled  
43 Hypertension and Hyperlipidemia among Immigrants in the US. *J Immigr Minor Heal*  
44 2013;**15**:858–65. doi:10.1007/s10903-012-9695-2.Undiagnosed  
45  
46 41 Choo EH, Ihm SH, Lim S, *et al.* A simple screening score for undiagnosed hypertension.  
47 *Int J Cardiol* 2014;**172**:e465–7. doi:10.1016/j.ijcard.2014.01.040  
48  
49 42 Abd Elaziz KM, Dewedar SA, Sabbour S, *et al.* Screening for hypertension among adults:  
50 Community outreach in Cairo, Egypt. *J Public Heal (United Kingdom)* 2015;**37**:701–6.  
51 doi:10.1093/pubmed/fdu085  
52  
53 43 Chor D, Pinho Ribeiro AL, Sá Carvalho M, *et al.* Prevalence, awareness, treatment and  
54 influence of socioeconomic variables on control of high blood pressure: Results of the  
55  
56  
57  
58  
59  
60

- 1  
2  
3 ELSA-Brasil study. *PLoS One* 2015;**10**:1–14. doi:10.1371/journal.pone.0127382
- 4  
5 44 Mosca I, Kenny RA. Exploring differences in prevalence of diagnosed, measured and  
6 undiagnosed hypertension: the case of Ireland and the United States of America. *Int J*  
7 *Public Health* 2014;**59**:759–67. doi:10.1007/s00038-014-0573-7
- 8  
9 45 Saito Y, Davarian S, Takahashi A, *et al.* Diagnosis and Control of Hypertension in the  
10 Elderly Populations of Japan and the United States. *Int J Popul Stud* 2015;**1**:19–28.  
11 doi:10.1016/j.physbeh.2017.03.040
- 12  
13 46 Marshall A, Nazroo J, Feeney K, *et al.* Comparison of hypertension healthcare outcomes  
14 among older people in the USA and England. *J Epidemiol Community Health*  
15 2016;**70**:264–70. doi:10.1136/jech-2014-205336
- 16  
17 47 World Health Organization. Multisectoral Action Plan on the Prevention and Control of  
18 NCD (2014-2020). 2014. [https://extranet.who.int/nutrition/gina/sites/default/files/NPL](https://extranet.who.int/nutrition/gina/sites/default/files/NPL_2014_NCD_Multisectoral_Action_Plan.pdf)  
19 [2014 NCD Multisectoral Action Plan.pdf](https://extranet.who.int/nutrition/gina/sites/default/files/NPL_2014_NCD_Multisectoral_Action_Plan.pdf)
- 20  
21 48 E. S, S. G, M.M. R, *et al.* Catastrophic household expenditure on health in Nepal: A cross-  
22 sectional survey. *Bull World Health Organ* 2014;**92**:760–7.  
23 doi:<http://dx.doi.org/10.2471/BLT.13.126615>
- 24  
25 49 World Health Organization. Cardiovascular disease.  
26 [https://www.who.int/cardiovascular\\_diseases/global-hearts/Global\\_hearts\\_initiative/en/](https://www.who.int/cardiovascular_diseases/global-hearts/Global_hearts_initiative/en/)
- 27  
28 50 Neupane D, McLachlan CS, Christensen B, *et al.* Community-based intervention for  
29 blood pressure reduction in Nepal (COBIN trial): Study protocol for a cluster-randomized  
30 controlled trial. *Trials* 2016;**17**:1–7. doi:10.1186/s13063-016-1412-3
- 31  
32 51 Krishnan A, Finkelstein EA, Kallestrup P, *et al.* Cost-effectiveness and budget impact of  
33 the community-based management of hypertension in Nepal study (COBIN): a  
34 retrospective analysis. *Lancet Glob Heal* 2019;**7**:e1367–74. doi:10.1016/S2214-  
35 109X(19)30338-9
- 36  
37 52 Rakotz MK, Ewigman BG, Sarav M, *et al.* A technology-based quality innovation to  
38 identify undiagnosed hypertension among active primary care patients. *Ann Fam Med*  
39 2014;**12**:352–8. doi:10.1370/afm.1665
- 40  
41  
42  
43  
44  
45  
46  
47  
48  
49

Table 1: Characteristics of the study participants

| Variables | Total |    |        | Diagnosed hypertension |      |           | Undiagnosed hypertension |      |           | Chi-Square Statistic (p-value) |
|-----------|-------|----|--------|------------------------|------|-----------|--------------------------|------|-----------|--------------------------------|
|           | n     | %  | 95% CI | n                      | %    | 95% CI    | n                        | %    | 95% CI    |                                |
| Overall   | 3334  | -- | --     | 1634                   | 49.6 | 47.1-52.1 | 1700                     | 50.4 | 47.9-52.9 | --                             |
| Age       |       |    |        |                        |      |           |                          |      |           | 29.6317                        |

|    |                             |      |      |           |      |      |           |      |      |           |         |
|----|-----------------------------|------|------|-----------|------|------|-----------|------|------|-----------|---------|
| 1  |                             |      |      |           |      |      |           |      |      |           |         |
| 2  |                             |      |      |           |      |      |           |      |      |           |         |
| 3  | 15-24                       | 237  | 6.6  | 5.6-7.8   | 107  | 43.1 | 36.1-50.4 | 130  | 56.9 | 49.6-63.9 | 0.0008  |
| 4  | 25-34                       | 449  | 13.2 | 11.9-14.5 | 196  | 43.8 | 38.4-49.3 | 253  | 56.2 | 50.7-61.6 |         |
| 5  | 35-44                       | 637  | 19.6 | 18-21.3   | 287  | 45.2 | 40.1-50.3 | 350  | 54.8 | 49.7-59.9 |         |
| 6  | 45-54                       | 687  | 20.9 | 19.2-22.8 | 333  | 49.4 | 45-53.8   | 354  | 50.6 | 46.2-55   |         |
| 7  | 55-64                       | 643  | 18.9 | 17.4-20.5 | 344  | 54.7 | 49.8-59.5 | 299  | 45.3 | 40.5-50.2 |         |
| 8  | >=65                        | 681  | 20.8 | 19-22.7   | 367  | 55.1 | 50.3-59.8 | 314  | 44.9 | 40.2-49.7 |         |
| 9  |                             |      |      |           |      |      |           |      |      |           |         |
| 10 |                             |      |      |           |      |      |           |      |      |           |         |
| 11 | <b>Sex</b>                  |      |      |           |      |      |           |      |      |           | 18.35   |
| 12 | Male                        | 1640 | 49.5 | 47.7-51.3 | 746  | 45.8 | 42.6-49.1 | 894  | 54.2 | 50.9-57.4 | 0.0003  |
| 13 | Female                      | 1694 | 50.5 | 48.7-52.3 | 888  | 53.3 | 50.1-56.4 | 806  | 46.7 | 43.6-49.9 |         |
| 14 |                             |      |      |           |      |      |           |      |      |           |         |
| 15 | <b>BMI</b>                  |      |      |           |      |      |           |      |      |           | 29.2511 |
| 16 | Normal                      | 1816 | 53.6 | 51.2-56.1 | 841  | 47.1 | 44.3-50   | 975  | 52.9 | 50-55.7   | 0.0001  |
| 17 | Thin                        | 361  | 11.1 | 9.9-12.5  | 156  | 42.2 | 35.7-49   | 205  | 57.8 | 51-64.3   |         |
| 18 | Overweight/obese            | 1120 | 35.2 | 32.5-38   | 620  | 55.6 | 51.7-59.5 | 500  | 44.4 | 40.5-48.3 |         |
| 19 |                             |      |      |           |      |      |           |      |      |           |         |
| 20 | <b>Education</b>            |      |      |           |      |      |           |      |      |           | 6.5852  |
| 21 | No education                | 1576 | 46.5 | 44.1-48.9 | 778  | 50.9 | 47.5-54.4 | 798  | 49.1 | 45.6-52.5 | 0.2125  |
| 22 | Primary                     | 602  | 17.8 | 16.2-19.5 | 285  | 46.1 | 41.1-51.1 | 317  | 53.9 | 48.9-58.9 |         |
| 23 | Secondary                   | 804  | 24.1 | 22.5-25.9 | 383  | 48   | 43.6-52.4 | 421  | 52   | 47.6-56.4 |         |
| 24 | Higher                      | 350  | 11.5 | 9.9-13.5  | 187  | 53   | 46.9-58.9 | 163  | 47   | 41.1-53.1 |         |
| 25 |                             |      |      |           |      |      |           |      |      |           |         |
| 26 | <b>Wealth Quintile</b>      |      |      |           |      |      |           |      |      |           | 90.7085 |
| 27 | Poorest                     | 610  | 15.5 | 13.3-18   | 211  | 35.9 | 31.9-40   | 399  | 64.1 | 60-68.1   | 0.0000  |
| 28 | Poorer                      | 689  | 19.2 | 16.9-21.7 | 313  | 44.2 | 39.8-48.7 | 376  | 55.8 | 51.3-60.2 |         |
| 29 | Middle                      | 604  | 17.3 | 15.2-19.6 | 301  | 49.5 | 44.5-54.5 | 303  | 50.5 | 45.5-55.5 |         |
| 30 | Richer                      | 667  | 19.7 | 17.1-22.6 | 344  | 50.2 | 44.9-55.5 | 323  | 49.8 | 44.5-55.1 |         |
| 31 | Richest                     | 764  | 28.3 | 24-33     | 465  | 60.4 | 55.4-65.2 | 299  | 39.6 | 34.8-44.6 |         |
| 32 |                             |      |      |           |      |      |           |      |      |           |         |
| 33 | <b>Place of residence</b>   |      |      |           |      |      |           |      |      |           | 16.691  |
| 34 | Urban                       | 2221 | 64.9 | 59.9-69.6 | 1152 | 52.2 | 49-55.4   | 1069 | 47.8 | 44.6-51   | 0.0057  |
| 35 | Rural                       | 1113 | 35.1 | 30.4-40.1 | 482  | 44.8 | 40.7-48.9 | 631  | 55.2 | 51.1-59.3 |         |
| 36 |                             |      |      |           |      |      |           |      |      |           |         |
| 37 | <b>Ecological zone</b>      |      |      |           |      |      |           |      |      |           | 3.43    |
| 38 | Mountain                    | 200  | 5.6  | 3.6-8.6   | 92   | 47.1 | 39.4-54.8 | 108  | 52.9 | 45.2-60.6 | 0.3721  |
| 39 | Hill                        | 1694 | 49.9 | 44.2-55.6 | 788  | 48.3 | 45.1-51.5 | 906  | 51.7 | 48.5-54.9 |         |
| 40 | Terai                       | 1440 | 44.5 | 39.2-49.9 | 754  | 51.4 | 47.1-55.6 | 686  | 48.6 | 44.4-52.9 |         |
| 41 |                             |      |      |           |      |      |           |      |      |           |         |
| 42 | <b>Province</b>             |      |      |           |      |      |           |      |      |           | 23.7869 |
| 43 | Province 1                  | 490  | 17   | 15.2-19   | 265  | 53   | 47.7-58.3 | 225  | 47   | 41.7-52.3 | 0.0511  |
| 44 | Province 2                  | 460  | 16.2 | 14.2-18.3 | 243  | 53.1 | 46.5-59.6 | 217  | 46.9 | 40.4-53.5 |         |
| 45 | Province 3                  | 575  | 26   | 21.8-30.6 | 303  | 52.7 | 46.8-58.5 | 272  | 47.3 | 41.5-53.2 |         |
| 46 | Province 4                  | 578  | 13.2 | 11.5-15.1 | 273  | 46.9 | 42-51.7   | 305  | 53.1 | 48.3-58   |         |
| 47 | Province 5                  | 553  | 17.8 | 15.4-20.4 | 253  | 45.4 | 39-51.9   | 300  | 54.6 | 48.1-61   |         |
| 48 | Province 6                  | 343  | 3.9  | 3.3-4.6   | 148  | 39.8 | 32.9-47.1 | 195  | 60.2 | 52.9-67.1 |         |
| 49 | Province 7                  | 335  | 6    | 5-7.2     | 149  | 41.9 | 33.8-50.5 | 186  | 58.1 | 49.5-66.2 |         |
| 50 |                             |      |      |           |      |      |           |      |      |           |         |
| 51 | <b>Caffeine consumption</b> |      |      |           |      |      |           |      |      |           | 0.2587  |
| 52 | No                          | 2942 | 88.4 | 86.7-89.9 | 1434 | 49.4 | 46.9-52.0 | 1508 | 50.6 | 48.0-53.1 | 0.6895  |
| 53 | Yes                         | 392  | 11.6 | 10.1-13.3 | 200  | 50.8 | 44.1-57.4 | 192  | 49.2 | 42.6-55.8 |         |
| 54 |                             |      |      |           |      |      |           |      |      |           |         |
| 55 |                             |      |      |           |      |      |           |      |      |           |         |
| 56 |                             |      |      |           |      |      |           |      |      |           |         |
| 57 |                             |      |      |           |      |      |           |      |      |           |         |
| 58 |                             |      |      |           |      |      |           |      |      |           |         |
| 59 |                             |      |      |           |      |      |           |      |      |           |         |
| 60 |                             |      |      |           |      |      |           |      |      |           |         |

|                            |      |      |           |      |      |           |      |      |           |        |
|----------------------------|------|------|-----------|------|------|-----------|------|------|-----------|--------|
| <b>Tobacco use</b>         |      |      |           |      |      |           |      |      |           | 5.3524 |
| No                         | 2826 | 84.9 | 83.2-86.6 | 1410 | 50.4 | 47.8-53.1 | 1416 | 49.6 | 46.9-52.2 | 0.0338 |
| Yes                        | 508  | 15.1 | 13.5-16.8 | 224  | 44.8 | 40.0-49.8 | 284  | 55.1 | 50.2-60.0 |        |
| <b>Alcohol consumption</b> |      |      |           |      |      |           |      |      |           | 2.4122 |
| No                         | 3249 | 97.8 | 97.1-98.4 | 1600 | 49.8 | 47.2-52.8 | 1649 | 50.2 | 47.6-52.8 | 0.1505 |
| Yes                        | 85   | 2.2  | 1.6-2.9   | 34   | 40.6 | 29.4-52.9 | 51   | 59.4 | 47.1-70.6 |        |

Note: n = Number of sample, CI = Confidence interval

**Figure 1:** Selection of participants

**Figure 2:** Determinants of undiagnosed hypertension among patients with hypertension in Nepal, 2016

**Figure 3:** Concentration curve to measure the wealth-based inequality in the prevalence of undiagnosed hypertension among patients with hypertension in Nepal, 2016

**Figure 4:** Socioeconomic inequalities in the prevalence of undiagnosed hypertension among patients with hypertension across geographical locations in Nepal, 2016



**Figure 1:** Selection of participants

**Figure 2:** Determinants of undiagnosed hypertension among patients with hypertension in Nepal, 2016



**Figure 3:** Concentration curve to measure the wealth-based inequality in the prevalence of undiagnosed hypertension among patients with hypertension in Nepal, 2016



**Figure 4:** Socioeconomic inequalities in the prevalence of undiagnosed hypertension among patients with hypertension across geographical locations in Nepal, 2016

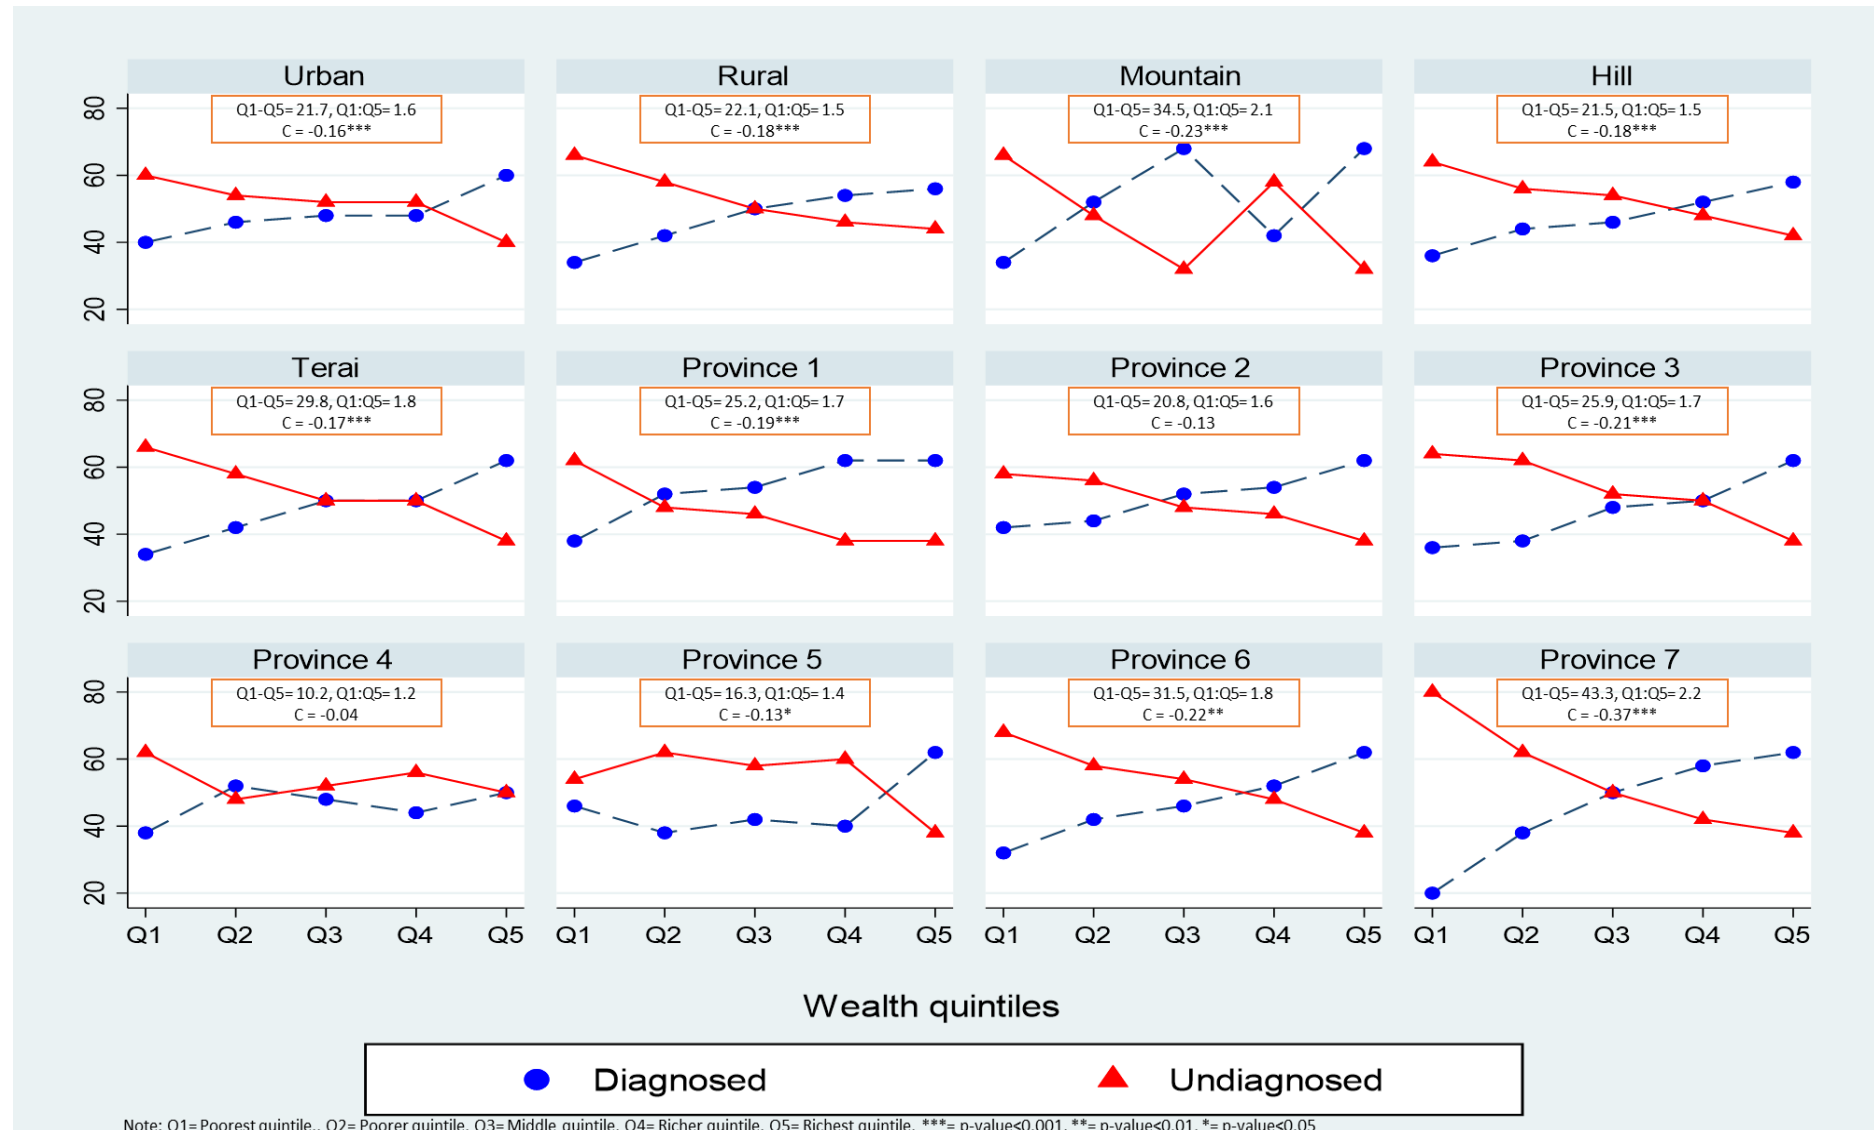

Note: Q1=Poorest quintile, Q2= Poorer quintile, Q3= Middle quintile, Q4= Richer quintile, Q5= Richest quintile, \*\*\*= p-value<0.001, \*\*= p-value<0.01, \*= p-value<0.05

**Supplementary Table 1:** Unadjusted determinants of undiagnosed hypertension among patients with hypertension in Nepal, 2016

| Variables                 | COR  | 95% CI    | p-value |
|---------------------------|------|-----------|---------|
| <b>Age</b>                |      |           |         |
| 15-24                     | 1    |           |         |
| 25-34                     | 1.06 | 0.77-1.46 | 0.7090  |
| 35-44                     | 1.00 | 0.75-1.34 | 0.9800  |
| 45-54                     | 0.87 | 0.65-1.18 | 0.3760  |
| 55-64                     | 0.72 | 0.52-0.98 | 0.0400  |
| >=65                      | 0.70 | 0.52-0.96 | 0.0250  |
| <b>Sex</b>                |      |           |         |
| Male                      | 1.32 | 1.14-1.53 | 0.0000  |
| Female                    | 1    |           |         |
| <b>BMI</b>                |      |           |         |
| Normal                    | 1    |           |         |
| Thin                      | 1.13 | 0.91-1.41 | 0.2610  |
| Overweight/obese          | 0.70 | 0.6-0.8   | 0.0000  |
| <b>Education</b>          |      |           |         |
| No education              | 1    |           |         |
| Primary                   | 1.08 | 0.9-1.31  | 0.4010  |
| Secondary                 | 1.07 | 0.88-1.3  | 0.4790  |
| Higher                    | 0.85 | 0.66-1.09 | 0.2070  |
| <b>Wealth Quintile</b>    |      |           |         |
| Poorest                   | 2.94 | 2.29-3.77 | 0.0000  |
| Poorer                    | 1.87 | 1.47-2.38 | 0.0000  |
| Middle                    | 1.57 | 1.23-1.99 | 0.0000  |
| Richer                    | 1.46 | 1.16-1.84 | 0.0010  |
| Richest                   | 1    |           |         |
| <b>Place of residence</b> |      |           |         |
| Urban                     | 1    |           |         |
| Rural                     | 1.41 | 1.17-1.71 | 0.0000  |
| <b>Ecological zone</b>    |      |           |         |
| Mountain                  | 1    |           |         |
| Hill                      | 0.98 | 0.68-1.41 | 0.9100  |
| Terai                     | 0.78 | 0.53-1.12 | 0.1800  |
| <b>Province</b>           |      |           |         |
| Province 1                | 1    |           |         |
| Province 2                | 1.05 | 0.77-1.44 | 0.7540  |
| Province 3                | 1.06 | 0.78-1.44 | 0.7220  |
| Province 4                | 1.32 | 1-1.74    | 0.0530  |
| Province 5                | 1.40 | 1.01-1.92 | 0.0400  |
| Province 6                | 1.55 | 1.09-2.2  | 0.0140  |

|                             |      |           |        |
|-----------------------------|------|-----------|--------|
| Province 7                  | 1.47 | 0.99-2.18 | 0.0550 |
| <b>Caffeine consumption</b> |      |           |        |
| No                          | 1.00 |           |        |
| Yes                         | 0.91 | 0.72-1.15 | 0.4400 |
| <b>Tobacco consumption</b>  |      |           |        |
| No                          | 1.00 |           |        |
| Yes                         | 1.26 | 1.06-1.51 | 0.0100 |
| <b>Alcohol consumption</b>  |      |           |        |
| No                          | 1.00 |           |        |
| Yes                         | 1.46 | 0.91-2.32 | 0.1140 |

Note: COR= Crude Odds Ratio, CI= Confidence Interval

1  
2  
3  
4  
5  
6  
7  
8  
9  
10  
11  
12  
13  
14  
15  
16  
17  
18  
19  
20  
21  
22  
23  
24  
25  
26  
27  
28  
29  
30  
31  
32  
33  
34  
35  
36  
37  
38  
39  
40  
41  
42  
43  
44  
45  
46  
47  
48  
49  
50  
51  
52  
53  
54  
55  
56  
57  
58  
59  
60STROBE Statement—Checklist of items that should be included in reports of *cross-sectional studies*

|                              | Page No | Item No | Recommendation                                                                                                                                                                                               |
|------------------------------|---------|---------|--------------------------------------------------------------------------------------------------------------------------------------------------------------------------------------------------------------|
| <b>Title and abstract</b>    | 1       | 1       | (a) Indicate the study's design with a commonly used term in the title or the abstract                                                                                                                       |
|                              | 2-3     |         | (b) Provide in the abstract an informative and balanced summary of what was done and what was found                                                                                                          |
| <b>Introduction</b>          |         |         |                                                                                                                                                                                                              |
| Background/rationale         | 4-5     | 2       | Explain the scientific background and rationale for the investigation being reported                                                                                                                         |
| Objectives                   | 5       | 3       | State specific objectives, including any prespecified hypotheses                                                                                                                                             |
| <b>Methods</b>               |         |         |                                                                                                                                                                                                              |
| Study design                 | 5       | 4       | Present key elements of study design early in the paper                                                                                                                                                      |
| Setting                      | 5       | 5       | Describe the setting, locations, and relevant dates, including periods of recruitment, exposure, follow-up, and data collection                                                                              |
| Participants                 | 6       | 6       | (a) Give the eligibility criteria, and the sources and methods of selection of participants                                                                                                                  |
| Variables                    | 7-8     | 7       | Clearly define all outcomes, exposures, predictors, potential confounders, and effect modifiers. Give diagnostic criteria, if applicable                                                                     |
| Data sources/<br>measurement | 5       | 8*      | For each variable of interest, give sources of data and details of methods of assessment (measurement). Describe comparability of assessment methods if there is more than one group                         |
| Bias                         | 10      | 9       | Describe any efforts to address potential sources of bias                                                                                                                                                    |
| Study size                   | 6       | 10      | Explain how the study size was arrived at                                                                                                                                                                    |
| Quantitative variables       | 7-8     | 11      | Explain how quantitative variables were handled in the analyses. If applicable, describe which groupings were chosen and why                                                                                 |
| Statistical methods          | 8-9     | 12      | (a) Describe all statistical methods, including those used to control for confounding                                                                                                                        |
|                              | "n/a"   |         | (b) Describe any methods used to examine subgroups and interactions                                                                                                                                          |
|                              | "n/a"   |         | (c) Explain how missing data were addressed                                                                                                                                                                  |
|                              | "n/a"   |         | (d) If applicable, describe analytical methods taking account of sampling strategy                                                                                                                           |
|                              | "n/a"   |         | (e) Describe any sensitivity analyses                                                                                                                                                                        |
| <b>Results</b>               |         |         |                                                                                                                                                                                                              |
| Participants                 | 10      | 13*     | (a) Report numbers of individuals at each stage of study—eg numbers potentially eligible, examined for eligibility, confirmed eligible, included in the study, completing follow-up, and analysed            |
|                              | "n/a"   |         | (b) Give reasons for non-participation at each stage                                                                                                                                                         |
|                              | "n/a"   |         | (c) Consider use of a flow diagram                                                                                                                                                                           |
| Descriptive data             | 10      | 14*     | (a) Give characteristics of study participants (eg demographic, clinical, social) and information on exposures and potential confounders                                                                     |
|                              | "n/a"   |         | (b) Indicate number of participants with missing data for each variable of interest                                                                                                                          |
| Outcome data                 | 11      | 15*     | Report numbers of outcome events or summary measures                                                                                                                                                         |
| Main results                 | 11-13   | 16      | (a) Give unadjusted estimates and, if applicable, confounder-adjusted estimates and their precision (eg, 95% confidence interval). Make clear which confounders were adjusted for and why they were included |

|                          |       |    |                                                                                                                                                                            |
|--------------------------|-------|----|----------------------------------------------------------------------------------------------------------------------------------------------------------------------------|
|                          |       |    | (b) Report category boundaries when continuous variables were categorized                                                                                                  |
|                          |       |    | (c) If relevant, consider translating estimates of relative risk into absolute risk for a meaningful time period                                                           |
| Other analyses           | “n/a” | 17 | Report other analyses done—eg analyses of subgroups and interactions, and sensitivity analyses                                                                             |
| <b>Discussion</b>        |       |    |                                                                                                                                                                            |
| Key results              | 13-14 | 18 | Summarise key results with reference to study objectives                                                                                                                   |
| Limitations              | 17-18 | 19 | Discuss limitations of the study, taking into account sources of potential bias or imprecision. Discuss both direction and magnitude of any potential bias                 |
| Interpretation           | 14-17 | 20 | Give a cautious overall interpretation of results considering objectives, limitations, multiplicity of analyses, results from similar studies, and other relevant evidence |
| Generalisability         | 18    | 21 | Discuss the generalisability (external validity) of the study results                                                                                                      |
| <b>Other information</b> |       |    |                                                                                                                                                                            |
| Funding                  | 19    | 22 | Give the source of funding and the role of the funders for the present study and, if applicable, for the original study on which the present article is based              |

\*Give information separately for exposed and unexposed groups.

**Note:** An Explanation and Elaboration article discusses each checklist item and gives methodological background and published examples of transparent reporting. The STROBE checklist is best used in conjunction with this article (freely available on the Web sites of PLoS Medicine at <http://www.plosmedicine.org/>, Annals of Internal Medicine at <http://www.annals.org/>, and Epidemiology at <http://www.epidem.com/>). Information on the STROBE Initiative is available at [www.strobe-statement.org](http://www.strobe-statement.org).
