# Supplementary material for: Examining the prevalence, correlates and inequalities of undiagnosed hypertension in Nepal: a population-based cross-sectional study
Source: PubMed Central journal article supplement — BMJ Open. 2020 Oct 1;10(10):e037592. doi: 10.1136/bmjopen-2020-037592 (PMC7534699; doi:10.1136/bmjopen-2020-037592), 2020-10-01
Supplement: bmjopen-2020-037592supp001.pdf [file bmjopen-2020-037592supp001.pdf]

**Supplementary Table 1:** Unadjusted determinants of undiagnosed hypertension among patients with hypertension in Nepal, 2016

| <b>Variables</b>          | <b>COR</b> | <b>95% CI</b> | <b>p-value</b> |
|---------------------------|------------|---------------|----------------|
| <b>Age</b>                |            |               |                |
| 15-24                     | 1          |               |                |
| 25-34                     | 1.06       | 0.77-1.46     | 0.7090         |
| 35-44                     | 1.00       | 0.75-1.34     | 0.9800         |
| 45-54                     | 0.87       | 0.65-1.18     | 0.3760         |
| 55-64                     | 0.72       | 0.52-0.98     | 0.0400         |
| >=65                      | 0.70       | 0.52-0.96     | 0.0250         |
| <b>Sex</b>                |            |               |                |
| Male                      | 1.32       | 1.14-1.53     | 0.0000         |
| Female                    | 1          |               |                |
| <b>BMI</b>                |            |               |                |
| Normal                    | 1          |               |                |
| Thin                      | 1.13       | 0.91-1.41     | 0.2610         |
| Overweight/obese          | 0.70       | 0.6-0.8       | 0.0000         |
| <b>Education</b>          |            |               |                |
| No education              | 1          |               |                |
| Primary                   | 1.08       | 0.9-1.31      | 0.4010         |
| Secondary                 | 1.07       | 0.88-1.3      | 0.4790         |
| Higher                    | 0.85       | 0.66-1.09     | 0.2070         |
| <b>Wealth Quintile</b>    |            |               |                |
| Poorest                   | 2.94       | 2.29-3.77     | 0.0000         |
| Poorer                    | 1.87       | 1.47-2.38     | 0.0000         |
| Middle                    | 1.57       | 1.23-1.99     | 0.0000         |
| Richer                    | 1.46       | 1.16-1.84     | 0.0010         |
| Richest                   | 1          |               |                |
| <b>Place of residence</b> |            |               |                |
| Urban                     | 1          |               |                |
| Rural                     | 1.41       | 1.17-1.71     | 0.0000         |
| <b>Ecological zone</b>    |            |               |                |
| Mountain                  | 1          |               |                |
| Hill                      | 0.98       | 0.68-1.41     | 0.9100         |
| Terai                     | 0.78       | 0.53-1.12     | 0.1800         |
| <b>Province</b>           |            |               |                |
| Province 1                | 1          |               |                |
| Province 2                | 1.05       | 0.77-1.44     | 0.7540         |
| Province 3                | 1.06       | 0.78-1.44     | 0.7220         |
| Province 4                | 1.32       | 1-1.74        | 0.0530         |
| Province 5                | 1.40       | 1.01-1.92     | 0.0400         |
| Province 6                | 1.55       | 1.09-2.2      | 0.0140         |

|                             |      |           |        |
|-----------------------------|------|-----------|--------|
| Province 7                  | 1.47 | 0.99-2.18 | 0.0550 |
| <b>Caffeine consumption</b> |      |           |        |
| No                          | 1.00 |           |        |
| Yes                         | 0.91 | 0.72-1.15 | 0.4400 |
| <b>Tobacco consumption</b>  |      |           |        |
| No                          | 1.00 |           |        |
| Yes                         | 1.26 | 1.06-1.51 | 0.0100 |
| <b>Alcohol consumption</b>  |      |           |        |
| No                          | 1.00 |           |        |
| Yes                         | 1.46 | 0.91-2.32 | 0.1140 |

Note: COR= Crude Odds Ratio, CI= Confidence Interval
